# Supplementary material for: A comprehensive custom panel design for routine hereditary cancer testing: preserving control, improving diagnostics and revealing a complex variation landscape
Source: PubMed Central journal article supplement (PMC5209725; doi:10.1038/srep39348), 2017-01-04
Supplement: srep39348-s1.pdf [file srep39348-s1.pdf]

## SUPPLEMENTARY INFORMATION

### **A comprehensive custom panel design for routine hereditary cancer testing: preserving control, improving diagnostics and revealing a complex variation landscape**

**Elisabeth Castellanos<sup>1#\*</sup>, Bernat Gel<sup>1#</sup>**, Inma Rosas<sup>1</sup>, Eva Tornero<sup>2</sup>, Sheila Santín<sup>3</sup>, Raquel Pluvinet<sup>3</sup>, Juan Velasco<sup>3</sup>, Lauro Sumoy<sup>3</sup>, Jesús del Valle<sup>2</sup>, Manuel Perucho<sup>1</sup>, Ignacio Blanco<sup>4</sup>, Matilde Navarro<sup>2</sup>, Joan Brunet<sup>2</sup>, Marta Pineda<sup>2</sup>, Lidia Feliubadaló<sup>2</sup>, Gabi Capellá<sup>2\*</sup>, Conxi Lázaro<sup>2\*</sup>, Eduard Serra<sup>1\*</sup>

<sup>1</sup>Hereditary Cancer Program, The Institute for Health Science Research Germans Trias i Pujol (IGTP) - PMPPC, Can Ruti Campus, Badalona, Barcelona, Spain

<sup>2</sup>Translational Research Laboratory, Hereditary Cancer Program, Catalan Institute of Oncology (ICO-IDIBELL), L'Hospitalet de Llobregat, Barcelona, (ICO-IDIBGI), Girona, Spain

<sup>3</sup>Genomics and Bioinformatics Unit, IMPPC, Can Ruti Campus, Badalona, Barcelona, Spain

<sup>4</sup>Clinical Genetics and Genetic Counselling Program, Germans Trias i Pujol Hospital, Can Ruti Campus, Badalona, Barcelona, Spain

# Contributed equally to this work

\* Corresponding authors: [eserra@imppc.org](mailto:eserra@imppc.org); [clazaro@iconcologia.net](mailto:clazaro@iconcologia.net); [gcapella@iconcologia.net](mailto:gcapella@iconcologia.net); [ecastellanos@imppc.org](mailto:ecastellanos@imppc.org)

# TP53

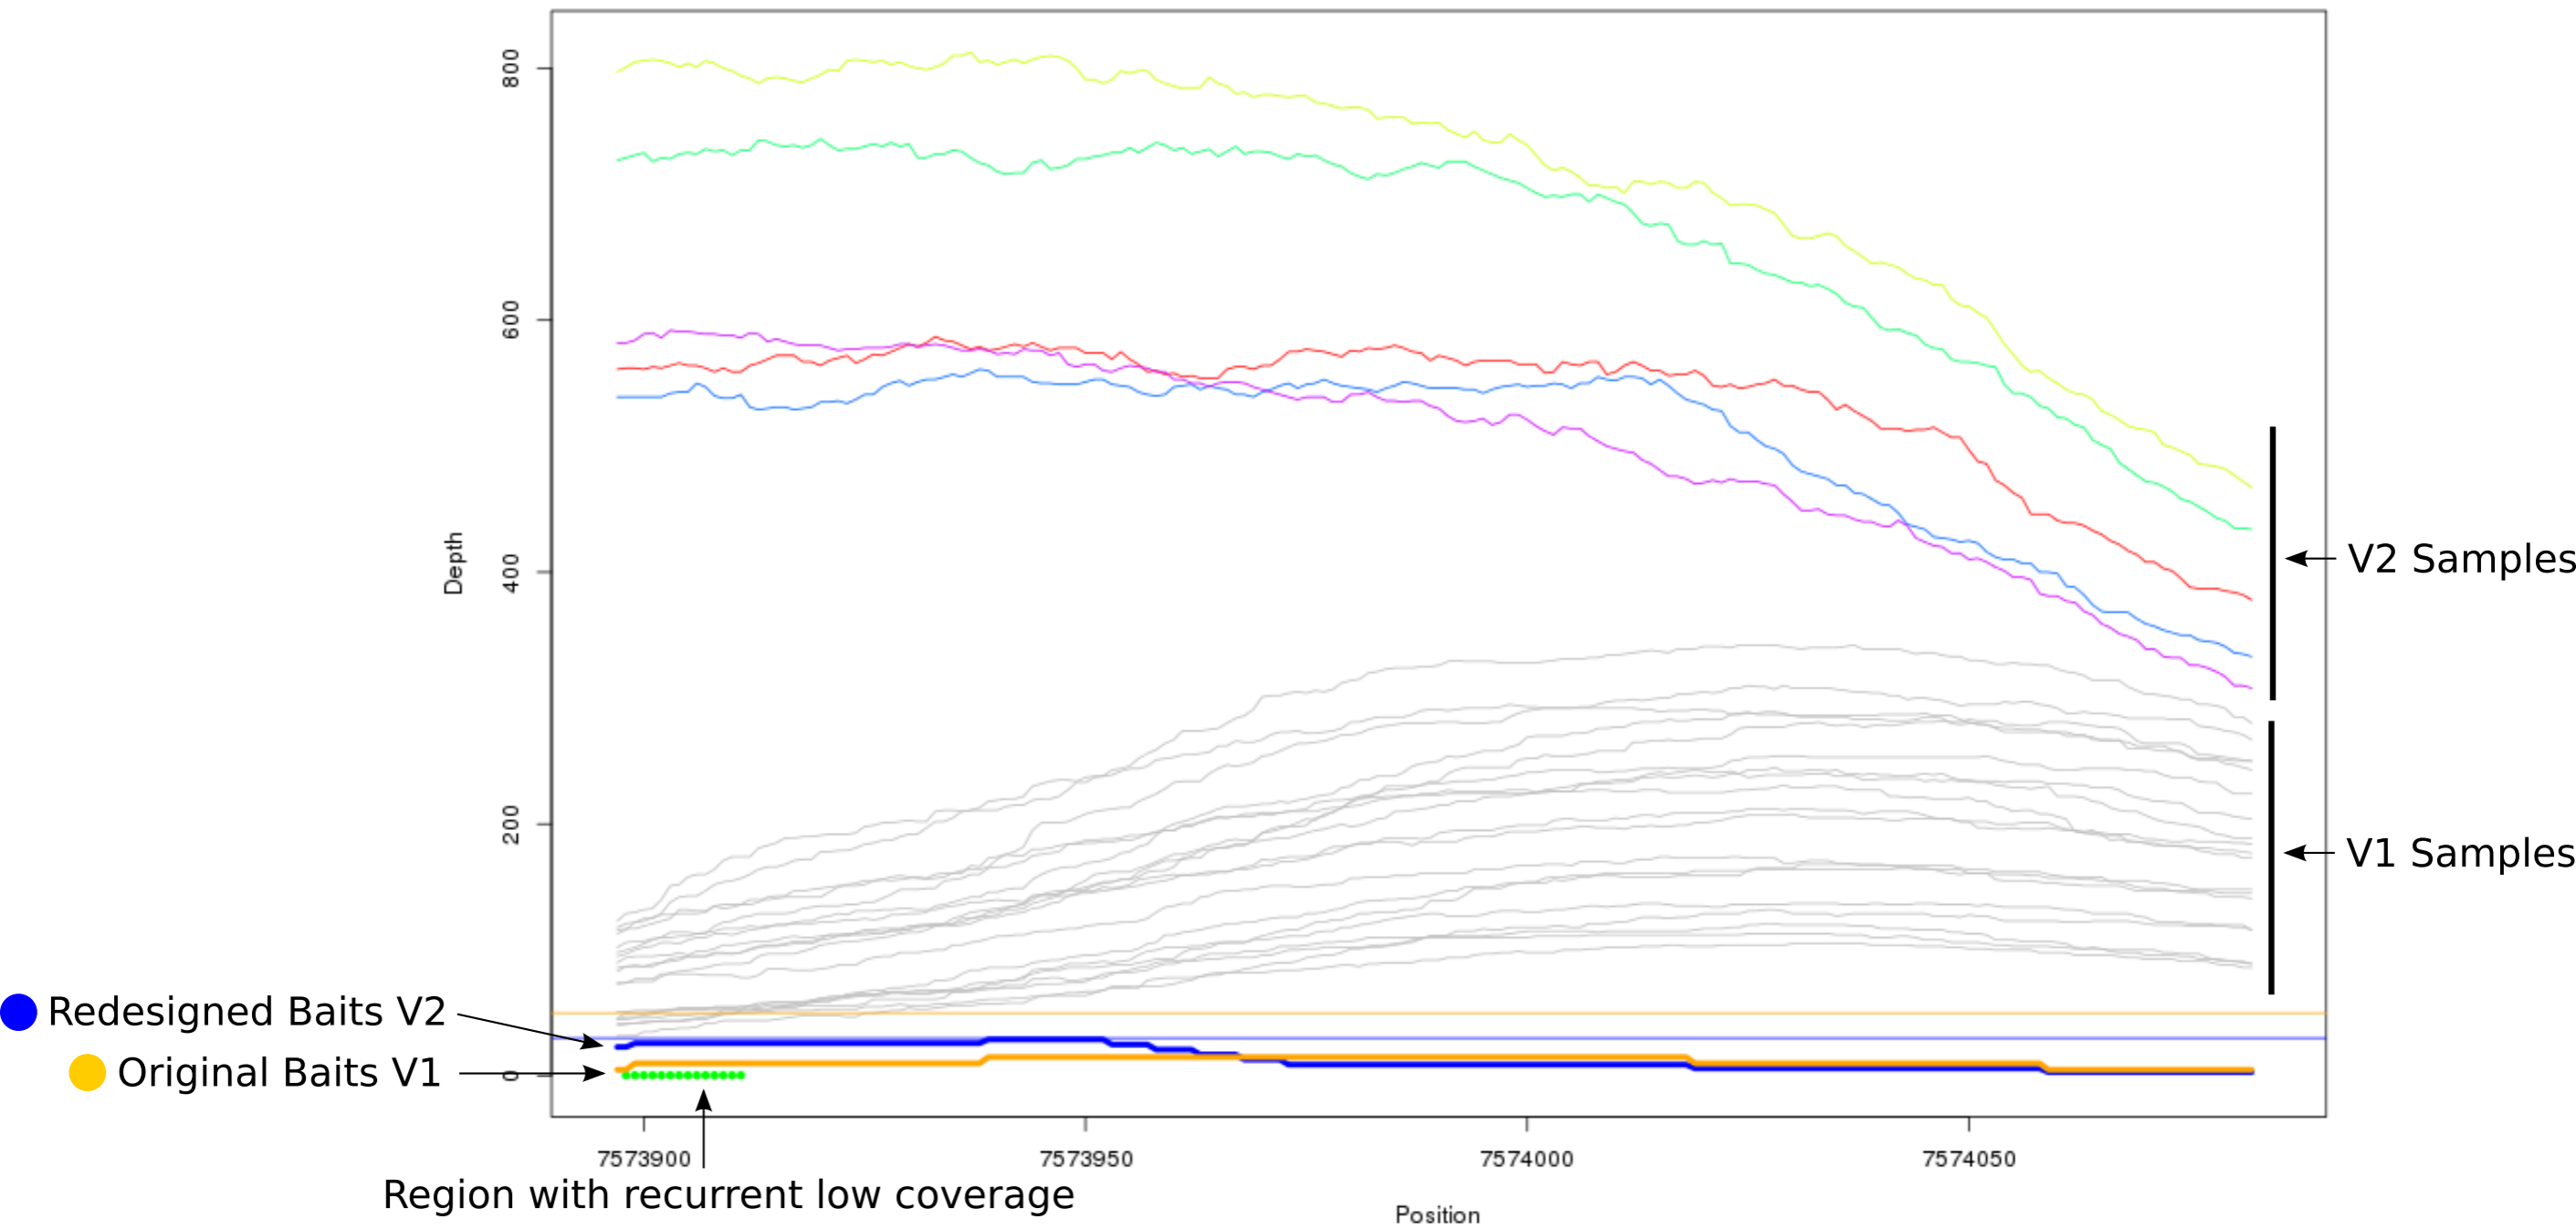



A

Coverage and GC content of recurrently failing exons

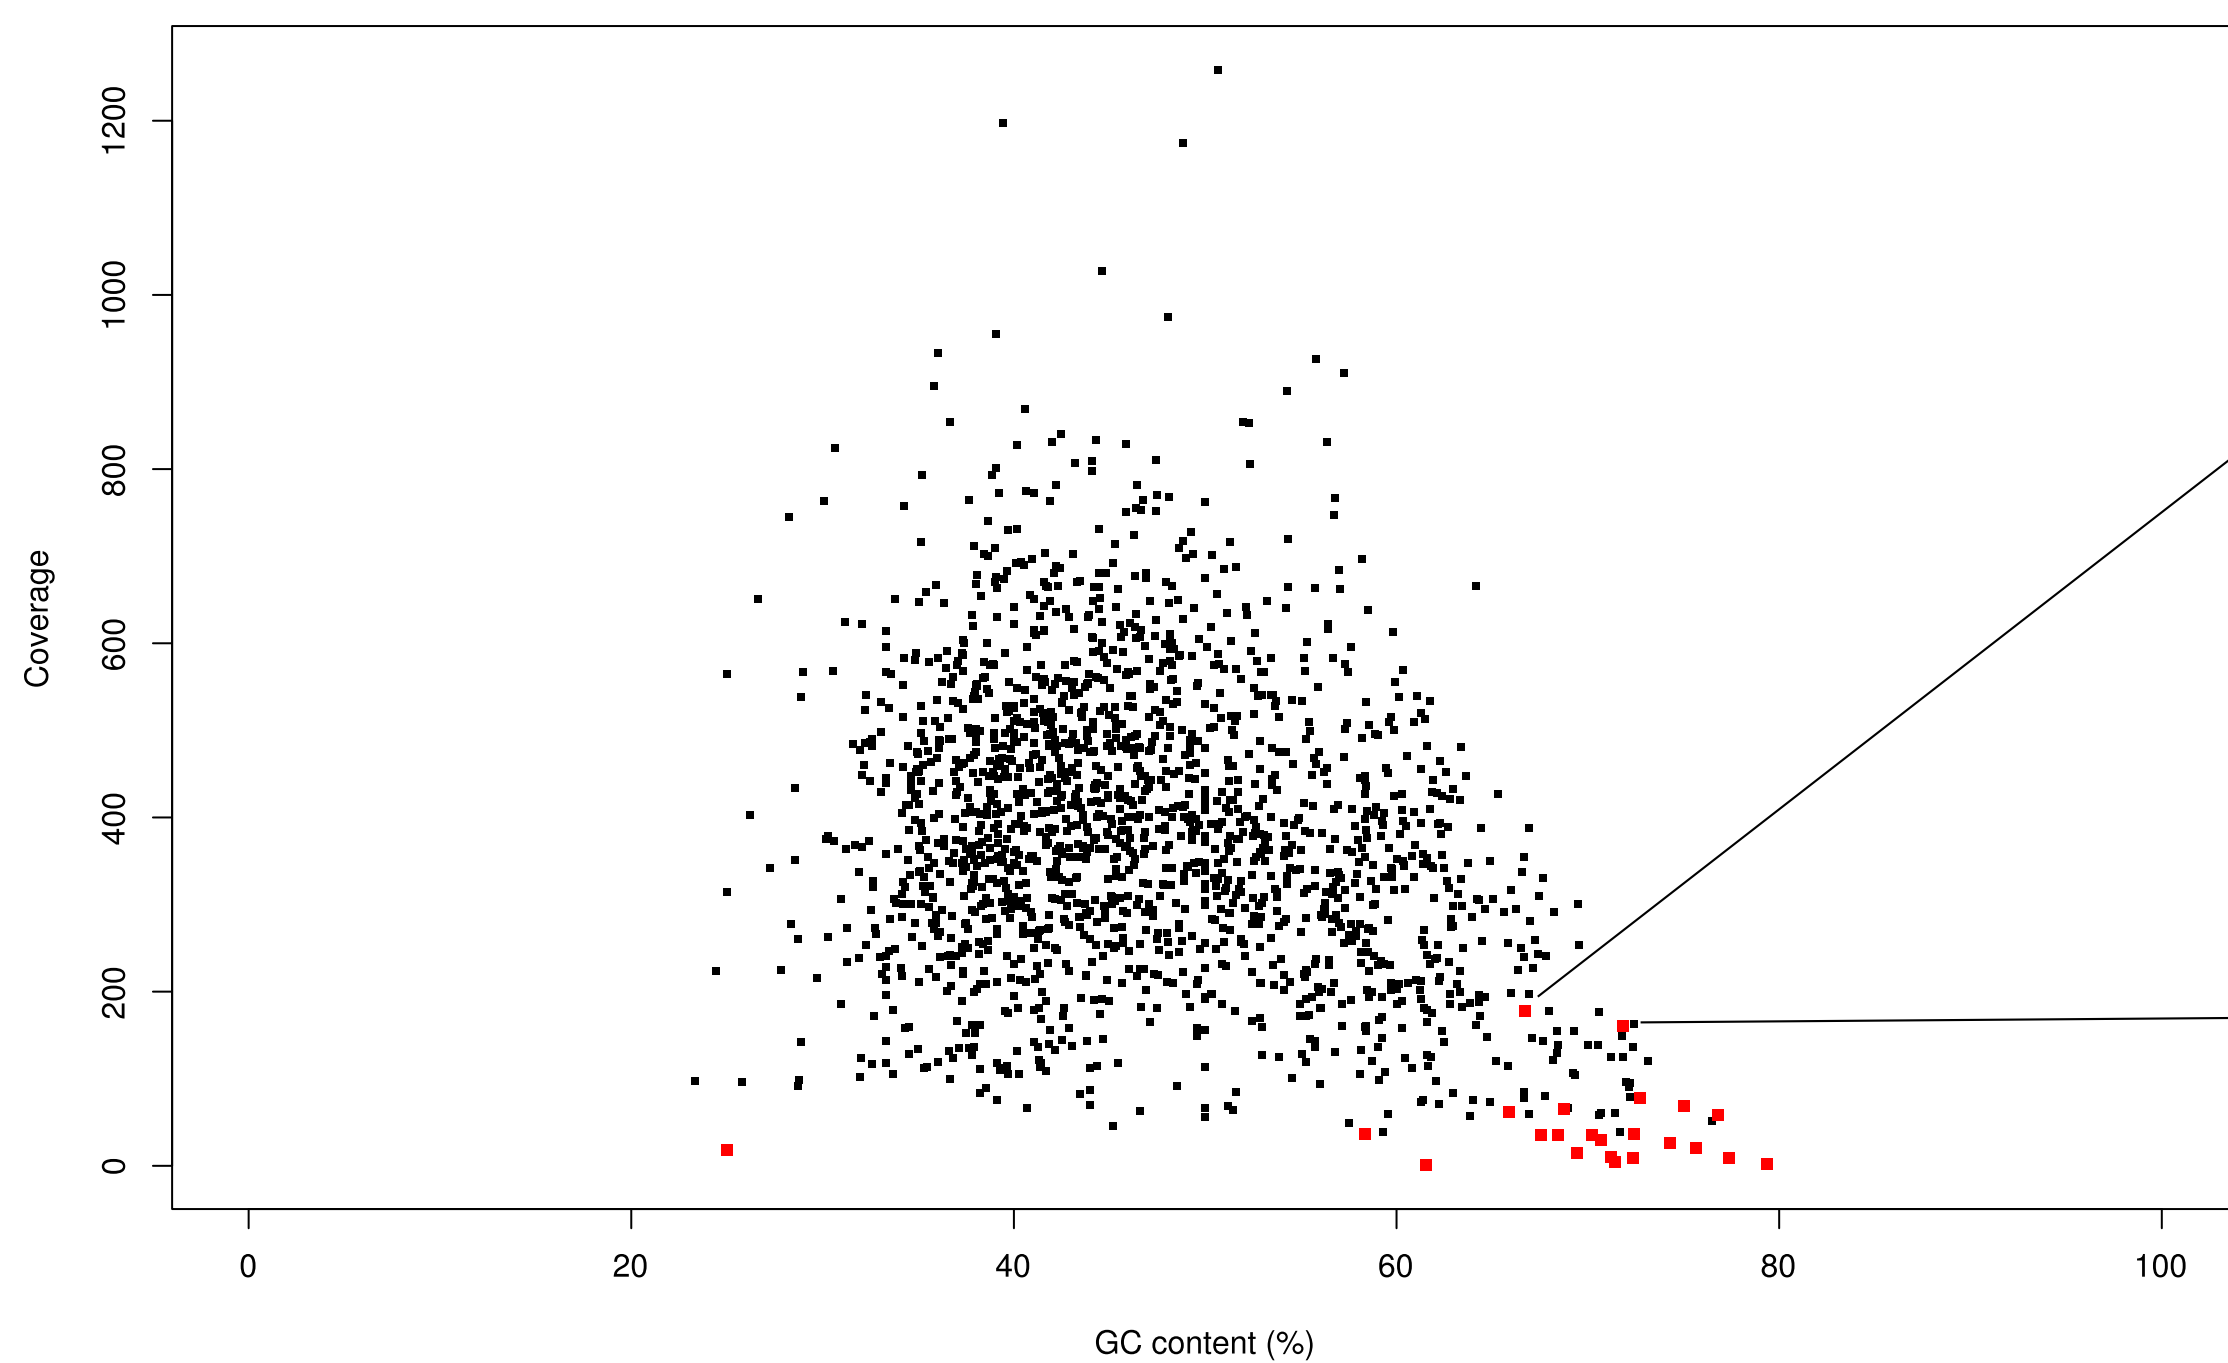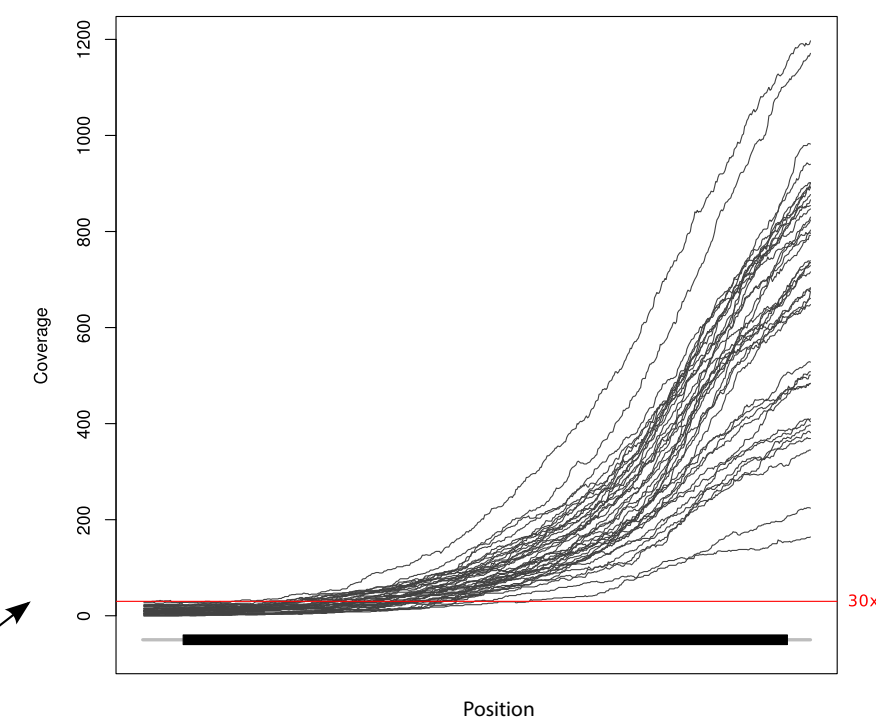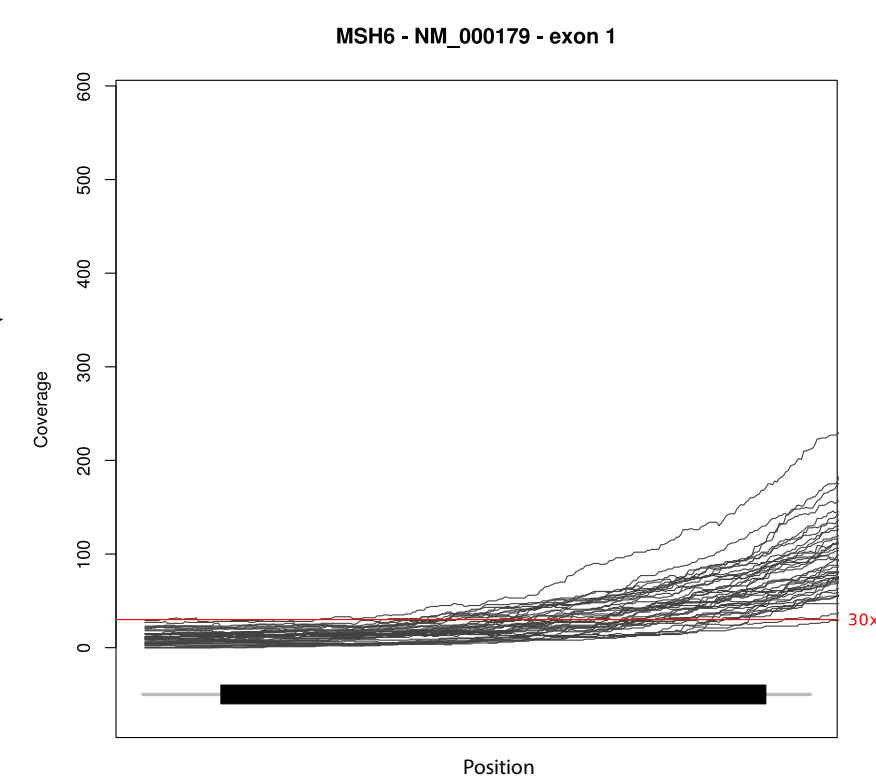

B

| Gene    | Transcript | Exon Rank | EnsemblId       | CDS Start | CDS End |
|---------|------------|-----------|-----------------|-----------|---------|
| BAP1    | NM_004656  | 1         | ENSE00001879355 | 1         | 37      |
| BARD1   | NM_000465  | 1         | ENSE00002311538 | 1         | 158     |
| BRAF    | NM_004333  | 1         | ENSE00001154485 | 1         | 138     |
| CBL     | NM_005188  | 1         | ENSE00001240819 | 1         | 195     |
| CDH1    | NM_004360  | 1         | ENSE00001859184 | 1         | 48      |
| CDKN1C  | NM_000076  | 1         | ENSE00001691292 | 1         | 820     |
| CDKN1C  | NM_000076  | 2         | ENSE00003634161 | 821       | 951     |
| ERCC2   | NM_000400  | 1         | ENSE00001510142 | 1         | 5       |
| FANCA   | NM_000135  | 1         | ENSE00002618162 | 1         | 79      |
| FANCE   | NM_021922  | 1         | ENSE00000849631 | 1         | 248     |
| FH      | NM_000143  | 1         | ENSE00001442032 | 1         | 132     |
| MAP2K2  | NM_030662  | 1         | ENSE00001147081 | 1         | 92      |
| MN1     | NM_002430  | 1         | ENSE00001150385 | 1         | 3781    |
| MSH6    | NM_000179  | 1         | ENSE00002724201 | 1         | 260     |
| NF1     | NM_000267  | 1         | ENSE00003598164 | 1         | 60      |
| PDGFB   | NM_002608  | 4         | ENSE00000654697 | 251       | 456     |
| PTCH1   | NM_000264  | 1         | ENSE00001630740 | 1         | 201     |
| PTPN11  | NM_002834  | 1         | ENSE00001202658 | 1         | 14      |
| RASA1   | NM_002890  | 1         | ENSE00001505330 | 1         | 539     |
| RET     | NM_020975  | 1         | ENSE00001948565 | 1         | 73      |
| TMEM127 | NM_017849  | 2         | ENSE00000921763 | 1         | 244     |
| WT1     | NM_024426  | 1         | ENSE00001906049 | 1         | 646     |
| XPA     | NM_000380  | 1         | ENSE00001465835 | 1         | 172     |

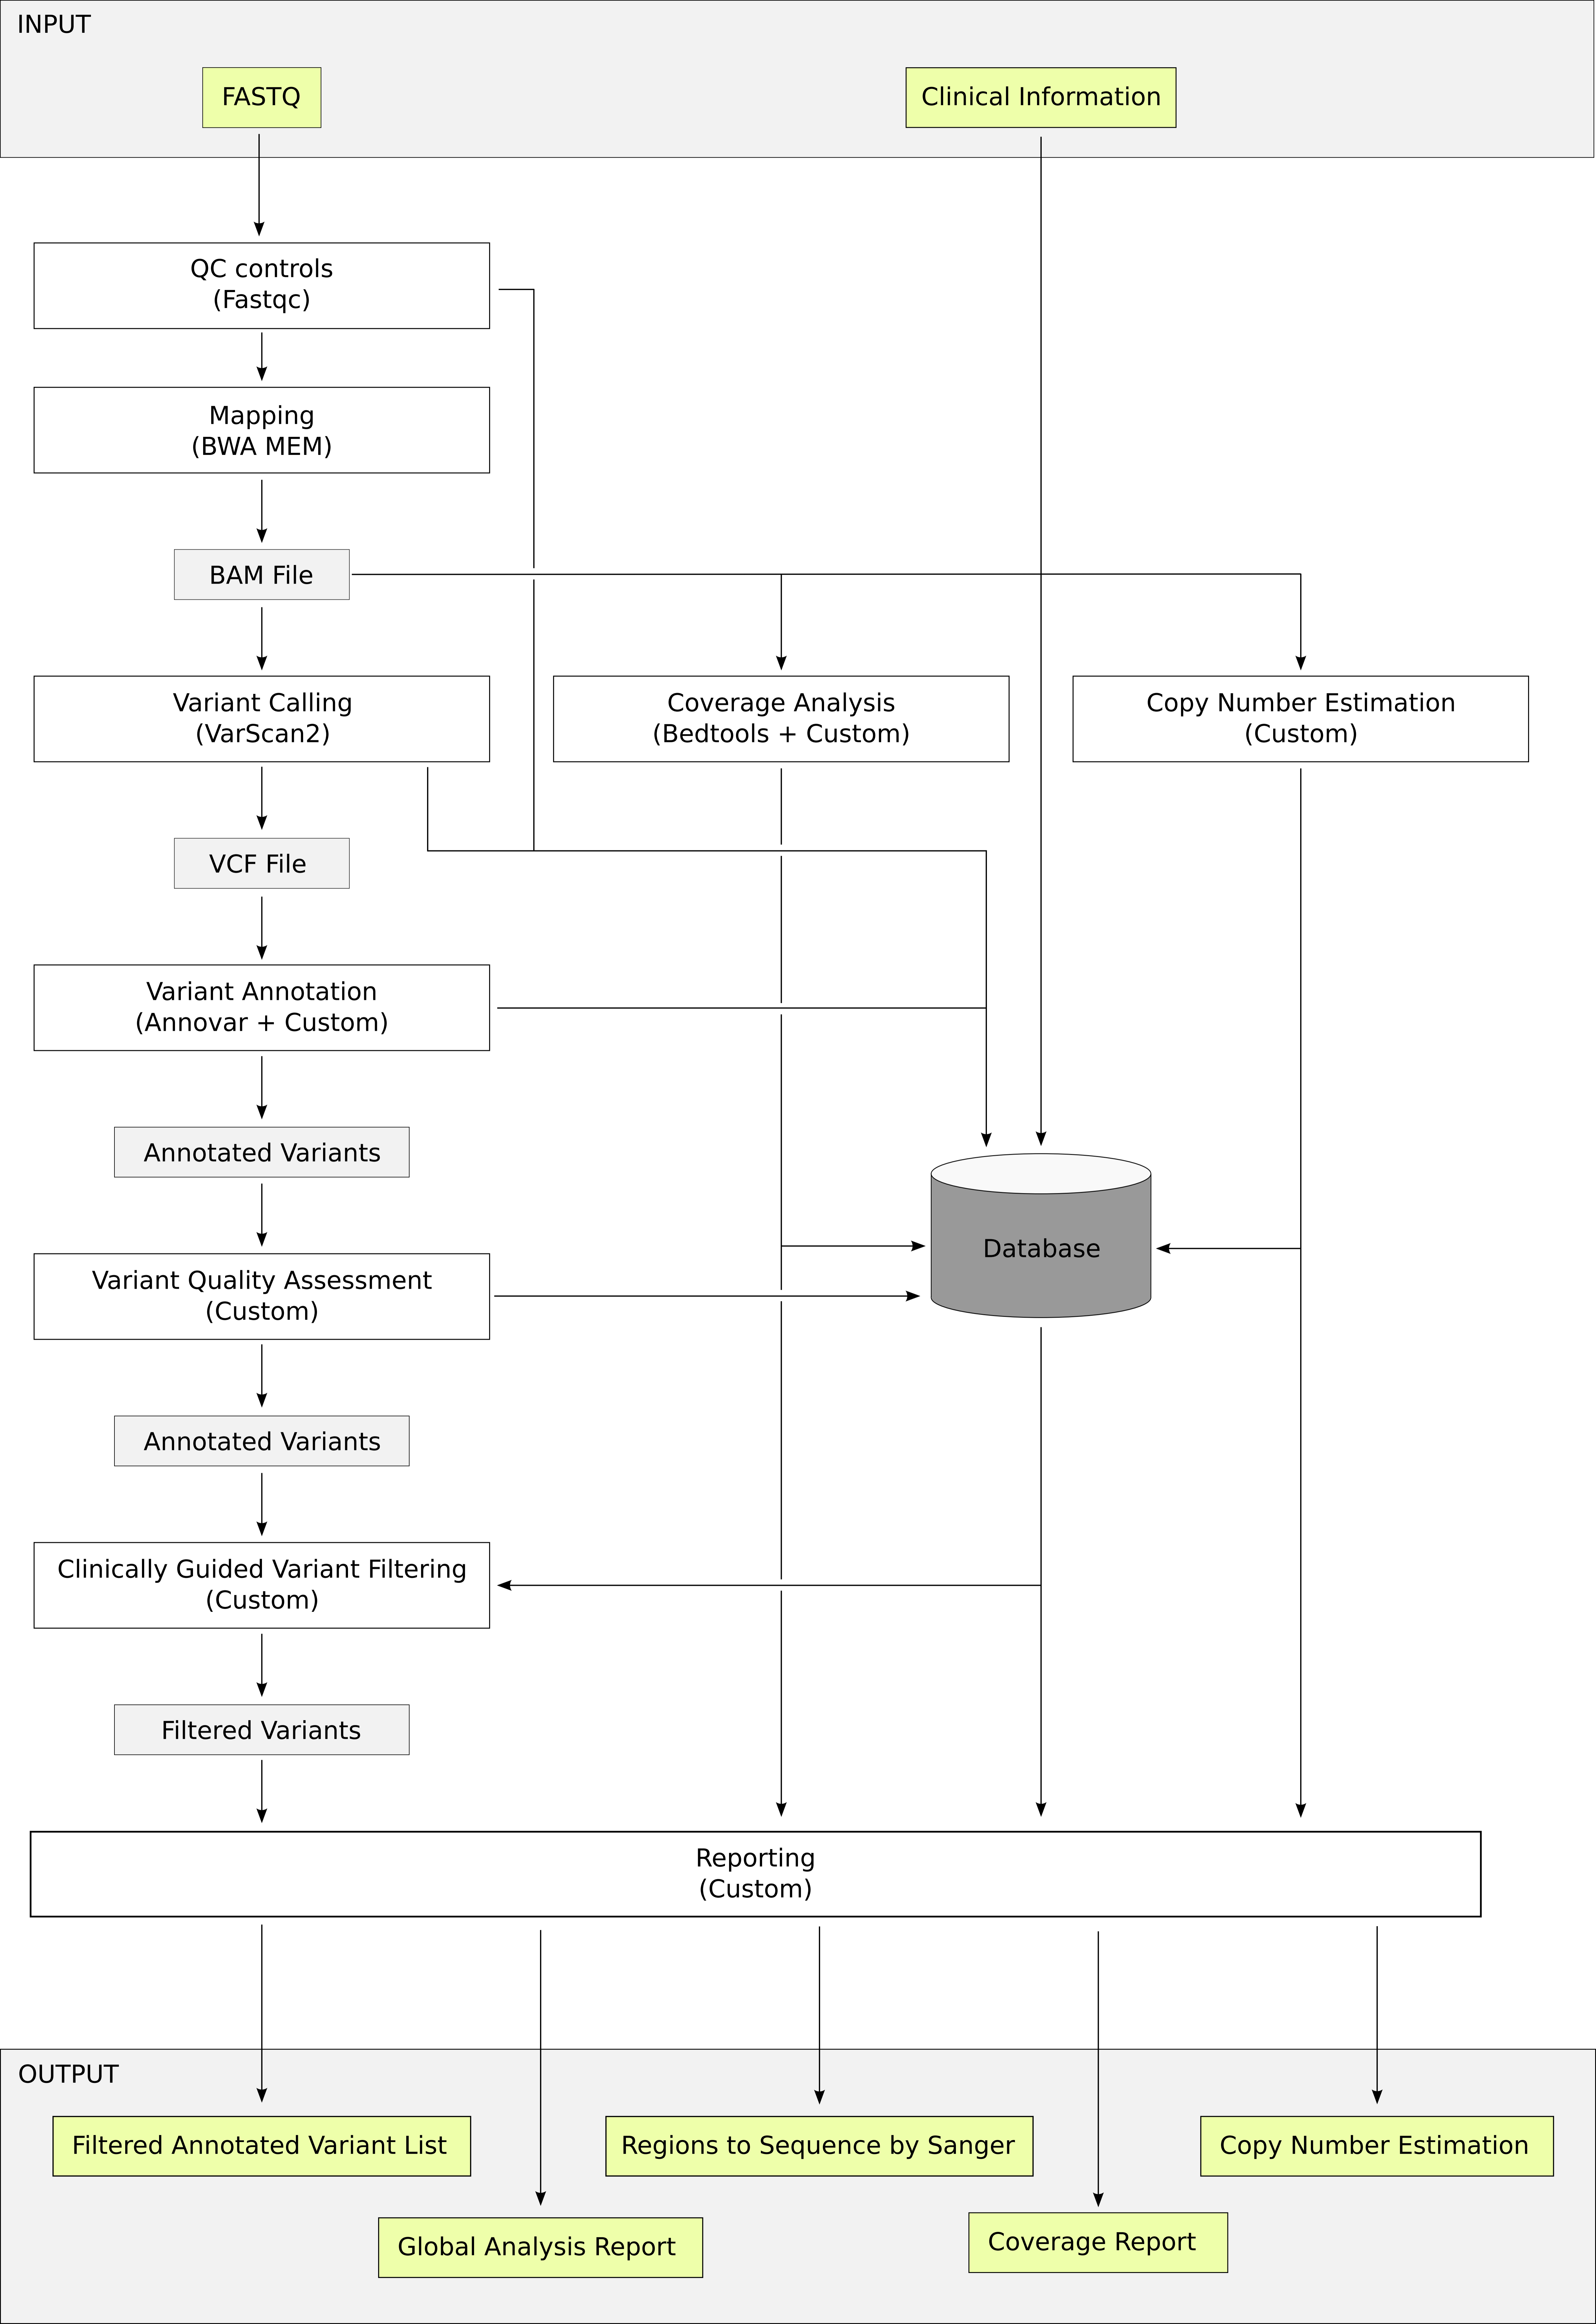

# SUPPLEMENTARY FIGURE 5

## Sample R2

### a. Pedigree

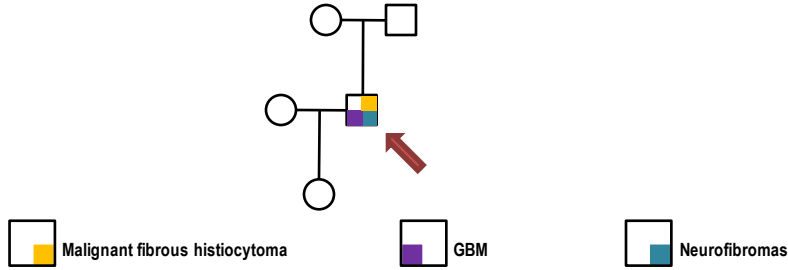

### b. *CDKN2A* Normalized Coverage:

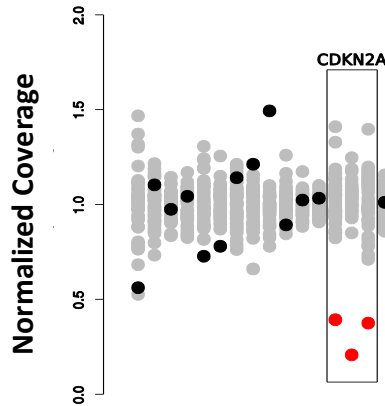

### c. *CDKN2A* & *CDKN2B* deletion validated by MLPA:

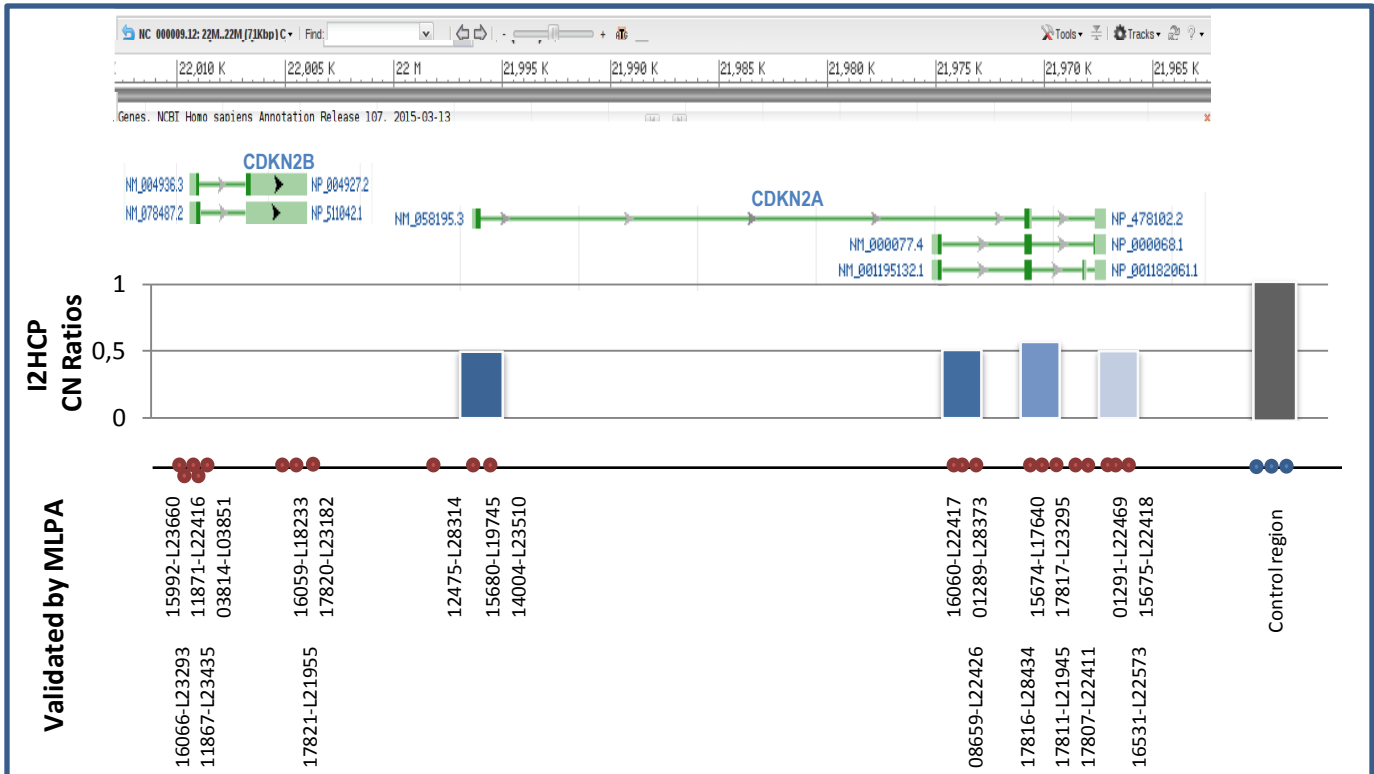

## PATHOGENIC VARIANT TYPES

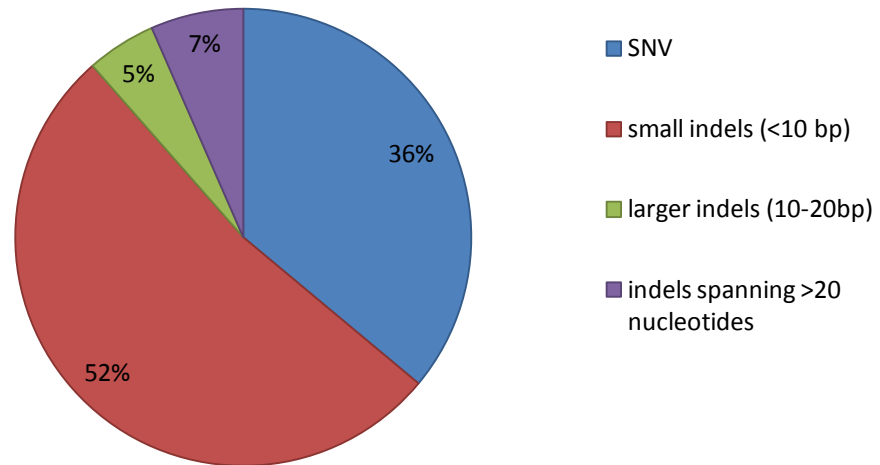

|         | HBOC | FAP | HNPCC | NF1 | NF2 |
|---------|------|-----|-------|-----|-----|
| BRCA1   | •    |     | •     |     |     |
| BRCA2   | •    |     | •     |     |     |
| APC     |      | •   | •     |     |     |
| MUTYH   |      | •   | •     |     |     |
| MLH1    | •    |     | •     |     |     |
| MSH2    | •    |     | •     |     |     |
| MSH6    | •    |     | •     |     |     |
| PMS2    | •    |     | •     |     |     |
| NF1     |      |     |       | •   |     |
| NF2     |      |     |       |     | •   |
| PTEN    | •    | •   | •     |     |     |
| STK11   | •    | •   | •     |     |     |
| EPCAM   | •    |     | •     |     |     |
| TP53    | •    |     | •     |     |     |
| ATM     | •    |     |       |     |     |
| CDH1    | •    |     |       |     |     |
| CHEK2   | •    |     |       |     |     |
| PALB2   | •    |     |       |     |     |
| RAD51C  | •    |     |       |     |     |
| RAD51D  | •    |     |       |     |     |
| POLD1   |      | •   | •     |     |     |
| POLE    |      | •   | •     |     |     |
| BMPR1A  |      | •   |       |     |     |
| SMAD4   |      | •   |       |     |     |
| SPRED1  |      |     |       | •   |     |
| MN1     |      |     |       |     | •   |
| PDGFB   |      |     |       |     | •   |
| SMARCB1 |      |     |       |     | •   |
| SMARCE1 |      |     |       |     | •   |
| SUFU    |      |     |       |     | •   |

### Other Genes Included in the I2HCP:

|        |        |        |         |         |
|--------|--------|--------|---------|---------|
| AIP    | ELAC2  | FANCM  | PDGFRA  | SDHC    |
| ALK    | ERCC2  | FH     | PHOX2B  | SDHD    |
| ARAF   | ERCC3  | FLCN   | PMS1    | SHOC2   |
| BAP1   | ERCC4  | GPC3   | POLH    | SLX4    |
| BARD1  | ERCC5  | HNF1A  | PPM1D   | SOS1    |
| BLM    | ERCC6  | HRAS   | PRKAR1A | TGFBR2  |
| BRAF   | ERCC8  | KIT    | PRSS1   | TMEM127 |
| BRIP1  | EXO1   | KLLN   | PTCH1   | TSC1    |
| BUB1B  | EXT1   | KRAS   | PTPN11  | TSC2    |
| CBL    | EXT2   | MAP2K1 | RAD50   | TSHR    |
| CDC73  | FANCA  | MAP2K2 | RAD51   | VHL     |
| CDK4   | FANCB  | MAX    | RAF1    | WRN     |
| CDKN1C | FANCC  | MEN1   | RASA1   | WT1     |
| CDKN2A | FANCD2 | MET    | RB1     | XPA     |
| CDKN2C | FANCE  | MLH3   | RET     | XPC     |
| CYLD   | FANCF  | MRE11A | RNASEL  | XRCC2   |
| DDB1   | FANCG  | MSH3   | SBDS    |         |
| DDB2   | FANCI  | NBN    | SDHAF2  |         |
| DICER1 | FANCL  | NRAS   | SDHB    |         |



**Table S2:** Results from Training set (n=23)

| Sample | Genes        | Pathogenic Variant                  | Detected in 1st Approach | Detected in 2nd Approach | Variant Context |
|--------|--------------|-------------------------------------|--------------------------|--------------------------|-----------------|
| T1     | <i>BRCA1</i> | NM_007294.2: c.2397T>A              | YES                      | YES                      |                 |
| T2     | <i>APC</i>   | NM_001127510.2: c.3927_3931delAAAGA | YES                      | YES                      |                 |
| T3     | <i>NF1</i>   | NM_000267.3:c.7739C>G               | YES                      | YES                      |                 |
| T4     | <i>NF1</i>   | NM_000267.3: c.3860_3861insTT       | YES                      | YES                      |                 |
| T5     | <i>BRCA1</i> | NM_007294.2:c.1961delA              | NO                       | YES                      | HomoP           |
| T6     | <i>MLH1</i>  | NM_000249.3: c.306+5A>G             | YES                      | YES                      |                 |
| T7     | <i>BRCA2</i> | NM_000059.3:c.956dupA               | NO                       | YES                      | HomoP           |
| T8     | <i>MSH6</i>  | NM_000179.2:c.3261delC              | NO                       | YES                      | HomoP           |
| T9     | <i>NF1</i>   | NM_000267.3:c.4306A>G               | YES                      | YES                      |                 |
| T10    | <i>MSH6</i>  | NM_000179.2:c.255dupC               | NO                       | NO                       | Low coverage    |
| T11    | <i>NF1</i>   | NM_000267.3: Del exons 33-36        | YES                      | YES                      |                 |
| T12    | <i>NF2</i>   | NM_000268.3: Del exons 1-5          | YES                      | YES                      |                 |
| T13    | <i>NF1</i>   | NM_000267.3:c.6365-2A>G             | YES                      | YES                      |                 |
| T14    | <i>APC</i>   | NM_001127510.2:c.423-3T>A           | YES                      | YES                      |                 |
| T15    | <i>MSH2</i>  | NM_000251.2:c.602_603insT           | NO                       | YES                      | HomoP           |
| T16    | <i>BRCA2</i> | NM_000059.3:c.8946delA              | NO                       | YES                      | HomoP           |
| T17    | <i>BRCA2</i> | NM_000059.3:c.2402_2420del19        | YES                      | YES                      |                 |
| T18    | <i>BRCA2</i> | NM_000059.3:c.6275_6276delTT        | YES                      | YES                      |                 |
| T19    | <i>MSH6</i>  | NM_000179.2:c.3150_3161dup12        | YES                      | YES                      |                 |
| T20    | <i>MSH6</i>  | NM_000179.2:c.3261dupC              | NO                       | YES                      | HomoP           |
| T21    | <i>MLH1</i>  | NM_000249.3:c.1590_1598dup9         | YES                      | YES                      |                 |
| T22    | <i>NF1</i>   | NM_000267.3:c.6226delG              | YES                      | YES                      |                 |
| T23    | <i>BRCA1</i> | NM_007294.2:c.1953_1956delGAAA      | YES                      | YES                      |                 |

Sheet1

| sample | totalReads | pctMappedReads | properlyPairedReads | meanCoverage | medianCoverage | maxCoverage | C1     | C10    | C30    | C60    | C100   | U20   | U50   |
|--------|------------|----------------|---------------------|--------------|----------------|-------------|--------|--------|--------|--------|--------|-------|-------|
| T1     | 2700557    | 99.89%         | 98.48%              | 458.3894277  | 442            | 1443        | 99.93% | 99.78% | 99.35% | 98.42% | 96.72% | 0.66% | 0.28% |
| T2     | 3620541    | 99.90%         | 98.90%              | 601.7126241  | 580            | 2052        | 99.96% | 99.82% | 99.41% | 98.89% | 97.53% | 0.67% | 0.28% |
| T3     | 2971530    | 99.90%         | 98.87%              | 496.6900251  | 476            | 1741        | 99.97% | 99.75% | 99.15% | 98.11% | 96.55% | 0.68% | 0.30% |
| T4     | 3080176    | 99.90%         | 98.97%              | 557.5283568  | 535            | 1886        | 99.90% | 99.73% | 99.28% | 98.46% | 97.08% | 0.69% | 0.31% |
| T5     | 2932666    | 99.22%         | 96.18%              | 336.7794168  | 325            | 1236        | 99.92% | 99.68% | 98.75% | 96.89% | 93.72% | 0.68% | 0.31% |
| T6     | 2948395    | 99.89%         | 97.81%              | 270.3864092  | 256            | 1087        | 99.59% | 98.82% | 97.39% | 94.58% | 88.94% | 0.70% | 0.34% |
| T7     | 2974347    | 99.80%         | 97.34%              | 483.3309917  | 465            | 1679        | 99.94% | 99.69% | 99.18% | 98.21% | 96.27% | 0.68% | 0.30% |
| T8     | 4030929    | 98.80%         | 95.68%              | 579.8089141  | 558            | 2152        | 99.97% | 99.69% | 99.27% | 98.24% | 96.68% | 0.69% | 0.31% |
| T9     | 6529562    | 99.04%         | 97.86%              | 1086.624322  | 1051           | 3512        | 99.99% | 99.83% | 99.61% | 99.21% | 98.53% | 0.69% | 0.30% |
| T10    | 2937637    | 99.75%         | 97.56%              | 398.1105709  | 382            | 1500        | 99.87% | 99.68% | 99.03% | 97.58% | 95.35% | 0.68% | 0.31% |
| T11    | 3455356    | 99.95%         | 98.73%              | 155.0875564  | 149            | 579         | 99.65% | 98.52% | 96.55% | 90.25% | 75.71% | 0.68% | 0.31% |
| T12    | 3454764    | 99.91%         | 98.69%              | 526.7052471  | 508            | 1792        | 99.98% | 99.78% | 99.26% | 98.42% | 96.87% | 0.68% | 0.29% |
| T13    | 3157978    | 99.95%         | 98.83%              | 438.9549286  | 422            | 1609        | 99.55% | 98.83% | 97.91% | 96.69% | 94.56% | 0.70% | 0.34% |
| T14    | 3040733    | 99.38%         | 95.45%              | 481.469552   | 463            | 1725        | 99.86% | 99.69% | 99.12% | 98.28% | 96.28% | 0.68% | 0.30% |
| T15    | 2491293    | 99.55%         | 97.02%              | 409.6304417  | 395            | 1465        | 99.89% | 99.66% | 99.12% | 97.69% | 95.47% | 0.68% | 0.30% |
| T16    | 4103602    | 99.37%         | 97.17%              | 447.420466   | 426            | 1672        | 99.93% | 99.60% | 98.93% | 97.58% | 95.60% | 0.69% | 0.31% |
| T17    | 4101591    | 99.32%         | 97.40%              | 646.1095886  | 621            | 2398        | 99.92% | 99.79% | 99.37% | 98.63% | 97.24% | 0.69% | 0.31% |
| T18    | 2823557    | 99.55%         | 97.95%              | 440.1877041  | 424            | 1643        | 99.95% | 99.69% | 98.93% | 97.72% | 95.78% | 0.69% | 0.31% |
| T19    | 4366424    | 99.70%         | 98.02%              | 635.1975054  | 605            | 2428        | 99.99% | 99.77% | 99.33% | 98.52% | 97.20% | 0.69% | 0.32% |
| T20    | 3517122    | 99.94%         | 98.95%              | 512.7125471  | 496            | 1768        | 99.92% | 99.76% | 99.25% | 98.36% | 96.79% | 0.67% | 0.30% |
| T21    | 3414029    | 99.84%         | 98.44%              | 489.5334775  | 472            | 1741        | 99.90% | 99.76% | 99.26% | 98.20% | 96.49% | 0.67% | 0.30% |
| T22    | 2852050    | 99.41%         | 98.01%              | 506.8352003  | 484            | 2014        | 99.90% | 99.64% | 99.17% | 98.19% | 96.49% | 0.69% | 0.32% |
| T23    | 2702987    | 99.59%         | 97.87%              | 432.9446815  | 413            | 1649        | 99.91% | 99.70% | 99.05% | 97.76% | 95.75% | 0.69% | 0.31% |
| V1     | 3120052    | 99.94%         | 98.80%              | 295.6665951  | 290            | 842         | 99.95% | 99.52% | 98.55% | 96.75% | 93.33% | 0.66% | 0.27% |
| V2     | 3102542    | 99.91%         | 98.89%              | 437.7827133  | 414            | 1910        | 99.82% | 99.33% | 98.53% | 97.27% | 94.89% | 0.70% | 0.32% |
| V3     | 3184166    | 99.93%         | 98.94%              | 412.2868723  | 400            | 1354        | 99.95% | 99.75% | 99.16% | 97.93% | 95.95% | 0.68% | 0.29% |
| V4     | 3564282    | 99.73%         | 98.73%              | 566.3987475  | 534            | 2428        | 99.83% | 99.41% | 98.60% | 97.57% | 96.07% | 0.71% | 0.34% |
| V5     | 2324799    | 99.66%         | 98.38%              | 234.0922369  | 217            | 1019        | 99.84% | 98.74% | 95.74% | 89.85% | 80.52% | 0.76% | 0.44% |
| V6     | 2762570    | 99.71%         | 98.75%              | 409.2610649  | 376            | 1933        | 99.81% | 99.08% | 97.43% | 95.03% | 90.66% | 0.77% | 0.46% |
| V7     | 3389493    | 99.36%         | 97.71%              | 490.9416272  | 460            | 2102        | 99.81% | 99.19% | 98.19% | 96.77% | 94.31% | 0.72% | 0.38% |
| V8     | 2898965    | 99.68%         | 98.58%              | 480.3903083  | 454            | 1917        | 99.81% | 99.24% | 98.23% | 96.98% | 94.55% | 0.72% | 0.36% |
| V9     | 3022540    | 99.66%         | 97.68%              | 180.8694414  | 174            | 645         | 99.79% | 99.28% | 97.32% | 92.81% | 82.18% | 0.68% | 0.30% |
| V10    | 3142118    | 99.82%         | 98.55%              | 412.5336949  | 402            | 1243        | 99.89% | 99.59% | 99.07% | 97.95% | 96.13% | 0.67% | 0.28% |
| V11    | 3348711    | 99.61%         | 97.56%              | 539.0104176  | 523            | 1576        | 99.98% | 99.84% | 99.38% | 98.67% | 97.39% | 0.67% | 0.28% |
| V12    | 3815649    | 99.73%         | 97.82%              | 114.4278238  | 111            | 390         | 99.82% | 98.79% | 95.11% | 83.63% | 56.84% | 0.68% | 0.30% |
| V13    | 3202154    | 99.68%         | 97.92%              | 483.2600551  | 473            | 1444        | 99.96% | 99.77% | 99.24% | 98.34% | 96.67% | 0.67% | 0.28% |
| V14    | 3118424    | 99.15%         | 96.59%              | 463.5094917  | 451            | 1366        | 99.97% | 99.70% | 99.25% | 98.31% | 96.60% | 0.66% | 0.28% |
| V15    | 3310405    | 99.77%         | 97.91%              | 515.3704581  | 493            | 1820        | 99.94% | 99.66% | 99.12% | 98.18% | 96.73% | 0.69% | 0.31% |
| V16    | 2675671    | 99.86%         | 98.01%              | 393.4459817  | 377            | 1546        | 99.95% | 99.63% | 98.73% | 97.32% | 94.81% | 0.69% | 0.31% |
| V17    | 3121897    | 99.88%         | 97.46%              | 366.6039986  | 349            | 1422        | 99.87% | 99.48% | 98.62% | 97.06% | 94.23% | 0.69% | 0.32% |
| V18    | 3209613    | 99.88%         | 98.22%              | 497.52831    | 478            | 1793        | 99.96% | 99.61% | 99.01% | 97.96% | 96.28% | 0.68% | 0.31% |
| V19    | 1655353    | 99.83%         | 97.31%              | 237.1547783  | 226            | 836         | 99.89% | 99.23% | 97.88% | 94.76% | 87.70% | 0.70% | 0.33% |
| V20    | 2735448    | 99.76%         | 97.67%              | 425.3410158  | 409            | 1547        | 99.88% | 99.57% | 98.91% | 97.62% | 95.57% | 0.68% | 0.31% |
| V21    | 3343120    | 99.85%         | 97.90%              | 509.2725969  | 494            | 1663        | 99.95% | 99.68% | 99.22% | 98.21% | 96.82% | 0.68% | 0.30% |
| V22    | 5416213    | 98.65%         | 96.47%              | 272.6839881  | 263            | 1017        | 99.92% | 99.51% | 98.33% | 96.14% | 91.34% | 0.68% | 0.30% |
| V23    | 4263438    | 99.94%         | 98.48%              | 208.4556151  | 200            | 725         | 99.84% | 99.32% | 97.58% | 93.85% | 85.93% | 0.68% | 0.31% |
| V24    | 3250856    | 99.92%         | 98.46%              | 401.8487658  | 386            | 1443        | 99.85% | 99.65% | 99.26% | 97.93% | 95.44% | 0.68% | 0.29% |
| V25    | 3511443    | 99.93%         | 98.70%              | 445.2353951  | 426            | 1590        | 99.97% | 99.77% | 99.19% | 98.06% | 96.08% | 0.67% | 0.30% |
| V26    | 3815216    | 99.94%         | 98.73%              | 624.4534936  | 602            | 2206        | 99.99% | 99.83% | 99.39% | 98.84% | 97.75% | 0.67% | 0.29% |
| V27    | 3403384    | 99.94%         | 98.40%              | 397.4319897  | 382            | 1351        | 99.93% | 99.71% | 99.12% | 97.99% | 95.54% | 0.67% | 0.29% |
| V28    | 4403274    | 99.92%         | 98.60%              | 727.3731052  | 704            | 2487        | 99.93% | 99.76% | 99.55% | 99.10% | 98.20% | 0.67% | 0.28% |
| V29    | 2993755    | 99.94%         | 98.13%              | 209.4945422  | 202            | 704         | 99.85% | 99.36% | 97.89% | 94.44% | 86.80% | 0.68% | 0.29% |
| V30    | 3135958    | 99.94%         | 98.64%              | 465.2157651  | 448            | 1693        | 99.93% | 99.74% | 99.12% | 98.16% | 96.31% | 0.67% | 0.29% |
| V31    | 2925995    | 99.93%         | 98.61%              | 273.4182949  | 256            | 1057        | 99.94% | 99.41% | 98.08% | 95.46% | 89.72% | 0.70% | 0.34% |
| V32    | 3160863    | 99.93%         | 97.03%              | 235.1366617  | 221            | 934         | 99.84% | 99.20% | 97.47% | 94.15% | 86.72% | 0.71% | 0.35% |
| V33    | 3427158    | 99.85%         | 92.68%              | 493.8036751  | 475            | 1685        | 99.92% | 99.75% | 99.18% | 98.22% | 96.56% | 0.68% | 0.30% |
| V34    | 3248449    | 99.92%         | 98.92%              | 493.7740374  | 475            | 1732        | 99.94% | 99.74% | 99.31% | 98.32% | 96.51% | 0.68% | 0.30% |
| V35    | 2826057    | 99.94%         | 99.05%              | 387.3789909  | 373            | 1447        | 99.85% | 99.45% | 98.83% | 97.71% | 95.29% | 0.67% | 0.29% |
| V36    | 2551495    | 99.89%         | 98.71%              | 253.8151548  | 244            | 1015        | 99.78% | 99.21% | 98.14% | 95.76% | 90.67% | 0.68% | 0.29% |
| V37    | 3427675    | 99.91%         | 98.60%              | 135.1547646  | 131            | 469         | 99.44% | 98.35% | 95.37% | 86.84% | 68.07% | 0.69% | 0.32% |
| V38    | 2648692    | 99.67%         | 98.59%              | 397.9490951  | 378            | 1483        | 99.71% | 99.10% | 98.08% | 96.71% | 94.14% | 0.71% | 0.34% |
| V39    | 2771123    | 99.94%         | 99.22%              | 459.7732505  | 435            | 1881        | 99.83% | 99.24% | 98.35% | 97.28% | 95.34% | 0.70% | 0.33% |
| V40    | 3422016    | 99.93%         | 99.23%              | 575.9554321  | 548            | 2453        | 99.90% | 99.48% | 98.78% | 98.00% | 96.60% | 0.70% | 0.32% |

Supplementary Table S4

| Sample Name | Variants in analyzed genes detected with I2HCP V2 | Rs (Snp138)       | Variant Freq | Status     | Reason to be undetected by pre-NGS methods | Validated by Sanger | Variants also detected in I2HCP V1 (PGM ) |
|-------------|---------------------------------------------------|-------------------|--------------|------------|--------------------------------------------|---------------------|-------------------------------------------|
| TRAINING    |                                                   |                   |              |            |                                            |                     |                                           |
| T1          |                                                   |                   |              |            |                                            |                     |                                           |
|             | BRCA2:NM_000059:c.425+67A>C                       | rs11571610        | 56,27        | Known      |                                            |                     | YES                                       |
|             | BRCA2:NM_000059:c.425+147G>T                      | rs4942423         | 44,83        |            | Out of pre-NGS method covered region       |                     |                                           |
|             | BRCA2:NM_000059:c.426-89T>C                       | rs3783265         | 55,11        | Known      |                                            |                     | YES                                       |
|             | BRCA2:NM_000059:c.631+183T>A                      | rs3752451         | 48,57        |            | Out of pre-NGS method covered region       |                     |                                           |
|             | BRCA2:NM_000059:c.681+56C>T                       | rs2126042         | 49,3         |            | Out of pre-NGS method covered region       |                     |                                           |
|             | BRCA2:NM_000059:c.793+98G>A                       | rs206073          | 99,24        |            | Out of pre-NGS method covered region       |                     |                                           |
|             | BRCA2:NM_000059:c.865A>C                          | rs766173          | 46,41        | Known      |                                            |                     | YES                                       |
|             | BRCA2:NM_000059:c.1365A>G                         | rs1801439         | 36,47        | Known      |                                            |                     | YES                                       |
|             | BRCA2:NM_000059:c.1910-74T>C                      | rs2320236         | 48,62        |            | Out of pre-NGS method covered region       |                     |                                           |
|             | BRCA2:NM_000059:c.1910-51G>T                      | rs11571651        | 49,87        |            | Out of pre-NGS method covered region       |                     |                                           |
|             | BRCA2:NM_000059:c.2229T>C                         | rs1801499         | 48,6         | Known      |                                            |                     | YES                                       |
|             | BRCA2:NM_000059:c.2971A>G                         | rs1799944         | 52,22        | Known      |                                            |                     | YES                                       |
|             | BRCA2:NM_000059:c.4563A>G                         | rs206075          | 100          |            | Could not be detected by CSCE              |                     |                                           |
|             | BRCA2:NM_000059:c.6513G>C                         | rs206076          | 100          |            | Could not be detected by CSCE              |                     |                                           |
|             | BRCA2:NM_000059:c.6937+151A>G                     | rs4942439         | 41,38        |            | Out of pre-NGS method covered region       |                     |                                           |
|             | BRCA2:NM_000059:c.6937+177G>A                     | rs4942440         | 41,67        |            | Out of pre-NGS method covered region       |                     |                                           |
|             | BRCA2:NM_000059:c.6938-120T>C                     | rs206080          | 100          |            | Out of pre-NGS method covered region       |                     |                                           |
|             | BRCA2:NM_000059:c.7397T>C                         | rs169547          | 100          |            | Could not be detected by CSCE              |                     |                                           |
|             | BRCA2:NM_000059:c.7435+53C>T                      | rs11147489        | 48,15        | Known      |                                            |                     | YES                                       |
|             | BRCA2:NM_000059:c.7617+190G>A                     | rs206096          | 100          |            | Out of pre-NGS method covered region       |                     |                                           |
|             | BRCA2:NM_000059:c.7806-14T>C                      | rs9534262         | 100          | Known      |                                            |                     | YES                                       |
|             | BRCA2:NM_000059:c.8755-66T>C                      | rs4942486         | 99,57        |            | Out of pre-NGS method covered region       |                     |                                           |
|             | BRCA2:NM_000059:c.9648+244T>C                     | rs206344          | 100          |            | Out of pre-NGS method covered region       |                     |                                           |
|             | BRCA1:NM_007294:c.5407-193A>G                     | rs8176310         | 62,86        |            | Out of pre-NGS method covered region       |                     |                                           |
|             | BRCA1:NM_007294:c.5278-191A>T                     | rs8176297         | 33,78        |            | Out of pre-NGS method covered region       |                     |                                           |
|             | BRCA1:NM_007294:c.5152+66G>A                      | rs3092994         | 49,71        |            | Out of pre-NGS method covered region       |                     |                                           |
|             | BRCA1:NM_007294:c.5144G>A                         | rs45444999        | 51,29        | Known      |                                            |                     | YES                                       |
|             | BRCA1:NM_007294:c.5075-237C>A                     | rs8176257         | 66,67        |            | Out of pre-NGS method covered region       |                     |                                           |
|             | BRCA1:NM_007294:c.5074+65G>A                      | rs8176235         | 51,77        | Known      |                                            |                     | YES                                       |
|             | BRCA1:NM_007294:c.4987-68A>G                      | rs8176234         | 48,32        |            | Out of pre-NGS method covered region       |                     |                                           |
|             | BRCA1:NM_007294:c.4987-92A>G                      | rs8176233         | 46,79        |            | Out of pre-NGS method covered region       |                     |                                           |
|             | BRCA1:NM_007294:c.4986+222A>G                     | rs3092987         | 71,43        |            | Out of pre-NGS method covered region       |                     |                                           |
|             | BRCA1:NM_007294:c.4837A>G                         | rs1799966         | 53,83        | Known      |                                            |                     | YES                                       |
|             | BRCA1:NM_007294:c.4485-63C>G                      | rs8176212         | 52,48        | Known      |                                            |                     | YES                                       |
|             | BRCA1:NM_007294:c.4485-137T>A                     | rs2236762         | 47,32        |            | Out of pre-NGS method covered region       |                     |                                           |
|             | BRCA1:NM_007294:c.4358-2590T>G                    | rs8176194         | 45,41        |            | Out of pre-NGS method covered region       |                     |                                           |
|             | BRCA1:NM_007294:c.4358-2885G>A                    | rs8176193         | 47,98        |            | Out of pre-NGS method covered region       |                     |                                           |
|             | BRCA1:NM_007294:c.4308T>C                         | rs1060915         | 50,43        | Known      |                                            |                     | YES                                       |
|             | BRCA1:NM_007294:c.4097-141A>C                     | rs799916          | 50,83        |            | Out of pre-NGS method covered region       |                     |                                           |
|             | BRCA1:NM_007294:c.3548A>G                         | rs16942           | 41,54        | Known      |                                            |                     | YES                                       |
|             | BRCA1:NM_007294:c.3113A>G                         | rs16941           | 50,27        | Known      |                                            |                     | YES                                       |
|             | BRCA1:NM_007294:c.2612C>T                         | rs799917          | 50,78        | Known      |                                            |                     | YES                                       |
|             | <b>BRCA1:NM_007294:c.2397T&gt;A</b>               | <b>rs80357203</b> | <b>52,11</b> | <b>PAT</b> |                                            |                     | YES                                       |
|             | BRCA1:NM_007294:c.2311T>C                         | rs16940           | 51,76        | Known      |                                            |                     | YES                                       |
|             | BRCA1:NM_007294:c.2082C>T                         | rs1799949         | 49,38        | Known      |                                            |                     | YES                                       |
|             | BRCA1:NM_007294:c.594-225G>A                      | rs8176147         | 45,83        |            | Out of pre-NGS method covered region       |                     |                                           |
|             | BRCA1:NM_007294:c.593+167T>C                      | rs8176145         | 45,45        | Known      |                                            |                     | YES                                       |
|             | BRCA1:NM_007294:c.547+146A>T                      | rs8176140         | 36,67        |            | Out of pre-NGS method covered region       |                     |                                           |
|             | BRCA1:NM_007294:c.213-161A>G                      | rs799912          | 55,56        |            | Out of pre-NGS method covered region       |                     |                                           |
|             | BRCA1:NM_007294:c.1-134T>C                        | rs3765640         | 46,97        | Known      |                                            |                     | YES                                       |
|             | BRCA1:NM_007294:c.4485-203_4485-199delAACCC       | rs34250703        | 30,77        |            | Out of pre-NGS method covered region       |                     |                                           |
|             | BRCA1:NM_007294:c.548-58_548-58delT               | rs8176144         | 45,14        |            | Out of pre-NGS method covered region       |                     |                                           |
|             | BRCA1:NM_007294:c.441+64_441+64delT               | rs368252296       | 43,55        |            | Out of pre-NGS method covered region       |                     |                                           |
|             | BRCA1:NM_007294:c.441+52_441+63delCTTTTTTTTTT     | .                 | 81,33        |            | Out of pre-NGS method covered region       |                     |                                           |

Supplementary Table S4

|           |                                             |             |              |            |                                             |     |
|-----------|---------------------------------------------|-------------|--------------|------------|---------------------------------------------|-----|
|           | BRCA1:NM_007294:c.441+36_441+38delCTT       | rs147856441 | 45.96        |            | Out of pre-NGS method covered region        |     |
|           | BRCA1:NM_007294:c.134+224_134+224delT       | rs35149296  | 52.94        |            | Out of pre-NGS method covered region        |     |
| <b>T2</b> |                                             |             |              |            |                                             |     |
|           | APC:NM_001127510:c.136-230C>A               | rs2464805   | 100          |            | Out of pre-NGS method covered region        |     |
|           | APC:NM_001127510:c.423-256G>A               | rs392179    | 100          |            | Out of pre-NGS method covered region        |     |
|           | APC:NM_001127510:c.645+173A>G               | rs2289484   | 100          |            | Out of pre-NGS method covered region        |     |
|           | APC:NM_001127510:c.933+261G>T               | rs12656359  | 100          |            | Out of pre-NGS method covered region        |     |
|           | APC:NM_001127510:c.934-132G>T               | rs12521276  | 100          |            | Out of pre-NGS method covered region        |     |
|           | APC:NM_001127510:c.1458T>C                  | rs2229992   | 99.76        |            | Out of pre-NGS method covered region        |     |
|           | APC:NM_001127510:c.1635G>A                  | rs351771    | 99.91        |            | Out of pre-NGS method covered region        |     |
|           | APC:NM_001127510:c.1743+193G>A              | rs351772    | 100          |            | Out of pre-NGS method covered region        |     |
|           | APC:NM_001127510:c.4479G>A                  | rs41115     | 99.81        |            | Out of pre-NGS method covered region        |     |
|           | APC:NM_001127510:c.5034G>A                  | rs42427     | 99.82        |            | Out of pre-NGS method covered region        |     |
|           | APC:NM_001127510:c.5268T>G                  | rs866006    | 100          |            | Out of pre-NGS method covered region        |     |
|           | APC:NM_001127510:c.5465T>A                  | rs459552    | 99.55        |            | Out of pre-NGS method covered region        |     |
|           | APC:NM_001127510:c.5880G>A                  | rs465899    | 100          |            | Out of pre-NGS method covered region        |     |
|           | APC:NM_001127510:c.934-132_934-132delG      | rs141013063 | 58.82        |            | Out of pre-NGS method covered region        |     |
|           | APC:NM_001127510:c.934-120_934-119insG      | rs138003874 | 78.99        |            | Out of pre-NGS method covered region        |     |
|           | APC:NM_001127510:c.1959-145_1959-144insAGAA | rs3839284   | 98.57        |            | Out of pre-NGS method covered region        |     |
|           | <b>APC:NM_001127510:c.3921_3925delAAAAG</b> | .           | <b>44.81</b> | <b>PAT</b> |                                             | YES |
| <b>T3</b> |                                             |             |              |            |                                             |     |
|           | NF1:NM_000267:c.61-300C>T                   | rs2269856   | 100          |            | Out of pre-NGS method covered region        |     |
|           | NF1:NM_000267:c.61-123G>A                   | rs2269855   | 100          |            | Out of pre-NGS method covered region        |     |
|           | NF1:NM_000267:c.288+41G>A                   | rs2952976   | 99.74        |            | Could not be detected by RNA-based analysis |     |
|           | NF1:NM_000267:c.480-90C>T                   | rs2905807   | 99.17        |            | Out of pre-NGS method covered region        |     |
|           | NF1:NM_000267:c.702G>A                      | rs1801052   | 98.16        | Known      |                                             | YES |
|           | NF1:NM_000267:c.888+108C>T                  | rs2953000   | 100          |            | Out of pre-NGS method covered region        |     |
|           | NF1:NM_000267:c.888+118G>T                  | rs2952999   | 100          |            | Out of pre-NGS method covered region        |     |
|           | NF1:NM_000267:c.1393-130A>T                 | rs2905875   | 100          |            | Out of pre-NGS method covered region        |     |
|           | NF1:NM_000267:c.1393-32T>C                  | rs2905876   | 99.69        |            | Could not be detected by RNA-based analysis |     |
|           | NF1:NM_000267:c.1641+39T>C                  | rs2905880   | 99.76        |            | Could not be detected by RNA-based analysis |     |
|           | NF1:NM_000267:c.5205+23T>C                  | rs9894648   | 100          |            | Could not be detected by RNA-based analysis |     |
|           | NF1:NM_000267:c.5546+19T>A                  | rs2285894   | 99.42        |            | Could not be detected by RNA-based analysis |     |
|           | NF1:NM_000267:c.5546+117G>A                 | rs3815154   | 100          |            | Out of pre-NGS method covered region        |     |
|           | NF1:NM_000267:c.6085-29T>A                  | rs7406038   | 90.72        |            | Could not be detected by RNA-based analysis |     |
|           | NF1:NM_000267:c.6085-28T>A                  | rs7406039   | 99.32        |            | Could not be detected by RNA-based analysis |     |
|           | NF1:NM_000267:c.7126+37C>G                  | rs7405740   | 100          |            | Could not be detected by RNA-based analysis |     |
|           | NF1:NM_000267:c.7127-167T>A                 | rs2525569   | 100          |            | Out of pre-NGS method covered region        |     |
|           | NF1:NM_000267:c.7395-29G>A                  | rs964288    | 100          |            | Could not be detected by RNA-based analysis |     |
|           | <b>NF1:NM_000267:c.7739C&gt;G</b>           | .           | <b>48.72</b> | <b>PAT</b> |                                             | YES |
|           | NF1:NM_000267:c.7907+166C>T                 | rs7350943   | 100          |            | Could not be detected by RNA-based analysis |     |
|           | NF1:NM_000267:c.730+15_730+16insT           | .           | 25.39        |            | Could not be detected by RNA-based analysis |     |
|           | NF1:NM_000267:c.889-191_889-190insT         | rs35966725  | 100          |            | Out of pre-NGS method covered region        |     |
|           | NF1:NM_000267:c.1528-37_1528-36insT         | rs67472948  | 94.06        |            | Could not be detected by RNA-based analysis |     |
|           | NF1:NM_000267:c.2002-118_2002-117insAC      | rs141114572 | 39.71        |            | Out of pre-NGS method covered region        |     |
| <b>T4</b> |                                             |             |              |            |                                             |     |
|           | NF1:NM_000267:c.61-300C>T                   | rs2269856   | 100          |            | Out of pre-NGS method covered region        |     |
|           | NF1:NM_000267:c.61-123G>A                   | rs2269855   | 99.86        |            | Out of pre-NGS method covered region        |     |
|           | NF1:NM_000267:c.288+41G>A                   | rs2952976   | 99.53        |            | Could not be detected by RNA-based analysis |     |
|           | NF1:NM_000267:c.480-90C>T                   | rs2905807   | 100          |            | Could not be detected by RNA-based analysis |     |
|           | NF1:NM_000267:c.702G>A                      | rs1801052   | 98.91        | Known      |                                             | YES |
|           | NF1:NM_000267:c.888+108C>T                  | rs2953000   | 100          |            | Out of pre-NGS method covered region        |     |
|           | NF1:NM_000267:c.888+118G>T                  | rs2952999   | 100          |            | Out of pre-NGS method covered region        |     |
|           | NF1:NM_000267:c.1393-130A>T                 | rs2905875   | 100          |            | Out of pre-NGS method covered region        |     |
|           | NF1:NM_000267:c.1393-32T>C                  | rs2905876   | 100          |            | Could not be detected by RNA-based analysis |     |
|           | NF1:NM_000267:c.1641+39T>C                  | rs2905880   | 99.82        |            | Could not be detected by RNA-based analysis |     |
|           | NF1:NM_000267:c.1726C>G                     | .           | 48.55        | Known      |                                             | YES |
|           | NF1:NM_000267:c.5205+23T>C                  | rs9894648   | 100          |            | Could not be detected by RNA-based analysis |     |

Supplementary Table S4

|    |                                             |             |              |            |                                             |     |
|----|---------------------------------------------|-------------|--------------|------------|---------------------------------------------|-----|
|    | NF1:NM_000267:c.5546+19T>A                  | rs2285894   | 99,54        |            | Could not be detected by RNA-based analysis |     |
|    | NF1:NM_000267:c.5546+117G>A                 | rs3815154   | 100          |            | Out of pre-NGS method covered region        |     |
|    | NF1:NM_000267:c.6085-29T>A                  | rs7406038   | 90,16        |            | Could not be detected by RNA-based analysis |     |
|    | NF1:NM_000267:c.6085-28T>A                  | rs7406039   | 95,56        |            | Could not be detected by RNA-based analysis |     |
|    | NF1:NM_000267:c.7126+37C>G                  | rs7405740   | 99,51        |            | Could not be detected by RNA-based analysis |     |
|    | NF1:NM_000267:c.7127-167T>A                 | rs2525569   | 100          |            | Out of pre-NGS method covered region        |     |
|    | NF1:NM_000267:c.7395-29G>A                  | rs964288    | 100          |            | Could not be detected by RNA-based analysis |     |
|    | NF1:NM_000267:c.7907+166C>T                 | rs7350943   | 100          |            | Out of pre-NGS method covered region        |     |
|    | NF1:NM_000267:c.730+15_730+16insT           | .           | 27,34        |            | Could not be detected by RNA-based analysis |     |
|    | NF1:NM_000267:c.889-191_889-190insT         | rs35966725  | 100          |            | Out of pre-NGS method covered region        |     |
|    | NF1:NM_000267:c.1528-37_1528-36insT         | rs67472948  | 96,02        |            | Could not be detected by RNA-based analysis |     |
|    | NF1:NM_000267:c.2002-118_2002-117insAC      | rs141114572 | 44,44        |            | Out of pre-NGS method covered region        |     |
|    | <b>NF1:NM_000267:c.3860_3861insTT</b>       | .           | <b>44,39</b> | <b>PAT</b> | Could not be detected by RNA-based analysis | YES |
|    | NF1:NM_000267:c.6085-31_6085-30insA         | .           | 34,49        |            | Could not be detected by RNA-based analysis |     |
| T5 |                                             |             |              |            |                                             |     |
|    | BRCA2:NM_000059:c.793+98G>A                 | rs206073    | 100          |            | Out of pre-NGS method covered region        |     |
|    | BRCA2:NM_000059:c.3807T>C                   | rs543304    | 99,27        | Known      |                                             | YES |
|    | BRCA2:NM_000059:c.4563A>G                   | rs206075    | 99,42        |            | Could not be detected by CSCE               |     |
|    | BRCA2:NM_000059:c.6513G>C                   | rs206076    | 99,62        |            | Could not be detected by CSCE               |     |
|    | BRCA2:NM_000059:c.6938-120T>C               | rs206080    | 98,97        |            | Out of pre-NGS method covered region        |     |
|    | BRCA2:NM_000059:c.7397T>C                   | rs169547    | 99,81        |            | Could not be detected by CSCE               |     |
|    | BRCA2:NM_000059:c.7435+207T>A               | .           | 57,14        |            | Out of pre-NGS method covered region        |     |
|    | BRCA2:NM_000059:c.7617+190G>A               | rs206096    | 100          |            | Out of pre-NGS method covered region        |     |
|    | BRCA2:NM_000059:c.9501+178A>G               | rs206343    | 100          |            | Out of pre-NGS method covered region        |     |
|    | BRCA2:NM_000059:c.10257+105A>C              | rs15869     | 100          |            | Out of pre-NGS method covered region        |     |
|    | BRCA1:NM_007294:c.5407-193A>G               | rs8176310   | 100          |            | Out of pre-NGS method covered region        |     |
|    | BRCA1:NM_007294:c.5333-153A>G               | rs8176305   | 40,54        |            | Out of pre-NGS method covered region        |     |
|    | BRCA1:NM_007294:c.5278-191A>T               | rs8176297   | 100          |            | Out of pre-NGS method covered region        |     |
|    | BRCA1:NM_007294:c.5152+66G>A                | rs3092994   | 100          |            | Out of pre-NGS method covered region        |     |
|    | BRCA1:NM_007294:c.5075-53C>T                | rs8176258   | 57,73        | Known      |                                             | YES |
|    | BRCA1:NM_007294:c.5075-237C>A               | rs8176257   | 60           |            | Out of pre-NGS method covered region        |     |
|    | BRCA1:NM_007294:c.5075-238A>G               | rs8176256   | 35           |            | Out of pre-NGS method covered region        |     |
|    | BRCA1:NM_007294:c.5074+65G>A                | rs8176235   | 44,9         | Known      |                                             | YES |
|    | BRCA1:NM_007294:c.4987-68A>G                | rs8176234   | 100          |            | Out of pre-NGS method covered region        |     |
|    | BRCA1:NM_007294:c.4987-92A>G                | rs8176233   | 97,96        |            | Out of pre-NGS method covered region        |     |
|    | BRCA1:NM_007294:c.4986+222A>G               | rs3092987   | 100          |            | Out of pre-NGS method covered region        |     |
|    | BRCA1:NM_007294:c.4837A>G                   | rs1799966   | 99,3         | Known      |                                             | YES |
|    | BRCA1:NM_007294:c.4675+245G>A               | rs141660808 | 53,85        |            | Out of pre-NGS method covered region        |     |
|    | BRCA1:NM_007294:c.4485-63C>G                | rs8176212   | 98,75        | Known      |                                             | YES |
|    | BRCA1:NM_007294:c.4485-137T>A               | rs2236762   | 100          |            | Out of pre-NGS method covered region        |     |
|    | BRCA1:NM_007294:c.4358-2590T>G              | rs8176194   | 100          |            | Out of pre-NGS method covered region        |     |
|    | BRCA1:NM_007294:c.4358-2885G>A              | rs8176193   | 99,51        |            | Out of pre-NGS method covered region        |     |
|    | BRCA1:NM_007294:c.4357+117G>A               | rs3737559   | 49,25        |            | Out of pre-NGS method covered region        |     |
|    | BRCA1:NM_007294:c.4308T>C                   | rs1060915   | 99,54        | Known      |                                             | YES |
|    | BRCA1:NM_007294:c.4097-141A>C               | rs799916    | 99,14        |            | Could not be detected by CSCE               |     |
|    | BRCA1:NM_007294:c.3548A>G                   | rs16942     | 99,28        | Known      |                                             | YES |
|    | BRCA1:NM_007294:c.3113A>G                   | rs16941     | 99,14        | Known      |                                             | YES |
|    | BRCA1:NM_007294:c.2612C>T                   | rs799917    | 99,61        | Known      |                                             | YES |
|    | BRCA1:NM_007294:c.2311T>C                   | rs16940     | 99,28        | Known      |                                             | YES |
|    | BRCA1:NM_007294:c.2082C>T                   | rs1799949   | 99,73        | Known      |                                             | YES |
|    | BRCA1:NM_007294:c.2077G>A                   | rs4986850   | 49,54        | Known      |                                             | YES |
|    | BRCA1:NM_007294:c.594-225G>A                | rs8176147   | 100          |            | Out of pre-NGS method covered region        |     |
|    | BRCA1:NM_007294:c.593+167T>C                | rs8176145   | 100          | Known      |                                             | YES |
|    | BRCA1:NM_007294:c.547+146A>T                | rs8176140   | 100          |            | Out of pre-NGS method covered region        |     |
|    | BRCA1:NM_007294:c.441+36C>T                 | rs45569832  | 62,5         |            | Out of pre-NGS method covered region        |     |
|    | BRCA1:NM_007294:c.213-161A>G                | rs799912    | 100          |            | Out of pre-NGS method covered region        |     |
|    | BRCA1:NM_007294:c.1-134T>C                  | rs3765640   | 100          | Known      |                                             | YES |
|    | BRCA1:NM_007294:c.4485-203_4485-199delAACCC | rs34250703  | 54,39        |            | Out of pre-NGS method covered region        |     |

Supplementary Table S4

|           |                                                   |                    |              |            |                                      |  |                                   |
|-----------|---------------------------------------------------|--------------------|--------------|------------|--------------------------------------|--|-----------------------------------|
|           | <b>BRCA1:NM_007294:c.1961_1961delA</b>            | <b>rs80357522</b>  | <b>43.32</b> | <b>PAT</b> |                                      |  | NO, variant in homopolymer region |
|           | BRCA1:NM_007294:c.548-58_548-58delT               | rs8176144          | 92.95        |            | Out of pre-NGS method covered region |  |                                   |
|           | BRCA1:NM_007294:c.441+52_441+63delCTTTTTTTTTT     | .                  | 95.71        |            | Out of pre-NGS method covered region |  |                                   |
|           | BRCA1:NM_007294:c.441+36_441+38delCTT             | rs147856441        | 97.97        |            | Out of pre-NGS method covered region |  |                                   |
| <b>T6</b> |                                                   |                    |              |            |                                      |  |                                   |
|           | <b>MLH1:NM_000249:c.306+5G&gt;A</b>               | <b>rs267607735</b> | <b>46.33</b> | <b>PAT</b> |                                      |  | YES                               |
|           | MLH1:NM_000249:c.453+79A>G                        | rs4234259          | 100          |            | Out of pre-NGS method covered region |  |                                   |
|           | MLH1:NM_000249:c.655A>G                           | rs1799977          | 45.41        | Known      |                                      |  | YES                               |
|           | MLH1:NM_000249:c.1038+86T>C                       | rs2286939          | 100          | Known      |                                      |  | YES                               |
|           | MLH1:NM_000249:c.1668-19A>G                       | rs9876116          | 100          | Known      |                                      |  | YES                               |
|           | MLH1:NM_000249:c.1990-121C>T                      | rs2241031          | 100          | Known      |                                      |  | NO, variant in low covered region |
|           | MLH1:NM_000249:c.1897-167_1897-167delT            | rs11290150         | 100          |            | Out of pre-NGS method covered region |  |                                   |
| <b>T7</b> |                                                   |                    |              |            |                                      |  |                                   |
|           | BRCA2:NM_000059:c.793+98G>A                       | rs206073           | 99.59        |            | Out of pre-NGS method covered region |  | YES                               |
|           | BRCA2:NM_000059:c.3807T>C                         | rs543304           | 99.78        | Known      |                                      |  |                                   |
|           | BRCA2:NM_000059:c.4563A>G                         | rs206075           | 100          |            | Could not be detected by CSCE        |  |                                   |
|           | BRCA2:NM_000059:c.6513G>C                         | rs206076           | 100          |            | Could not be detected by CSCE        |  |                                   |
|           | BRCA2:NM_000059:c.6938-120T>C                     | rs206080           | 100          |            | Could not be detected by CSCE        |  |                                   |
|           | BRCA2:NM_000059:c.7397T>C                         | rs169547           | 100          |            | Could not be detected by CSCE        |  |                                   |
|           | BRCA2:NM_000059:c.7617+190G>A                     | rs206096           | 100          |            | Out of pre-NGS method covered region |  |                                   |
|           | BRCA2:NM_000059:c.9501+178A>G                     | rs206343           | 100          |            | Out of pre-NGS method covered region |  |                                   |
|           | BRCA2:NM_000059:c.10257+105A>C                    | rs15869            | 98.06        |            | Out of pre-NGS method covered region |  |                                   |
|           | <b>BRCA2:NM_000059:c.949_950insA</b>              | .                  | <b>43.17</b> | <b>PAT</b> |                                      |  | NO, variant in homopolymer region |
|           | BRCA1:NM_007294:c.5407-193A>G                     | rs8176310          | 100          |            | Out of pre-NGS method covered region |  |                                   |
|           | BRCA1:NM_007294:c.5333-153A>G                     | rs8176305          | 46.56        |            | Out of pre-NGS method covered region |  |                                   |
|           | BRCA1:NM_007294:c.5278-191A>T                     | rs8176297          | 98.96        |            | Out of pre-NGS method covered region |  |                                   |
|           | BRCA1:NM_007294:c.5152+66G>A                      | rs3092994          | 100          |            | Out of pre-NGS method covered region |  |                                   |
|           | BRCA1:NM_007294:c.5075-237C>A                     | rs8176257          | 41.18        |            | Out of pre-NGS method covered region |  |                                   |
|           | BRCA1:NM_007294:c.5075-238A>G                     | rs8176256          | 58.82        |            | Out of pre-NGS method covered region |  |                                   |
|           | BRCA1:NM_007294:c.5074+65G>A                      | rs8176235          | 44.33        | Known      |                                      |  | YES                               |
|           | BRCA1:NM_007294:c.4987-68A>G                      | rs8176234          | 99.49        |            | Out of pre-NGS method covered region |  |                                   |
|           | BRCA1:NM_007294:c.4987-92A>G                      | rs8176233          | 97.84        |            | Out of pre-NGS method covered region |  |                                   |
|           | BRCA1:NM_007294:c.4986+222A>G                     | rs3092987          | 100          |            | Out of pre-NGS method covered region |  |                                   |
|           | BRCA1:NM_007294:c.4837A>G                         | rs1799966          | 99.29        | Known      |                                      |  | YES                               |
|           | BRCA1:NM_007294:c.4485-63C>G                      | rs8176212          | 99.46        | Known      |                                      |  | YES                               |
|           | BRCA1:NM_007294:c.4485-137T>A                     | rs2236762          | 99.41        |            | Out of pre-NGS method covered region |  |                                   |
|           | BRCA1:NM_007294:c.4358-2590T>G                    | rs8176194          | 98.65        |            | Out of pre-NGS method covered region |  |                                   |
|           | BRCA1:NM_007294:c.4358-2885G>A                    | rs8176193          | 100          |            | Out of pre-NGS method covered region |  |                                   |
|           | BRCA1:NM_007294:c.4357+117G>A                     | rs3737559          | 75.36        |            | Out of pre-NGS method covered region |  |                                   |
|           | BRCA1:NM_007294:c.4308T>C                         | rs1060915          | 99.48        | Known      |                                      |  | YES                               |
|           | BRCA1:NM_007294:c.4097-141A>C                     | rs799916           | 100          |            | Out of pre-NGS method covered region |  |                                   |
|           | BRCA1:NM_007294:c.3548A>G                         | rs16942            | 100          | Known      |                                      |  | YES                               |
|           | BRCA1:NM_007294:c.3113A>G                         | rs16941            | 99.67        |            | Could not be detected by CSCE        |  |                                   |
|           | BRCA1:NM_007294:c.2612C>T                         | rs799917           | 99.02        | Known      |                                      |  | YES                               |
|           | BRCA1:NM_007294:c.2311T>C                         | rs16940            | 99.46        | Known      |                                      |  | YES                               |
|           | BRCA1:NM_007294:c.2082C>T                         | rs1799949          | 98.81        | Known      |                                      |  | YES                               |
|           | BRCA1:NM_007294:c.2077G>A                         | rs4986850          | 46.48        | Known      |                                      |  | YES                               |
|           | BRCA1:NM_007294:c.594-225G>A                      | rs8176147          | 100          |            | Out of pre-NGS method covered region |  |                                   |
|           | BRCA1:NM_007294:c.593+167T>C                      | rs8176145          | 100          |            | Out of pre-NGS method covered region |  |                                   |
|           | BRCA1:NM_007294:c.547+146A>T                      | rs8176140          | 100          |            | Out of pre-NGS method covered region |  |                                   |
|           | BRCA1:NM_007294:c.441+36C>T                       | rs45569832         | 55.56        |            | Out of pre-NGS method covered region |  |                                   |
|           | BRCA1:NM_007294:c.213-161A>G                      | rs799912           | 100          |            | Out of pre-NGS method covered region |  |                                   |
|           | BRCA1:NM_007294:c.1-134T>C                        | rs3765640          | 90.91        |            | Out of pre-NGS method covered region |  |                                   |
|           | BRCA1:NM_007294:c.5277+59_5277+60insGTATTCCTACTCC | .                  | 46.04        | Known      |                                      |  | YES                               |
|           | BRCA1:NM_007294:c.4485-203_4485-199delAACCC       | rs34250703         | 70.21        |            | Out of pre-NGS method covered region |  |                                   |
|           | BRCA1:NM_007294:c.548-58_548-58delT               | rs8176144          | 93.54        |            | Out of pre-NGS method covered region |  |                                   |
|           | BRCA1:NM_007294:c.441+52_441+63delCTTTTTTTTTT     | .                  | 93.23        |            | Out of pre-NGS method covered region |  |                                   |
|           | BRCA1:NM_007294:c.441+36_441+38delCTT             | rs147856441        | 96.59        |            | Out of pre-NGS method covered region |  |                                   |

Supplementary Table S4

|     |                                                  |             |                     |            |                                                            |  |                                   |
|-----|--------------------------------------------------|-------------|---------------------|------------|------------------------------------------------------------|--|-----------------------------------|
|     | BRCA1:NM_007294:c.134+224_134+224delT            | rs35149296  | 62.5                |            | Out of pre-NGS method covered region                       |  |                                   |
| T8  |                                                  |             |                     |            |                                                            |  |                                   |
|     | MSH6:NM_000179:c.186C>A                          | rs1042820   | 100                 |            | Could not be detected by D-HPLC                            |  |                                   |
|     | MSH6:NM_000179:c.260+22C>G                       | rs55927047  | 100                 |            | Could not be detected by D-HPLC                            |  |                                   |
|     | MSH6:NM_000179:c.276A>G                          | rs1800932   | 98,05               | Known      |                                                            |  | YES                               |
|     | MSH6:NM_000179:c.457+52T>A                       | rs3136282   | 98,54               | Known      |                                                            |  | YES                               |
|     | MSH6:NM_000179:c.457+217G>T                      | rs3136283   | 100                 |            | Out of pre-NGS method covered region                       |  |                                   |
|     | MSH6:NM_000179:c.458-273A>G                      | rs3136315   | 100                 |            | Out of pre-NGS method covered region                       |  |                                   |
|     | MSH6:NM_000179:c.458-133A>G                      | rs3136316   | 99,15               | Known      |                                                            |  | NO, variant in low covered region |
|     | MSH6:NM_000179:c.540T>C                          | rs1800935   | 99,09               | Known      |                                                            |  | YES                               |
|     | MSH6:NM_000179:c.3173-101G>C                     | rs2072447   | 100                 | Known      |                                                            |  | YES                               |
|     | MSH6:NM_000179:c.3438+14A>T                      | rs2020911   | 99,57               |            | Could not be detected by D-HPLC                            |  |                                   |
|     | MSH6:NM_000179:c.3556+146G>A                     | rs7562048   | 100                 | Known      |                                                            |  | NO, variant in low covered region |
|     | MSH6:NM_000179:c.3646+91T>C                      | rs3136359   | 100                 | Known      |                                                            |  | YES                               |
|     | MSH6:NM_000179:c.3802-40C>G                      | rs3136367   | 99,6                | Known      |                                                            |  | YES                               |
|     | <b>MSH6:NM_000179:c.3254_3254delC</b>            | .           | <b>46.39</b>        | <b>PAT</b> |                                                            |  | NO, variant in homopolymer region |
|     | MSH6:NM_000179:c.3557-18_3557-17insT             | .           | 90,24               |            | Could not be detected by D-HPLC                            |  |                                   |
|     | MSH6:NM_000179:c.3646+29_3646+32delCTAT          | rs2234731   | 88,42               | Known      |                                                            |  | YES                               |
|     | MSH6:NM_000179:c.4002-27_4002-27delT             | .           | 34,74               |            | Out of pre-NGS method covered region                       |  |                                   |
| T9  |                                                  |             |                     |            |                                                            |  |                                   |
|     | NF1:NM_000267:c.61-300C>T                        | rs2269856   | 51,35               |            | Out of pre-NGS method covered region                       |  |                                   |
|     | NF1:NM_000267:c.2034G>A                          | rs2285892   | 100                 | Known      |                                                            |  | YES                               |
|     | NF1:NM_000267:c.3197+139T>C                      | rs2071009   | 100                 |            | Out of pre-NGS method covered region                       |  |                                   |
|     | NF1:NM_000267:c.3315-130G>C                      | rs2072131   | 99,75               |            | Out of pre-NGS method covered region                       |  |                                   |
|     | NF1:NM_000267:c.3496+33C>A                       | rs2066736   | 100                 |            | Could not be detected by RNA-based analysis                |  |                                   |
|     | NF1:NM_000267:c.3974+46T>G                       | rs72813695  | 83,3                |            | Could not be detected by RNA-based analysis                |  |                                   |
|     | <b>NF1:NM_000267:c.4306A&gt;G</b>                | .           | <b>48,37</b>        | <b>PAT</b> |                                                            |  | YES                               |
|     | NF1:NM_000267:c.4772+193T>C                      | rs7221954   | 55,43               |            | Out of pre-NGS method covered region                       |  |                                   |
|     | NF1:NM_000267:c.5205+23T>C                       | rs9894648   | 48,12               |            | Could not be detected by RNA-based analysis                |  |                                   |
|     | NF1:NM_000267:c.5944-179A>C                      | rs10853138  | 100                 |            | Out of pre-NGS method covered region                       |  |                                   |
|     | NF1:NM_000267:c.6085-28T>A                       | rs7406039   | 50,06               |            | Could not be detected by RNA-based analysis                |  |                                   |
|     | NF1:NM_000267:c.6579+45T>A                       | rs17883614  | 48,28               |            | Could not be detected by RNA-based analysis                |  |                                   |
|     | NF1:NM_000267:c.7126+37C>G                       | rs7405740   | 100                 |            | Could not be detected by RNA-based analysis                |  |                                   |
|     | NF1:NM_000267:c.8097+55T>C                       | rs143138479 | 47,06               |            | Could not be detected by RNA-based analysis                |  |                                   |
|     | NF1:NM_000267:c.2002-118_2002-117insACACACACACAC | .           | 33,85               |            | Out of pre-NGS method covered region                       |  |                                   |
|     | NF1:NM_000267:c.3974+33_3974+34insTG             | .           | 67,97               |            | Could not be detected by RNA-based analysis                |  |                                   |
|     | NF1:NM_000267:c.6085-30_6085-29insA              | rs66638017  | 37,03               |            | Could not be detected by RNA-based analysis                |  |                                   |
| T10 |                                                  |             |                     |            |                                                            |  |                                   |
|     | MSH6:NM_000179:c.116G>A                          | rs1042821   | 100                 |            | Region not analyzed by pre-NGS method                      |  |                                   |
|     | <b>MSH6:NM_000179:c.255dupC</b>                  | .           | <b>Not detected</b> | <b>PAT</b> | <b>Low coverage region – detected by Sanger sequencing</b> |  | NO, variant in low covered region |
|     | MSH6:NM_000179:c.458-133A>G                      | rs3136316   | 100                 |            | Out of pre-NGS method covered region                       |  |                                   |
|     | MSH6:NM_000179:c.458-52G>T                       | rs1800934   | 100                 |            | Out of pre-NGS method covered region                       |  |                                   |
|     | MSH6:NM_000179:c.3173-101G>C                     | rs2072447   | 100                 |            | Out of pre-NGS method covered region                       |  |                                   |
|     | MSH6:NM_000179:c.3556+146G>A                     | rs7562048   | 100                 |            | Out of pre-NGS method covered region                       |  |                                   |
|     | MSH6:NM_000179:c.3646+91T>C                      | rs3136359   | 100                 |            | Out of pre-NGS method covered region                       |  |                                   |
|     | MSH6:NM_000179:c.3802-40C>G                      | rs3136367   | 100                 |            | Region not analyzed by pre-NGS method                      |  |                                   |
|     | MSH6:NM_000179:c.3557-18_3557-17insT             | .           | 37,5                |            | Region not analyzed by pre-NGS method                      |  |                                   |
|     | MSH6:NM_000179:c.3646+29_3646+32delCTAT          | rs2234731   | 89,53               |            | Region not analyzed by pre-NGS method                      |  |                                   |
|     | MSH6:NM_000179:c.4002-27_4002-27delT             | .           | 42,83               |            | Region not analyzed by pre-NGS method                      |  |                                   |
| T11 |                                                  |             |                     |            |                                                            |  |                                   |
|     | NF1:NM_000267:c.61-123G>A                        | rs2269855   | 100                 |            | Out of pre-NGS method covered region                       |  |                                   |
|     | NF1:NM_000267:c.288+41G>A                        | rs2952976   | 100                 |            | Could not be detected by RNA-based analysis                |  |                                   |
|     | NF1:NM_000267:c.480-90C>T                        | rs2905807   | 100                 |            | Out of pre-NGS method covered region                       |  |                                   |
|     | NF1:NM_000267:c.702G>A                           | rs1801052   | 97,47               | Known      |                                                            |  | YES                               |
|     | NF1:NM_000267:c.730+85A>T                        | .           | 20,57               |            | Could not be detected by RNA-based analysis                |  |                                   |
|     | NF1:NM_000267:c.888+108C>T                       | rs2953000   | 100                 |            | Out of pre-NGS method covered region                       |  |                                   |
|     | NF1:NM_000267:c.888+118G>T                       | rs2952999   | 100                 |            | Out of pre-NGS method covered region                       |  |                                   |
|     | NF1:NM_000267:c.1393-130A>T                      | rs2905875   | 100                 |            | Out of pre-NGS method covered region                       |  |                                   |

|            |                                             |             |              |            |                                             |            |
|------------|---------------------------------------------|-------------|--------------|------------|---------------------------------------------|------------|
|            | NF1:NM_000267:c.1393-32T>C                  | rs2905876   | 100          |            | Could not be detected by RNA-based analysis |            |
|            | NF1:NM_000267:c.1641+39T>C                  | rs2905880   | 100          |            | Could not be detected by RNA-based analysis |            |
|            | NF1:NM_000267:c.1642-158A>G                 | rs17883230  | 70.59        |            | Out of pre-NGS method covered region        |            |
|            | NF1:NM_000267:c.2851-127G>A                 | rs181022226 | 62.86        |            | Out of pre-NGS method covered region        |            |
|            | NF1:NM_000267:c.5205+23T>C                  | rs9894648   | 51.64        |            | Could not be detected by RNA-based analysis |            |
|            | NF1:NM_000267:c.5546+19T>A                  | rs2285894   | 47.42        |            | Could not be detected by RNA-based analysis |            |
|            | NF1:NM_000267:c.5546+117G>A                 | rs3815154   | 41.22        |            | Could not be detected by RNA-based analysis |            |
|            | NF1:NM_000267:c.6085-29T>A                  | rs7406038   | 42.05        |            | Could not be detected by RNA-based analysis |            |
|            | NF1:NM_000267:c.6085-28T>A                  | rs7406039   | 47.78        |            | Could not be detected by RNA-based analysis |            |
|            | NF1:NM_000267:c.7126+37C>G                  | rs7405740   | 50           |            | Could not be detected by RNA-based analysis |            |
|            | NF1:NM_000267:c.7395-29G>A                  | rs964288    | 41.51        |            | Could not be detected by RNA-based analysis |            |
|            | NF1:NM_000267:c.730+15_730+16insT           | .           | 29.59        |            | Could not be detected by RNA-based analysis |            |
|            | NF1:NM_000267:c.1528-37_1528-36insT         | rs67472948  | 94.59        |            | Could not be detected by RNA-based analysis |            |
|            | NF1:NM_000267:c.2002-118_2002-117insACAC    | rs141114572 | 28           |            | Out of pre-NGS method covered region        |            |
|            | <b>NF1:NM_000267: exons 33-36 deletion</b>  |             |              | <b>PAT</b> |                                             | <b>YES</b> |
| <b>T12</b> |                                             |             |              |            |                                             |            |
|            | NF2:NM_000268:c.1-110G>C                    | rs1800540   | 100          |            | Out of pre-NGS method covered region        |            |
|            | NF2:NM_000268:c.240+171T>A                  | rs2530662   | 100          |            | Out of pre-NGS method covered region        |            |
|            | NF2:NM_000268:c.241-58G>A                   | rs79901896  | 100          |            | Could not be detected by RNA-based analysis |            |
|            | NF2:NM_000268:c.517-150C>T                  | rs6006220   | 46.78        |            | Out of pre-NGS method covered region        |            |
|            | NF2:NM_000268:c.600-154G>A                  | rs2071622   | 55           |            | Out of pre-NGS method covered region        |            |
|            | NF2:NM_000268:c.886-205C>T                  | rs2252472   | 45.95        |            | Out of pre-NGS method covered region        |            |
|            | NF2:NM_000268:c.1574+173G>A                 | rs56188151  | 46.15        |            | Out of pre-NGS method covered region        |            |
|            | NF2:NM_000268:c.1575-67G>A                  | rs140086    | 99.53        |            | Could not be detected by RNA-based analysis |            |
|            | NF2:NM_000268:c.1737+1623T>C                | rs7291645   | 60.29        |            | Out of pre-NGS method covered region        |            |
|            | NF2:NM_000268:c.599+41_599+41delT           | .           | 28.98        |            | Could not be detected by RNA-based analysis |            |
|            | NF2:NM_000268:c.885+173_885+173delT         | rs35328234  | 57.89        |            | Could not be detected by RNA-based analysis |            |
|            | NF2:NM_000268:c.1447-227_1447-226insTGAGGGA | rs3842713   | 31.71        |            | Out of pre-NGS method covered region        |            |
|            | <b>NF2:NM_000268: exons 1-5 deletion</b>    |             |              | <b>PAT</b> |                                             | <b>YES</b> |
| <b>T13</b> |                                             |             |              |            |                                             |            |
|            | NF1:NM_000267:c.61-300C>T                   | rs2269856   | 100          |            | Out of pre-NGS method covered region        |            |
|            | NF1:NM_000267:c.61-123G>A                   | rs2269855   | 100          |            | Out of pre-NGS method covered region        |            |
|            | NF1:NM_000267:c.288+41G>A                   | rs2952976   | 100          |            | Could not be detected by RNA-based analysis |            |
|            | NF1:NM_000267:c.480-90C>T                   | rs2905807   | 100          |            | Out of pre-NGS method covered region        |            |
|            | NF1:NM_000267:c.702G>A                      | rs1801052   | 98.48        | Known      |                                             | <b>YES</b> |
|            | NF1:NM_000267:c.888+108C>T                  | rs2953000   | 100          |            | Out of pre-NGS method covered region        |            |
|            | NF1:NM_000267:c.888+118G>T                  | rs2952999   | 100          |            | Out of pre-NGS method covered region        |            |
|            | NF1:NM_000267:c.1393-130A>T                 | rs2905875   | 98.66        |            | Out of pre-NGS method covered region        |            |
|            | NF1:NM_000267:c.1393-32T>C                  | rs2905876   | 99.78        |            | Could not be detected by RNA-based analysis |            |
|            | NF1:NM_000267:c.1641+39T>C                  | rs2905880   | 100          |            | Could not be detected by RNA-based analysis |            |
|            | NF1:NM_000267:c.4368-46G>C                  | rs17881285  | 50.72        |            | Could not be detected by RNA-based analysis |            |
|            | NF1:NM_000267:c.5205+23T>C                  | rs9894648   | 47.8         |            | Could not be detected by RNA-based analysis |            |
|            | NF1:NM_000267:c.5546+19T>A                  | rs2285894   | 49.56        |            | Could not be detected by RNA-based analysis |            |
|            | NF1:NM_000267:c.5546+117G>A                 | rs3815154   | 52.2         |            | Out of pre-NGS method covered region        |            |
|            | NF1:NM_000267:c.6085-29T>A                  | rs7406038   | 45.93        |            | Could not be detected by RNA-based analysis |            |
|            | NF1:NM_000267:c.6085-28T>A                  | rs7406039   | 48.88        |            | Could not be detected by RNA-based analysis |            |
|            | <b>NF1:NM_000267:c.6365-2A&gt;G</b>         | .           | <b>45.71</b> | <b>PAT</b> |                                             | <b>YES</b> |
|            | NF1:NM_000267:c.7126+37C>G                  | rs7405740   | 43.85        |            | Could not be detected by RNA-based analysis |            |
|            | NF1:NM_000267:c.7395-29G>A                  | rs964288    | 55.22        |            | Could not be detected by RNA-based analysis |            |
|            | NF1:NM_000267:c.7907+166C>T                 | rs7350943   | 45.45        |            | Out of pre-NGS method covered region        |            |
|            | NF1:NM_000267:c.8097+30G>T                  | .           | 27.54        |            | Could not be detected by RNA-based analysis |            |
|            | NF1:NM_000267:c.8097+71A>T                  | .           | 30.61        |            | Could not be detected by RNA-based analysis |            |
|            | NF1:NM_000267:c.8097+76C>A                  | .           | 26.19        |            | Could not be detected by RNA-based analysis |            |
|            | NF1:NM_000267:c.730+15_730+16insT           | .           | 27.83        |            | Could not be detected by RNA-based analysis |            |
|            | NF1:NM_000267:c.889-191_889-190insT         | rs35966725  | 100          |            | Out of pre-NGS method covered region        |            |
|            | NF1:NM_000267:c.1528-37_1528-36insT         | rs67472948  | 94.58        |            | Could not be detected by RNA-based analysis |            |
|            | NF1:NM_000267:c.2002-118_2002-117insAC      | rs141114572 | 62.39        |            | Out of pre-NGS method covered region        |            |
| <b>T14</b> |                                             |             |              |            |                                             |            |



Supplementary Table S4

|            |                                                          |             |              |            |                                       |                                   |
|------------|----------------------------------------------------------|-------------|--------------|------------|---------------------------------------|-----------------------------------|
|            | <b>APC:NM_001127510:c.423-3T&gt;A</b>                    | .           | <b>44,24</b> | <b>PAT</b> |                                       | YES                               |
|            | APC:NM_001127510:c.645+173A>G                            | rs2289484   | 48,48        | Known      |                                       | YES                               |
|            | APC:NM_001127510:c.1458T>C                               | rs2229992   | 49,55        | Known      |                                       | YES                               |
|            | APC:NM_001127510:c.1635G>A                               | rs351771    | 46,6         | Known      |                                       | YES                               |
|            | APC:NM_001127510:c.1743+193G>A                           | rs351772    | 47,62        |            | Out of pre-NGS method covered region  |                                   |
|            | APC:NM_001127510:c.4479G>A                               | rs41115     | 42,42        | Known      |                                       | YES                               |
|            | APC:NM_001127510:c.5034G>A                               | rs42427     | 55,11        | Known      |                                       | YES                               |
|            | APC:NM_001127510:c.5268T>G                               | rs866006    | 50,91        | Known      |                                       | YES                               |
|            | APC:NM_001127510:c.5465T>A                               | rs459552    | 100          | Known      |                                       | YES                               |
|            | APC:NM_001127510:c.5880G>A                               | rs465899    | 52,59        | Known      |                                       | YES                               |
|            | APC:NM_001127510:c.934-120_934-119insG                   | rs138003874 | 26,76        |            | Out of pre-NGS method covered region  |                                   |
|            | APC:NM_001127510:c.1959-145_1959-144insAGAA              | rs3839284   | 47,69        |            | Out of pre-NGS method covered region  |                                   |
| <b>T15</b> |                                                          |             |              |            |                                       |                                   |
|            | MSH2:NM_000251:c.943-161C>T                              | rs17224276  | 48,65        |            | Out of pre-NGS method covered region  |                                   |
|            | MSH2:NM_000251:c.1077-80G>A                              | rs2347794   | 57,6         |            | Out of pre-NGS method covered region  |                                   |
|            | MSH2:NM_000251:c.1277-118G>A                             | rs1981929   | 50,29        |            | Out of pre-NGS method covered region  |                                   |
|            | MSH2:NM_000251:c.1661+90T>C                              | rs10183143  | 49,43        |            | Out of pre-NGS method covered region  |                                   |
|            | MSH2:NM_000251:c.2006-127C>T                             | rs2059521   | 100          |            | Out of pre-NGS method covered region  |                                   |
|            | MSH2:NM_000251:c.2210+175G>A                             | rs4583514   | 32,14        |            | Out of pre-NGS method covered region  |                                   |
|            | MSH2:NM_000251:c.2635-111T>A                             | rs6737098   | 53,63        |            | Out of pre-NGS method covered region  |                                   |
|            | <b>MSH2:NM_000251:c.597_598insT</b>                      | .           | <b>47,18</b> | <b>PAT</b> |                                       | NO, variant in homopolymer region |
|            | MSH2:NM_000251:c.1276+117_1276+117delT                   | .           | 22,41        |            | Out of pre-NGS method covered region  |                                   |
| <b>T16</b> |                                                          |             |              |            |                                       |                                   |
|            | BRCA2:NM_000059:c.1-26G>A                                | rs1799943   | 49,36        |            | Out of pre-NGS method covered region  |                                   |
|            | BRCA2:NM_000059:c.425+246G>C                             | rs11571613  | 100          |            | Out of pre-NGS method covered region  |                                   |
|            | BRCA2:NM_000059:c.631+183T>A                             | rs3752451   | 100          |            | Out of pre-NGS method covered region  |                                   |
|            | BRCA2:NM_000059:c.793+98G>A                              | rs206073    | 99,29        |            | Out of pre-NGS method covered region  |                                   |
|            | BRCA2:NM_000059:c.3396A>G                                | rs1801406   | 99,68        |            | Could not be detected by CSCE         |                                   |
|            | BRCA2:NM_000059:c.4563A>G                                | rs206075    | 99,77        |            | Could not be detected by CSCE         |                                   |
|            | BRCA2:NM_000059:c.6513G>C                                | rs206076    | 100          |            | Could not be detected by CSCE         |                                   |
|            | BRCA2:NM_000059:c.6841+80T>G                             | .           | 77,78        |            | Out of pre-NGS method covered region  |                                   |
|            | BRCA2:NM_000059:c.6841+191C>A                            | rs11571662  | 100          |            | Out of pre-NGS method covered region  |                                   |
|            | BRCA2:NM_000059:c.6938-120T>C                            | rs206080    | 99,6         |            | Out of pre-NGS method covered region  |                                   |
|            | BRCA2:NM_000059:c.7242A>G                                | rs1799955   | 49,46        |            | Region not analyzed by pre-NGS method |                                   |
|            | BRCA2:NM_000059:c.7397T>C                                | rs169547    | 100          |            | Could not be detected by CSCE         |                                   |
|            | BRCA2:NM_000059:c.7617+190G>A                            | rs206096    | 100          |            | Out of pre-NGS method covered region  |                                   |
|            | BRCA2:NM_000059:c.7806-14T>C                             | rs9534262   | 48,3         |            | Region not analyzed by pre-NGS method |                                   |
|            | BRCA2:NM_000059:c.6841+78_6841+81delAATT                 | rs138193280 | 87,92        |            | Out of pre-NGS method covered region  |                                   |
|            | <b>BRCA2:NM_000059:c.8942_8942delA</b>                   | .           | <b>50,6</b>  | <b>PAT</b> |                                       | NO, variant in homopolymer region |
| <b>T17</b> |                                                          |             |              |            |                                       |                                   |
|            | BRCA2:NM_000059:c.793+98G>A                              | rs206073    | 100          |            | Could not be detected by CSCE         |                                   |
|            | BRCA2:NM_000059:c.1114A>C                                | rs144848    | 100          | Known      |                                       | YES                               |
|            | BRCA2:NM_000059:c.4563A>G                                | rs206075    | 99,66        |            | Could not be detected by CSCE         |                                   |
|            | BRCA2:NM_000059:c.6513G>C                                | rs206076    | 99,74        |            | Could not be detected by CSCE         |                                   |
|            | BRCA2:NM_000059:c.6938-120T>C                            | rs206080    | 99,07        |            | Could not be detected by CSCE         |                                   |
|            | BRCA2:NM_000059:c.7397T>C                                | rs169547    | 100          |            | Could not be detected by CSCE         |                                   |
|            | BRCA2:NM_000059:c.7617+190G>A                            | rs206096    | 100          |            | Could not be detected by CSCE         |                                   |
|            | BRCA2:NM_000059:c.9648+244T>C                            | rs206344    | 100          |            | Could not be detected by CSCE         |                                   |
|            | <b>BRCA2:NM_000059:c.2402_2420delACAATTATGAATCTGATGT</b> | .           | <b>38,89</b> | <b>PAT</b> |                                       | YES                               |
|            | BRCA1:NM_007294:c.5407-193A>G                            | rs8176310   | 44,23        |            | Out of pre-NGS method covered region  |                                   |
|            | BRCA1:NM_007294:c.5333-153A>G                            | rs8176305   | 49,38        |            | Out of pre-NGS method covered region  |                                   |
|            | BRCA1:NM_007294:c.5278-191A>T                            | rs8176297   | 52,89        |            | Out of pre-NGS method covered region  |                                   |
|            | BRCA1:NM_007294:c.5152+66G>A                             | rs3092994   | 44,67        |            | Out of pre-NGS method covered region  |                                   |
|            | BRCA1:NM_007294:c.5075-53C>T                             | rs8176258   | 45,16        | Known      |                                       | YES                               |
|            | BRCA1:NM_007294:c.5075-238A>G                            | rs8176256   | 45,83        |            | Out of pre-NGS method covered region  |                                   |
|            | BRCA1:NM_007294:c.4987-68A>G                             | rs8176234   | 51,65        |            | Out of pre-NGS method covered region  |                                   |
|            | BRCA1:NM_007294:c.4987-92A>G                             | rs8176233   | 47,72        |            | Out of pre-NGS method covered region  |                                   |
|            | BRCA1:NM_007294:c.4986+222A>G                            | rs3092987   | 73,68        |            | Out of pre-NGS method covered region  |                                   |

Supplementary Table S4

|     |                                                   |                   |              |            |                                      |                                   |
|-----|---------------------------------------------------|-------------------|--------------|------------|--------------------------------------|-----------------------------------|
|     | BRCA1:NM_007294:c.4837A>G                         | rs1799966         | 48,05        | Known      |                                      |                                   |
|     | BRCA1:NM_007294:c.4485-63C>G                      | rs8176212         | 46,37        | Known      |                                      | YES                               |
|     | BRCA1:NM_007294:c.4485-137T>A                     | rs2236762         | 45,12        |            | Out of pre-NGS method covered region |                                   |
|     | BRCA1:NM_007294:c.4358-2590T>G                    | rs8176194         | 52,1         |            | Out of pre-NGS method covered region |                                   |
|     | BRCA1:NM_007294:c.4358-2885G>A                    | rs8176193         | 50,44        |            | Out of pre-NGS method covered region |                                   |
|     | BRCA1:NM_007294:c.4308T>C                         | rs1060915         | 43,87        | Known      |                                      | YES                               |
|     | BRCA1:NM_007294:c.4097-141A>C                     | rs799916          | 54,68        |            | Out of pre-NGS method covered region |                                   |
|     | BRCA1:NM_007294:c.3548A>G                         | rs16942           | 46,11        | Known      |                                      | YES                               |
|     | BRCA1:NM_007294:c.3113A>G                         | rs16941           | 47,65        | Known      |                                      | YES                               |
|     | BRCA1:NM_007294:c.2612C>T                         | rs799917          | 52,96        | Known      |                                      | YES                               |
|     | BRCA1:NM_007294:c.2311T>C                         | rs16940           | 49,12        | Known      |                                      | YES                               |
|     | BRCA1:NM_007294:c.2082C>T                         | rs1799949         | 45,98        | Known      |                                      | YES                               |
|     | BRCA1:NM_007294:c.2077G>A                         | rs4986850         | 45,48        | Known      |                                      | YES                               |
|     | BRCA1:NM_007294:c.594-225G>A                      | rs8176147         | 44,74        |            | Out of pre-NGS method covered region |                                   |
|     | BRCA1:NM_007294:c.593+167T>C                      | rs8176145         | 39,47        | Known      |                                      | YES                               |
|     | BRCA1:NM_007294:c.547+146A>T                      | rs8176140         | 53,42        |            | Out of pre-NGS method covered region |                                   |
|     | BRCA1:NM_007294:c.213-161A>G                      | rs799912          | 46,39        |            | Out of pre-NGS method covered region |                                   |
|     | BRCA1:NM_007294:c.1-134T>C                        | rs3765640         | 35,29        | Known      |                                      | YES                               |
|     | BRCA1:NM_007294:c.4485-203_4485-199delAACCC       | rs34250703        | 40,58        |            | Out of pre-NGS method covered region |                                   |
|     | BRCA1:NM_007294:c.548-58_548-58delT               | rs8176144         | 49,24        |            | Out of pre-NGS method covered region |                                   |
|     | BRCA1:NM_007294:c.441+52_441+63delCTTTTTTTTTTT    | .                 | 52,52        |            | Out of pre-NGS method covered region |                                   |
|     | BRCA1:NM_007294:c.441+36_441+38delCTT             | rs147856441       | 44,87        |            | Out of pre-NGS method covered region |                                   |
|     | BRCA1:NM_007294:c.134+224_134+224delT             | rs35149296        | 60           |            | Out of pre-NGS method covered region |                                   |
| T18 |                                                   |                   |              |            |                                      |                                   |
|     | BRCA2:NM_000059:c.1-26G>A                         | rs1799943         | 45,98        | Known      |                                      | YES                               |
|     | BRCA2:NM_000059:c.425+246G>C                      | rs11571613        | 50           |            | Out of pre-NGS method covered region |                                   |
|     | BRCA2:NM_000059:c.631+183T>A                      | rs3752451         | 34,21        |            | Out of pre-NGS method covered region |                                   |
|     | BRCA2:NM_000059:c.793+98G>A                       | rs206073          | 99,41        |            | Out of pre-NGS method covered region |                                   |
|     | BRCA2:NM_000059:c.1114A>C                         | rs144848          | 51,24        | Known      |                                      | YES                               |
|     | BRCA2:NM_000059:c.3396A>G                         | rs1801406         | 45,41        | Known      |                                      | YES                               |
|     | BRCA2:NM_000059:c.4563A>G                         | rs206075          | 100          |            | Could not be detected by CSCE        |                                   |
|     | BRCA2:NM_000059:c.6513G>C                         | rs206076          | 100          |            | Could not be detected by CSCE        |                                   |
|     | BRCA2:NM_000059:c.6841+191C>A                     | rs11571662        | 52,69        |            | Out of pre-NGS method covered region |                                   |
|     | BRCA2:NM_000059:c.6937+239A>T                     | rs190434310       | 61,54        |            | Out of pre-NGS method covered region |                                   |
|     | BRCA2:NM_000059:c.6938-120T>C                     | rs206080          | 98,45        |            | Out of pre-NGS method covered region |                                   |
|     | BRCA2:NM_000059:c.7242A>G                         | rs1799955         | 47,78        | Known      |                                      | YES                               |
|     | BRCA2:NM_000059:c.7397T>C                         | rs169547          | 100          |            | Could not be detected by CSCE        |                                   |
|     | BRCA2:NM_000059:c.7617+190G>A                     | rs206096          | 100          |            | Out of pre-NGS method covered region |                                   |
|     | BRCA2:NM_000059:c.7806-14T>C                      | rs9534262         | 49,88        | Known      |                                      | YES                               |
|     | BRCA2:NM_000059:c.8754+183A>C                     | rs3764791         | 39,13        |            | Out of pre-NGS method covered region |                                   |
|     | BRCA2:NM_000059:c.8754+187C>T                     | rs3764792         | 39,02        |            | Out of pre-NGS method covered region |                                   |
|     | BRCA2:NM_000059:c.8755-66T>C                      | rs4942486         | 45,41        |            | Out of pre-NGS method covered region |                                   |
|     | BRCA2:NM_000059:c.9257-219A>G                     | rs7330025         | 70           |            | Out of pre-NGS method covered region |                                   |
|     | BRCA2:NM_000059:c.9257-16T>C                      | rs11571818        | 45,36        | Known      |                                      | YES                               |
|     | BRCA2:NM_000059:c.9648+244T>C                     | rs206344          | 100          |            | Out of pre-NGS method covered region |                                   |
|     | BRCA2:NM_000059:c.9976A>T                         | rs11571833        | 49,17        | Known      |                                      | YES                               |
|     | <b>BRCA2:NM_000059:c.6275_6276delTT</b>           | <b>rs11571658</b> | <b>43.6</b>  | <b>PAT</b> |                                      | YES                               |
|     | BRCA2:NM_000059:c.6841+78_6841+81delAATT          | rs138193280       | 47,75        |            | Out of pre-NGS method covered region |                                   |
|     | BRCA2:NM_000059:c.8633-150_8633-149insA           | rs200156944       | 44,83        |            | Out of pre-NGS method covered region |                                   |
| T19 |                                                   |                   |              |            |                                      |                                   |
|     | MSH6:NM_000179:c.116G>A                           | rs1042821         | 52,11        | Known      |                                      | NO, variant in low covered region |
|     | MSH6:NM_000179:c.458-133A>G                       | rs3136316         | 50           | Known      |                                      | YES                               |
|     | MSH6:NM_000179:c.458-52G>T                        | rs1800934         | 49,64        | Known      |                                      | YES                               |
|     | MSH6:NM_000179:c.2633T>C                          | rs2020912         | 49,86        | Known      |                                      | YES                               |
|     | <b>MSH6:NM_000179:c.3148_3149insTGATAGAGTGTAT</b> | .                 | <b>33.72</b> | <b>PAT</b> |                                      | YES                               |
|     | MSH6:NM_000179:c.4002-27_4002-27delT              | .                 | 36,45        |            | Out of pre-NGS method covered region |                                   |
| T20 |                                                   |                   |              |            |                                      |                                   |
|     | MSH6:NM_000179:c.186C>A                           | rs1042820         | 56,44        | Known      |                                      | NO, variant in low covered region |

Supplementary Table S4

|     |                                               |             |              |            |                                             |                                   |
|-----|-----------------------------------------------|-------------|--------------|------------|---------------------------------------------|-----------------------------------|
|     | MSH6:NM_000179:c.260+22C>G                    | rs55927047  | 44,44        | Known      |                                             | NO, variant in low covered region |
|     | MSH6:NM_000179:c.276A>G                       | rs1800932   | 49,34        | Known      |                                             | YES                               |
|     | MSH6:NM_000179:c.457+52T>A                    | rs3136282   | 52,34        | Known      |                                             | YES                               |
|     | MSH6:NM_000179:c.458-133A>G                   | rs3136316   | 56,31        | Known      |                                             | YES                               |
|     | MSH6:NM_000179:c.540T>C                       | rs1800935   | 44,8         |            | Region not analyzed by pre-NGS method       |                                   |
|     | MSH6:NM_000179:c.3173-101G>C                  | rs2072447   | 55,2         |            | Out of pre-NGS method covered region        |                                   |
|     | MSH6:NM_000179:c.3438+14A>T                   | rs2020911   | 53,03        |            | Region not analyzed by pre-NGS method       |                                   |
|     | MSH6:NM_000179:c.3556+146G>A                  | rs7562048   | 56,45        | Known      |                                             | YES                               |
|     | MSH6:NM_000179:c.3646+91T>C                   | rs3136359   | 46,43        |            | Out of pre-NGS method covered region        |                                   |
|     | MSH6:NM_000179:c.3802-40C>G                   | rs3136367   | 47,03        |            | Out of pre-NGS method covered region        |                                   |
|     | <b>MSH6:NM_000179:c.3252_3253insC</b>         | .           | <b>41.13</b> | <b>PAT</b> |                                             | NO, variant in homopolymer region |
|     | MSH6:NM_000179:c.3557-18_3557-17insT          | .           | 43.88        |            | Region not analyzed by pre-NGS method       |                                   |
|     | MSH6:NM_000179:c.3646+29_3646+32delCTAT       | rs2234731   | 33.04        | Known      |                                             | YES                               |
|     | MSH6:NM_000179:c.4002-27_4002-27delT          | .           | 35.14        |            | Region not analyzed by pre-NGS method       |                                   |
| T21 |                                               |             |              |            |                                             |                                   |
|     | MLH1:NM_000249:c.453+79A>G                    | rs4234259   | 99,12        |            | Out of pre-NGS method covered region        |                                   |
|     | MLH1:NM_000249:c.655A>G                       | rs1799977   | 99,59        |            | Region not analyzed by pre-NGS method       |                                   |
|     | MLH1:NM_000249:c.791-79A>G                    | rs104894998 | 51,84        |            | Out of pre-NGS method covered region        |                                   |
|     | MLH1:NM_000249:c.1038+86T>C                   | rs2286939   | 100          |            | Out of pre-NGS method covered region        |                                   |
|     | MLH1:NM_000249:c.1039-78A>G                   | rs11129748  | 92,31        |            | Out of pre-NGS method covered region        |                                   |
|     | MLH1:NM_000249:c.1410-169C>T                  | rs2286940   | 100          |            | Out of pre-NGS method covered region        |                                   |
|     | MLH1:NM_000249:c.1668-19A>G                   | rs9876116   | 100          |            | Region not analyzed by pre-NGS method       |                                   |
|     | MLH1:NM_000249:c.1990-121C>T                  | rs2241031   | 100          |            | Out of pre-NGS method covered region        |                                   |
|     | MLH1:NM_000249:c.208-150_208-150delA          | rs111908792 | 21.62        |            | Out of pre-NGS method covered region        |                                   |
|     | MLH1:NM_000249:c.678-212_678-211insGGGA       | rs138898092 | 70           |            | Out of pre-NGS method covered region        |                                   |
|     | MLH1:NM_000249:c.1039-28_1039-26delTTT        | .           | 37.5         |            | Region not analyzed by pre-NGS method       |                                   |
|     | <b>MLH1:NM_000249:c.1588_1589insCGTGGGCTG</b> | .           | <b>39.49</b> | <b>PAT</b> |                                             | YES                               |
|     | MLH1:NM_000249:c.1897-167_1897-167delT        | rs11290150  | 100          |            | Out of pre-NGS method covered region        |                                   |
| T22 |                                               |             |              |            |                                             |                                   |
|     | NF1:NM_000267:c.61-300C>T                     | rs2269856   | 100          |            | Out of pre-NGS method covered region        |                                   |
|     | NF1:NM_000267:c.61-123G>A                     | rs2269855   | 99,36        |            | Out of pre-NGS method covered region        |                                   |
|     | NF1:NM_000267:c.288+41G>A                     | rs2952976   | 100          |            | Could not be detected by RNA-based analysis |                                   |
|     | NF1:NM_000267:c.480-90C>T                     | rs2905807   | 100          |            | Out of pre-NGS method covered region        |                                   |
|     | NF1:NM_000267:c.702G>A                        | rs1801052   | 98,56        | Known      |                                             | YES                               |
|     | NF1:NM_000267:c.888+108C>T                    | rs2953000   | 100          |            | Out of pre-NGS method covered region        |                                   |
|     | NF1:NM_000267:c.888+118G>T                    | rs2952999   | 100          |            | Out of pre-NGS method covered region        |                                   |
|     | NF1:NM_000267:c.1393-130A>T                   | rs2905875   | 100          |            | Out of pre-NGS method covered region        |                                   |
|     | NF1:NM_000267:c.1393-32T>C                    | rs2905876   | 99,83        |            | Could not be detected by RNA-based analysis |                                   |
|     | NF1:NM_000267:c.1641+39T>C                    | rs2905880   | 100          |            | Could not be detected by RNA-based analysis |                                   |
|     | NF1:NM_000267:c.4368-46G>C                    | rs17881285  | 43,74        |            | Could not be detected by RNA-based analysis |                                   |
|     | NF1:NM_000267:c.5205+23T>C                    | rs9894648   | 100          |            | Could not be detected by RNA-based analysis |                                   |
|     | NF1:NM_000267:c.5546+19T>A                    | rs2285894   | 99,19        |            | Could not be detected by RNA-based analysis |                                   |
|     | NF1:NM_000267:c.5546+117G>A                   | rs3815154   | 100          |            | Out of pre-NGS method covered region        |                                   |
|     | NF1:NM_000267:c.6085-29T>A                    | rs7406038   | 88,82        |            | Could not be detected by RNA-based analysis |                                   |
|     | NF1:NM_000267:c.6085-28T>A                    | rs7406039   | 97,6         |            | Could not be detected by RNA-based analysis |                                   |
|     | <b>NF1:NM_000267:c.6226delG</b>               |             | <b>52,4</b>  | <b>PAT</b> |                                             | YES                               |
|     | NF1:NM_000267:c.7126+37C>G                    | rs7405740   | 100          |            | Could not be detected by RNA-based analysis |                                   |
|     | NF1:NM_000267:c.7127-167T>A                   | rs2525569   | 100          |            | Out of pre-NGS method covered region        |                                   |
|     | NF1:NM_000267:c.7395-29G>A                    | rs964288    | 100          |            | Could not be detected by RNA-based analysis |                                   |
|     | NF1:NM_000267:c.7907+166C>T                   | rs7350943   | 100          |            | Out of pre-NGS method covered region        |                                   |
|     | NF1:NM_000267:c.8050+20G>A                    | rs55747230  | 49,26        |            | Could not be detected by RNA-based analysis |                                   |
| T23 |                                               |             |              |            |                                             |                                   |
|     | BRCA2:NM_000059:c.1-26G>A                     | rs1799943   | 45,37        | Known      |                                             | YES                               |
|     | BRCA2:NM_000059:c.425+67A>C                   | rs11571610  | 51,53        | Known      |                                             | YES                               |
|     | BRCA2:NM_000059:c.426-89T>C                   | rs3783265   | 52,3         | Known      |                                             | YES                               |
|     | BRCA2:NM_000059:c.631+183T>A                  | rs3752451   | 100          |            | Out of pre-NGS method covered region        |                                   |
|     | BRCA2:NM_000059:c.793+98G>A                   | rs206073    | 99,29        |            | Out of pre-NGS method covered region        |                                   |
|     | BRCA2:NM_000059:c.865A>C                      | rs766173    | 53,76        | Known      |                                             | YES                               |

Supplementary Table S4

|            |                                             |                   |              |            |                                      |  |     |
|------------|---------------------------------------------|-------------------|--------------|------------|--------------------------------------|--|-----|
|            | BRCA2:NM_000059:c.1365A>G                   | rs1801439         | 43,9         | Known      |                                      |  | YES |
|            | BRCA2:NM_000059:c.1910-51G>T                | rs11571651        | 48,68        |            | Out of pre-NGS method covered region |  |     |
|            | BRCA2:NM_000059:c.2229T>C                   | rs1801499         | 51,14        | Known      |                                      |  | YES |
|            | BRCA2:NM_000059:c.2971A>G                   | rs1799944         | 50,49        | Known      |                                      |  | YES |
|            | BRCA2:NM_000059:c.3396A>G                   | rs1801406         | 50,24        | Known      |                                      |  | YES |
|            | BRCA2:NM_000059:c.4563A>G                   | rs206075          | 99,77        |            | Could not be detected by CSCE        |  |     |
|            | BRCA2:NM_000059:c.6513G>C                   | rs206076          | 100          |            | Could not be detected by CSCE        |  |     |
|            | BRCA2:NM_000059:c.6841+191C>A               | rs11571662        | 45,3         |            | Out of pre-NGS method covered region |  |     |
|            | BRCA2:NM_000059:c.6938-120T>C               | rs206080          | 99,15        |            | Out of pre-NGS method covered region |  |     |
|            | BRCA2:NM_000059:c.7397T>C                   | rs169547          | 100          |            | Could not be detected by CSCE        |  |     |
|            | BRCA2:NM_000059:c.7435+53C>T                | rs11147489        | 48,33        | Known      |                                      |  | YES |
|            | BRCA2:NM_000059:c.7617+190G>A               | rs206096          | 100          |            | Out of pre-NGS method covered region |  |     |
|            | BRCA2:NM_000059:c.7806-14T>C                | rs9534262         | 49,39        | Known      |                                      |  | YES |
|            | BRCA2:NM_000059:c.8755-66T>C                | rs4942486         | 46,5         |            | Out of pre-NGS method covered region |  |     |
|            | BRCA2:NM_000059:c.8953+98T>C                | rs81002901        | 51,75        |            | Out of pre-NGS method covered region |  |     |
|            | BRCA2:NM_000059:c.9257-219A>G               | rs7330025         | 60           |            | Out of pre-NGS method covered region |  |     |
|            | BRCA2:NM_000059:c.6841+78_6841+81delAATT    | rs138193280       | 41,81        |            | Out of pre-NGS method covered region |  |     |
|            | BRCA1:NM_007300:c.5050-142_5050-142delA     | .                 | 24           |            | Out of pre-NGS method covered region |  |     |
|            | <b>BRCA1:NM_007300:c.1953_1956delGAAA</b>   | <b>rs80357526</b> | <b>46,81</b> | <b>PAT</b> |                                      |  | YES |
| VALIDATION |                                             |                   |              |            |                                      |  |     |
| V1         |                                             |                   |              |            |                                      |  |     |
|            | MUTYH:NM_012222:c.1477-40C>G                | rs3219493         | 100          | Known      |                                      |  |     |
|            | MUTYH:NM_012222:c.1477-125C>A               | rs3219492         | 37,74        |            | Out of pre-NGS method covered region |  |     |
|            | <b>MUTYH:NM_012222:c.1187G&gt;A</b>         | <b>rs36053993</b> | <b>51,76</b> | <b>PAT</b> |                                      |  |     |
|            | MUTYH:NM_012222:c.1014G>C                   | rs3219489         | 57,85        | Known      |                                      |  |     |
|            | MUTYH:NM_012222:c.504+35A>G                 | rs3219487         | 100          |            | Out of pre-NGS method covered region |  |     |
|            | <b>MUTYH:NM_012222:c.481G&gt;C</b>          | .                 | <b>51,04</b> | <b>VUS</b> |                                      |  |     |
|            | APC:NM_001127511:c.1-133C>G                 | rs79896135        | 43,64        |            | Out of pre-NGS method covered region |  |     |
|            | APC:NM_001127511:c.1-31T>G                  | rs78429131        | 50           |            | Out of pre-NGS method covered region |  |     |
|            | APC:NM_001127510:c.645+32C>T                | rs2909961         | 55,04        |            | Out of pre-NGS method covered region |  |     |
|            | APC:NM_001127510:c.645+173A>G               | rs2289484         | 50           |            | Out of pre-NGS method covered region |  |     |
|            | APC:NM_001127510:c.934-132G>T               | rs12521276        | 100          |            | Out of pre-NGS method covered region |  |     |
|            | APC:NM_001127510:c.1458T>C                  | rs2229992         | 99,51        | Known      |                                      |  |     |
|            | APC:NM_001127510:c.1635G>A                  | rs351771          | 50,97        | Known      |                                      |  |     |
|            | APC:NM_001127510:c.1743+193G>A              | rs351772          | 91,67        |            | Out of pre-NGS method covered region |  |     |
|            | APC:NM_001127510:c.1744-158A>G              | rs74915204        | 47,06        |            | Out of pre-NGS method covered region |  |     |
|            | APC:NM_001127510:c.4479G>A                  | rs41115           | 48,48        | Known      |                                      |  |     |
|            | APC:NM_001127510:c.5034G>A                  | rs42427           | 57,46        | Known      |                                      |  |     |
|            | APC:NM_001127510:c.5268T>G                  | rs866006          | 43,49        | Known      |                                      |  |     |
|            | APC:NM_001127510:c.5465T>A                  | rs459552          | 99,61        | Known      |                                      |  |     |
|            | APC:NM_001127510:c.5880G>A                  | rs465899          | 49,35        | Known      |                                      |  |     |
|            | APC:NM_001127510:c.7201C>T                  | rs2229994         | 49,49        | Known      |                                      |  |     |
|            | APC:NM_001127510:c.934-132_934-132delG      | rs141013063       | 45,9         |            | Out of pre-NGS method covered region |  |     |
|            | APC:NM_001127510:c.934-120_934-119insG      | rs138003874       | 24,71        |            | Out of pre-NGS method covered region |  |     |
|            | APC:NM_001127510:c.1959-145_1959-144insAGAA | rs3839284         | 100          |            | Out of pre-NGS method covered region |  |     |
| V2         |                                             |                   |              |            |                                      |  |     |
|            | APC:NM_001127510:c.645+173A>G               | rs2289484         | 65,52        | Known      |                                      |  |     |
|            | APC:NM_001127510:c.934-132G>T               | rs12521276        | 28,57        |            | Out of pre-NGS method covered region |  |     |
|            | APC:NM_001127510:c.1458T>C                  | rs2229992         | 46,25        | Known      |                                      |  |     |
|            | <b>APC:NM_001127510:c.1548+1G&gt;C</b>      | .                 | <b>47,74</b> | <b>PAT</b> |                                      |  |     |
|            | APC:NM_001127510:c.1635G>A                  | rs351771          | 52,91        | Known      |                                      |  |     |
|            | APC:NM_001127510:c.1743+193G>A              | rs351772          | Not detected | Known      | Out of I2CHP ROI                     |  |     |
|            | APC:NM_001127510:c.1744-37A>G               | .                 | 51,29        | Known      |                                      |  |     |
|            | APC:NM_001127510:c.4479G>A                  | rs41115           | 51,63        | Known      |                                      |  |     |
|            | APC:NM_001127510:c.5034G>A                  | rs42427           | 49,54        | Known      |                                      |  |     |
|            | APC:NM_001127510:c.5268T>G                  | rs866006          | 49,72        | Known      |                                      |  |     |
|            | APC:NM_001127510:c.5465T>A                  | rs459552          | 49,39        | Known      |                                      |  |     |
|            | APC:NM_001127510:c.5880G>A                  | rs465899          | 55,8         | Known      |                                      |  |     |

Supplementary Table S4

|    |                                             |                   |              |            |                                       |
|----|---------------------------------------------|-------------------|--------------|------------|---------------------------------------|
|    | APC:NM_001127510:c.934-120_934-119insG      | rs138003874       | 28           |            | Out of pre-NGS method covered region  |
|    | APC:NM_001127510:c.1959-145_1959-144insAGAA | rs3839284         | 48.24        |            | Out of pre-NGS method covered region  |
| V3 |                                             |                   |              |            |                                       |
|    | MSH2:NM_000251:c.1-118T>C                   | rs2303425         | 58,99        |            | Out of pre-NGS method covered region  |
|    | MSH2:NM_000251:c.211+9C>G                   | rs2303426         | 98,51        | Known      |                                       |
|    | MSH2:NM_000251:c.211+98T>C                  | rs3815865         | 92,86        |            | Out of pre-NGS method covered region  |
|    | MSH2:NM_000251:c.367-168C>T                 | rs17217758        | 60,38        |            | Out of pre-NGS method covered region  |
|    | <b>MSH2:NM_000251:c.518T&gt;G</b>           | <b>rs63750070</b> | <b>44,49</b> | <b>VUS</b> |                                       |
|    | MSH2:NM_000251:c.646-224A>G                 | rs17217786        | 54,55        |            | Out of pre-NGS method covered region  |
|    | MSH2:NM_000251:c.1077-80G>A                 | rs2347794         | 100          |            | Out of pre-NGS method covered region  |
|    | MSH2:NM_000251:c.1077-10T>C                 | rs17224360        | 54,4         | Known      |                                       |
|    | MSH2:NM_000251:c.1277-212T>A                | rs1981928         | 100          |            | Out of pre-NGS method covered region  |
|    | MSH2:NM_000251:c.1277-118G>A                | rs1981929         | 100          |            | Out of pre-NGS method covered region  |
|    | MSH2:NM_000251:c.1510+111T>C                | rs3771278         | 99,23        |            | Out of pre-NGS method covered region  |
|    | MSH2:NM_000251:c.1510+115A>G                | rs3771279         | 100          |            | Out of pre-NGS method covered region  |
|    | MSH2:NM_000251:c.1510+118T>C                | rs3771280         | 100          |            | Out of pre-NGS method covered region  |
|    | MSH2:NM_000251:c.1511-91G>T                 | rs3732182         | 100          | Known      |                                       |
|    | MSH2:NM_000251:c.1511-9A>T                  | rs12998837        | 57,84        | Known      |                                       |
|    | MSH2:NM_000251:c.1661+12G>A                 | rs3732183         | 100          | Known      |                                       |
|    | MSH2:NM_000251:c.1759+107A>G                | rs3764959         | 100          | Known      |                                       |
|    | MSH2:NM_000251:c.1759+183G>A                | rs3764960         | 98,31        | Known      |                                       |
|    | MSH2:NM_000251:c.2006-127C>T                | rs2059521         | 100          |            | Out of pre-NGS method covered region  |
|    | MSH2:NM_000251:c.2006-6T>C                  | rs2303428         | 48,79        | Known      |                                       |
|    | MSH2:NM_000251:c.2210+175G>A                | rs4583514         | 100          |            | Out of pre-NGS method covered region  |
|    | MSH2:NM_000251:c.2635-214T>C                | rs2042649         | 59,46        |            | Out of pre-NGS method covered region  |
|    | MSH2:NM_000251:c.792+148_792+148delT        | .                 | 27,78        |            | Out of pre-NGS method covered region  |
| V4 |                                             |                   |              |            |                                       |
|    | BRCA2:NM_000059:c.1-26G>A                   | rs1799943         | 43,6         | Known      |                                       |
|    | BRCA2:NM_000059:c.631+183T>A                | rs3752451         | 85,19        |            | Out of pre-NGS method covered region  |
|    | BRCA2:NM_000059:c.793+98G>A                 | rs206073          | 99,05        |            | Out of pre-NGS method covered region  |
|    | BRCA2:NM_000059:c.1114A>C                   | rs144848          | 51,94        | Known      |                                       |
|    | BRCA2:NM_000059:c.2803G>A                   | rs28897716        | 40,53        | Known      |                                       |
|    | BRCA2:NM_000059:c.3396A>G                   | rs1801406         | 49,7         | Known      |                                       |
|    | BRCA2:NM_000059:c.4563A>G                   | rs206075          | 99,73        |            | Region not analyzed by pre-NGS method |
|    | <b>BRCA2:NM_000059:c.5351A&gt;T</b>         | .                 | <b>47,55</b> | <b>VUS</b> | Region not analyzed by pre-NGS method |
|    | BRCA2:NM_000059:c.6513G>C                   | rs206076          | 99,81        |            | Region not analyzed by pre-NGS method |
|    | BRCA2:NM_000059:c.6841+191C>A               | rs11571662        | 51,2         |            | Out of pre-NGS method covered region  |
|    | BRCA2:NM_000059:c.6938-120T>C               | rs206080          | 100          |            | Out of pre-NGS method covered region  |
|    | BRCA2:NM_000059:c.7008-62A>G                | rs76584943        | 49,33        | Known      |                                       |
|    | BRCA2:NM_000059:c.7242A>G                   | rs1799955         | 47,43        | Known      |                                       |
|    | BRCA2:NM_000059:c.7397T>C                   | rs169547          | 99,62        |            | Region not analyzed by pre-NGS method |
|    | BRCA2:NM_000059:c.7617+190G>A               | rs206096          | 100          |            | Out of pre-NGS method covered region  |
|    | BRCA2:NM_000059:c.7806-14T>C                | rs9534262         | 47,76        | Known      |                                       |
|    | BRCA2:NM_000059:c.8754+183A>C               | rs3764791         | 40           |            | Out of pre-NGS method covered region  |
|    | BRCA2:NM_000059:c.8754+187C>T               | rs3764792         | 43,33        |            | Out of pre-NGS method covered region  |
|    | BRCA2:NM_000059:c.8755-66T>C                | rs4942486         | 52,36        |            | Out of pre-NGS method covered region  |
|    | <b>BRCA2:NM_000059:c.5345_5345delA</b>      | .                 | <b>44,09</b> | <b>PAT</b> |                                       |
|    | BRCA2:NM_000059:c.6841+78_6841+81delAATT    | rs138193280       | 36,03        |            | Out of pre-NGS method covered region  |
|    | BRCA1:NM_007294:c.5407-193A>G               | rs8176310         | 55           |            | Out of pre-NGS method covered region  |
|    | BRCA1:NM_007294:c.4485-137T>A               | rs2236762         | 49,44        |            | Out of pre-NGS method covered region  |
|    | BRCA1:NM_007294:c.4097-141A>C               | rs799916          | 50,73        |            | Out of pre-NGS method covered region  |
|    | BRCA1:NM_007294:c.2612C>T                   | rs799917          | 47,32        |            | Out of pre-NGS method covered region  |
|    | BRCA1:NM_007294:c.213-161A>G                | rs799912          | 59,09        |            | Out of pre-NGS method covered region  |
|    | BRCA1:NM_007294:c.441+64_441+64delT         | rs368252296       | 53,33        |            | Out of pre-NGS method covered region  |
| V5 |                                             |                   |              |            |                                       |
|    | MLH1:NM_000249:c.453+79A>G                  | rs4234259         | 100          |            | Out of pre-NGS method covered region  |
|    | MLH1:NM_000249:c.655A>G                     | rs1799977         | 55,38        |            | Region not analyzed by pre-NGS method |
|    | MLH1:NM_000249:c.1038+86T>C                 | rs2286939         | 100          |            | Out of pre-NGS method covered region  |

Supplementary Table S4

|    |                                             |                    |              |            |                                       |
|----|---------------------------------------------|--------------------|--------------|------------|---------------------------------------|
|    | MLH1:NM_000249:c.1410-169C>T                | rs2286940          | 100          |            | Out of pre-NGS method covered region  |
|    | MLH1:NM_000249:c.1668-19A>G                 | rs9876116          | 100          |            | Region not analyzed by pre-NGS method |
|    | MLH1:NM_000249:c.1990-121C>T                | rs2241031          | 97,67        |            | Out of pre-NGS method covered region  |
|    | MLH1:NM_000249:c.1897-167_1897-167delT      | rs11290150         | 100          |            | Out of pre-NGS method covered region  |
|    | <b>MLH1:NM_000249:c.2148_2149insAACA</b>    | .                  | <b>48,71</b> | <b>PAT</b> |                                       |
| V6 |                                             |                    |              |            |                                       |
|    | PMS2:NM_000535:c.2570G>C                    | rs1802683          | 42,07        |            | Region not analyzed by pre-NGS method |
|    | PMS2:NM_000535:c.2446-118G>A                | 0                  | 21,88        |            | Out of pre-NGS method covered region  |
|    | PMS2:NM_000535:c.2276-135T>C                | rs9655490          | 41,42        |            | Out of pre-NGS method covered region  |
|    | PMS2:NM_000535:c.2007-4G>A                  | rs1805326          | 27,91        |            | Region not analyzed by pre-NGS method |
|    | PMS2:NM_000535:c.1621A>G                    | rs2228006          | 99,67        |            | Region not analyzed by pre-NGS method |
|    | PMS2:NM_000535:c.1408C>T                    | rs1805321          | 45,04        |            | Region not analyzed by pre-NGS method |
|    | PMS2:NM_000535:c.1145-57G>A                 | rs199550985        | 20,62        |            | Out of pre-NGS method covered region  |
|    | <b>PMS2:NM_000535:c.943C&gt;T</b>           | <b>rs200640585</b> | <b>36,43</b> | <b>PAT</b> |                                       |
|    | PMS2:NM_000535:c.804-164T>G                 | rs2286681          | 22,41        |            | Region not analyzed by pre-NGS method |
|    | PMS2:NM_000535:c.780C>G                     | rs1805319          | 99,66        |            | Region not analyzed by pre-NGS method |
|    | PMS2:NM_000535:c.705+17A>G                  | rs62456182         | 43,37        |            | Region not analyzed by pre-NGS method |
|    | PMS2:NM_000535:c.251-72A>G                  | rs117831773        | 44,49        |            | Out of pre-NGS method covered region  |
|    | PMS2:NM_000535:c.904-88_904-86delCTG        | rs200573843        | 56           |            | Out of pre-NGS method covered region  |
|    | PMS2:NM_000535:c.705+118_705+118delT        | rs11289444         | 83,33        |            | Out of pre-NGS method covered region  |
| V7 |                                             |                    |              |            |                                       |
|    | APC:NM_001127511:c.1-133C>G                 | rs79896135         | 38,78        |            | Out of pre-NGS method covered region  |
|    | APC:NM_001127511:c.1-31T>G                  | rs78429131         | 32,12        |            | Region not analyzed by pre-NGS method |
|    | APC:NM_001127510:c.645+32C>T                | rs2909961          | 48,44        |            | Region not analyzed by pre-NGS method |
|    | APC:NM_001127510:c.645+173A>G               | rs2289484          | 60,71        | Known      |                                       |
|    | APC:NM_001127510:c.934-132G>T               | rs12521276         | 100          | Known      |                                       |
|    | <b>APC:NM_001127510:c.1312+3A&gt;G</b>      | .                  | <b>53,08</b> | <b>PAT</b> |                                       |
|    | APC:NM_001127510:c.1458T>C                  | rs2229992          | 98,97        | Known      |                                       |
|    | APC:NM_001127510:c.1635G>A                  | rs351771           | 49,49        | Known      |                                       |
|    | APC:NM_001127510:c.1743+193G>A              | rs351772           | Not detected | Known      | Out of I2CHP ROI                      |
|    | APC:NM_001127510:c.1744-158A>G              | rs74915204         | 50           |            | Out of pre-NGS method covered region  |
|    | APC:NM_001127510:c.4479G>A                  | rs41115            | 48,71        |            | Region not analyzed by pre-NGS method |
|    | APC:NM_001127510:c.5034G>A                  | rs42427            | 53,38        |            | Region not analyzed by pre-NGS method |
|    | APC:NM_001127510:c.5268T>G                  | rs866006           | 48,41        |            | Region not analyzed by pre-NGS method |
|    | APC:NM_001127510:c.5465T>A                  | rs459552           | 100          |            | Region not analyzed by pre-NGS method |
|    | APC:NM_001127510:c.5880G>A                  | rs465899           | 53,66        |            | Region not analyzed by pre-NGS method |
|    | APC:NM_001127510:c.7201C>T                  | rs2229994          | 48,04        |            | Region not analyzed by pre-NGS method |
|    | APC:NM_001127510:c.934-132_934-132delG      | rs141013063        | 68,42        |            | Out of pre-NGS method covered region  |
|    | APC:NM_001127510:c.934-120_934-119insG      | rs138003874        | 28,57        |            | Out of pre-NGS method covered region  |
|    | APC:NM_001127510:c.1959-145_1959-144insAGAA | rs3839284          | 97,87        |            | Out of pre-NGS method covered region  |
| V8 |                                             |                    |              |            |                                       |
|    | BRCA2:NM_000059:c.793+98G>A                 | rs206073           | 99,18        |            | Out of pre-NGS method covered region  |
|    | BRCA2:NM_000059:c.1114A>C                   | rs144848           | 99,85        | Known      |                                       |
|    | BRCA2:NM_000059:c.4563A>G                   | rs206075           | 99,75        | Known      |                                       |
|    | BRCA2:NM_000059:c.5199C>T                   | rs28897734         | 48,22        | Known      |                                       |
|    | BRCA2:NM_000059:c.6513G>C                   | rs206076           | 100          | Known      |                                       |
|    | BRCA2:NM_000059:c.6841+191C>A               | rs11571662         | 34,78        |            | Out of pre-NGS method covered region  |
|    | BRCA2:NM_000059:c.6938-120T>C               | rs206080           | 98,48        |            | Out of pre-NGS method covered region  |
|    | BRCA2:NM_000059:c.7242A>G                   | rs1799955          | 50           | Known      |                                       |
|    | BRCA2:NM_000059:c.7397T>C                   | rs169547           | 100          | Known      |                                       |
|    | BRCA2:NM_000059:c.7617+190G>A               | rs206096           | 100          |            | Out of pre-NGS method covered region  |
|    | BRCA2:NM_000059:c.7806-14T>C                | rs9534262          | 54,05        | Known      |                                       |
|    | BRCA2:NM_000059:c.8754+183A>C               | rs3764791          | 50           |            | Out of pre-NGS method covered region  |
|    | BRCA2:NM_000059:c.8754+187C>T               | rs3764792          | 45,16        |            | Out of pre-NGS method covered region  |
|    | BRCA2:NM_000059:c.8755-66T>C                | rs4942486          | 43,66        |            | Out of pre-NGS method covered region  |
|    | BRCA2:NM_000059:c.6841+78_6841+81delAATT    | rs138193280        | 38,77        |            | Out of pre-NGS method covered region  |
|    | TP53:NM_001126112:c.1101-221G>A             | rs6503048          | 39,58        |            | Out of pre-NGS method covered region  |
|    | <b>TP53:NM_001126112:c.743G&gt;A</b>        | <b>rs11540652</b>  | <b>43,57</b> | <b>PAT</b> |                                       |

Supplementary Table S4

|     |                                                    |             |              |                  |                                      |
|-----|----------------------------------------------------|-------------|--------------|------------------|--------------------------------------|
|     | TP53:NM_001126112:c.672+62A>G                      | rs1625895   | 46,98        |                  | Out of pre-NGS method covered region |
|     | TP53:NM_001126112:c.376-91G>A                      | rs2909430   | 57,98        |                  | Out of pre-NGS method covered region |
|     | TP53:NM_001126112:c.376-101A>T                     | rs145153611 | 54,63        |                  | Out of pre-NGS method covered region |
|     | TP53:NM_001126112:c.97-52G>A                       | .           | 56,65        |                  | Out of pre-NGS method covered region |
|     | TP53:NM_001126112:c.672+194_672+194delC            | .           | 58,82        |                  | Out of pre-NGS method covered region |
|     | TP53:NM_001126112:c.96+41_97-54delACCTGGAGGGCTGGGG | rs146534833 | 44,64        |                  | Out of pre-NGS method covered region |
| V9  |                                                    |             |              |                  |                                      |
|     | MSH6:NM_000179:c.276A>G                            | rs1800932   | 48,68        | Known            |                                      |
|     | MSH6:NM_000179:c.457+52T>A                         | rs3136282   | 52,54        |                  | Out of pre-NGS method covered region |
|     | MSH6:NM_000179:c.458-133A>G                        | rs3136316   | 97,56        |                  | Out of pre-NGS method covered region |
|     | MSH6:NM_000179:c.540T>C                            | rs1800935   | 46,62        | Known            |                                      |
|     | MSH6:NM_000179:c.3173-101G>C                       | rs2072447   | 72,5         |                  | Out of pre-NGS method covered region |
|     | MSH6:NM_000179:c.3438+14A>T                        | rs2020911   | 61,97        |                  | Out of pre-NGS method covered region |
|     | MSH6:NM_000179:c.3556+146G>A                       | rs7562048   | 35,29        |                  | Out of pre-NGS method covered region |
|     | MSH6:NM_000179:c.3646+91T>C                        | rs3136359   | 56,25        |                  | Out of pre-NGS method covered region |
|     | MSH6:NM_000179:c.3802-40C>G                        | rs3136367   | 44,67        | Known            |                                      |
|     | <b>MSH6:NM_000179:c.1614_1616delTCT</b>            | .           | <b>58,33</b> | <b>US / PPAT</b> |                                      |
|     | MSH6:NM_000179:c.3646+29_3646+32delCTAT            | rs2234731   | 42,86        |                  | Out of pre-NGS method covered region |
|     | MSH6:NM_000179:c.4002-27_4002-27delT               | .           | 32,58        |                  | Out of pre-NGS method covered region |
| V10 |                                                    |             |              |                  |                                      |
|     | BRCA2:NM_000059:c.793+98G>A                        | rs206073    | 99,7         |                  | Out of pre-NGS method covered region |
|     | BRCA2:NM_000059:c.1114A>C                          | rs144848    | 47,61        | Known            |                                      |
|     | BRCA2:NM_000059:c.3807T>C                          | rs543304    | 47,72        | Known            |                                      |
|     | BRCA2:NM_000059:c.4563A>G                          | rs206075    | 100          |                  | Could not be detected by CSCE        |
|     | BRCA2:NM_000059:c.6513G>C                          | rs206076    | 99,6         |                  | Could not be detected by CSCE        |
|     | BRCA2:NM_000059:c.6938-120T>C                      | rs206080    | 99,17        |                  | Out of pre-NGS method covered region |
|     | BRCA2:NM_000059:c.7397T>C                          | rs169547    | 99,77        |                  | Could not be detected by CSCE        |
|     | BRCA2:NM_000059:c.7617+190G>A                      | rs206096    | 100          |                  | Out of pre-NGS method covered region |
|     | BRCA2:NM_000059:c.9501+178A>G                      | rs206343    | 66,67        |                  | Out of pre-NGS method covered region |
|     | BRCA2:NM_000059:c.9648+244T>C                      | rs206344    | 100          |                  | Out of pre-NGS method covered region |
|     | BRCA2:NM_000059:c.10257+105A>C                     | rs15869     | 41,79        |                  | Out of pre-NGS method covered region |
|     | BRCA1:NM_007294:c.5407-193A>G                      | rs8176310   | 50           |                  | Out of pre-NGS method covered region |
|     | BRCA1:NM_007294:c.5278-191A>T                      | rs8176297   | 45,65        |                  | Out of pre-NGS method covered region |
|     | BRCA1:NM_007294:c.5152+66G>A                       | rs3092994   | 58,7         |                  | Out of pre-NGS method covered region |
|     | BRCA1:NM_007294:c.5075-237C>A                      | rs8176257   | 72,73        |                  | Out of pre-NGS method covered region |
|     | BRCA1:NM_007294:c.5074+65G>A                       | rs8176235   | 55,49        | Known            |                                      |
|     | BRCA1:NM_007294:c.4987-68A>G                       | rs8176234   | 54,55        |                  | Out of pre-NGS method covered region |
|     | BRCA1:NM_007294:c.4987-92A>G                       | rs8176233   | 48,15        |                  | Out of pre-NGS method covered region |
|     | BRCA1:NM_007294:c.4986+222A>G                      | rs3092987   | 81,82        |                  | Out of pre-NGS method covered region |
|     | BRCA1:NM_007294:c.4837A>G                          | rs1799966   | 48,29        | Known            |                                      |
|     | BRCA1:NM_007294:c.4485-63C>G                       | rs8176212   | 49,67        |                  | Out of pre-NGS method covered region |
|     | BRCA1:NM_007294:c.4485-137T>A                      | rs2236762   | 46,9         |                  | Out of pre-NGS method covered region |
|     | BRCA1:NM_007294:c.4358-2590T>G                     | rs8176194   | 51,53        |                  | Out of pre-NGS method covered region |
|     | BRCA1:NM_007294:c.4358-2885G>A                     | rs8176193   | 48,27        |                  | Out of pre-NGS method covered region |
|     | BRCA1:NM_007294:c.4308T>C                          | rs1060915   | 52,13        | Known            |                                      |
|     | BRCA1:NM_007294:c.4097-141A>C                      | rs799916    | 51,88        |                  | Out of pre-NGS method covered region |
|     | BRCA1:NM_007294:c.3548A>G                          | rs16942     | 49,79        | Known            |                                      |
|     | BRCA1:NM_007294:c.3113A>G                          | rs16941     | 50,39        | Known            |                                      |
|     | BRCA1:NM_007294:c.2612C>T                          | rs799917    | 49,51        | Known            |                                      |
|     | BRCA1:NM_007294:c.2311T>C                          | rs16940     | 47,28        | Known            |                                      |
|     | BRCA1:NM_007294:c.2082C>T                          | rs1799949   | 52,33        | Known            |                                      |
|     | BRCA1:NM_007294:c.594-225G>A                       | rs8176147   | 43,75        |                  | Out of pre-NGS method covered region |
|     | BRCA1:NM_007294:c.593+167T>C                       | rs8176145   | 50,94        | Known            |                                      |
|     | BRCA1:NM_007294:c.547+146A>T                       | rs8176140   | 63,64        |                  | Out of pre-NGS method covered region |
|     | BRCA1:NM_007294:c.213-161A>G                       | rs799912    | 52,94        |                  | Out of pre-NGS method covered region |
|     | BRCA1:NM_007294:c.1-134T>C                         | rs3765640   | 54,55        |                  | Out of pre-NGS method covered region |
|     | BRCA1:NM_007294:c.5468-121_5468-121delA            | rs375078966 | 21,49        |                  | Out of pre-NGS method covered region |
|     | BRCA1:NM_007294:c.4485-203_4485-199delAACCC        | rs34250703  | 40,74        |                  | Out of pre-NGS method covered region |

Supplementary Table S4

|     |                                                   |                    |                     |              |                                                    |               |
|-----|---------------------------------------------------|--------------------|---------------------|--------------|----------------------------------------------------|---------------|
|     | BRCA1:NM_007294:c.548-58_548-58delT               | rs8176144          | 51.58               |              | Out of pre-NGS method covered region               |               |
|     | BRCA1:NM_007294:c.441+52_441+63delCTTTTTTTTTTT    | .                  | 53.66               |              | Out of pre-NGS method covered region               |               |
|     | BRCA1:NM_007294:c.441+36_441+38delCTT             | rs147856441        | 39.26               |              | Out of pre-NGS method covered region               |               |
|     | <b>BRCA1:NM_007294:c.68_69delAG</b>               | <b>rs386833395</b> | <b>49.82</b>        | <b>PAT</b>   |                                                    |               |
| V11 |                                                   |                    |                     |              |                                                    |               |
|     | BRCA2:NM_000059:c.1-26G>A                         | rs1799943          | 47.96               | Known        |                                                    |               |
|     | BRCA2:NM_000059:c.425+246G>C                      | rs11571613         | 55                  |              | Out of pre-NGS method covered region               |               |
|     | BRCA2:NM_000059:c.631+183T>A                      | rs3752451          | 44.44               |              | Out of pre-NGS method covered region               |               |
|     | BRCA2:NM_000059:c.793+98G>A                       | rs206073           | 99.16               |              | Out of pre-NGS method covered region               |               |
|     | BRCA2:NM_000059:c.1114A>C                         | rs144848           | 45.68               | Known        |                                                    |               |
|     | BRCA2:NM_000059:c.3396A>G                         | rs1801406          | 51.67               | Known        |                                                    |               |
|     | BRCA2:NM_000059:c.4563A>G                         | rs206075           | 100                 | Known        |                                                    |               |
|     | BRCA2:NM_000059:c.6513G>C                         | rs206076           | 99.83               | Known        |                                                    |               |
|     | BRCA2:NM_000059:c.6841+191C>A                     | rs11571662         | 50                  |              | Out of pre-NGS method covered region               |               |
|     | BRCA2:NM_000059:c.6938-120T>C                     | rs206080           | 99.71               |              | Out of pre-NGS method covered region               |               |
|     | BRCA2:NM_000059:c.7242A>G                         | rs1799955          | 49.01               | Known        |                                                    |               |
|     | BRCA2:NM_000059:c.7397T>C                         | rs169547           | 99.24               | Known        |                                                    |               |
|     | BRCA2:NM_000059:c.7617+190G>A                     | rs206096           | 97.22               |              | Out of pre-NGS method covered region               |               |
|     | BRCA2:NM_000059:c.7806-14T>C                      | rs9534262          | 99.63               | Known        |                                                    |               |
|     | BRCA2:NM_000059:c.8754+183A>C                     | rs3764791          | 49.06               |              | Out of pre-NGS method covered region               |               |
|     | BRCA2:NM_000059:c.8754+187C>T                     | rs3764792          | 51.02               |              | Out of pre-NGS method covered region               |               |
|     | BRCA2:NM_000059:c.8755-66T>C                      | rs4942486          | 99.28               |              | Out of pre-NGS method covered region               |               |
|     | BRCA2:NM_000059:c.9257-219A>G                     | rs7330025          | 100                 |              | Out of pre-NGS method covered region               |               |
|     | BRCA2:NM_000059:c.9648+244T>C                     | rs206344           | 100                 |              | Out of pre-NGS method covered region               |               |
|     | BRCA2:NM_000059:c.6841+78_6841+81delAATT          | rs138193280        | 43.32               |              | Out of pre-NGS method covered region               |               |
|     | BRCA2:NM_000059:c.8633-150_8633-149insA           | rs200156944        | 32.26               |              | Out of pre-NGS method covered region               |               |
|     | BRCA1:NM_007294:c.3119G>A                         | rs4986852          | 47.96               | Known        |                                                    |               |
|     | BRCA1:NM_007294:c.548-293G>A                      | rs117281398        | 57.14               |              | Out of pre-NGS method covered region               |               |
|     | BRCA1:NM_007294:c.442-34C>T                       | rs799923           | 53.02               | Known        |                                                    |               |
|     | BRCA1:NM_007294:c.4987-142_4987-142delA           | .                  | 22.22               |              | Out of pre-NGS method covered region               |               |
| V12 |                                                   |                    |                     |              |                                                    |               |
|     | BRCA2:NM_000059:c.793+98G>A                       | rs206073           | 97.27               |              | Out of pre-NGS method covered region               |               |
|     | BRCA2:NM_000059:c.3807T>C                         | rs543304           | 99.35               |              | Region not analyzed by pre-NGS method              |               |
|     | BRCA2:NM_000059:c.4563A>G                         | rs206075           | 100                 |              | Region not analyzed by pre-NGS method              |               |
|     | BRCA2:NM_000059:c.6513G>C                         | rs206076           | 100                 |              | Region not analyzed by pre-NGS method              |               |
|     | BRCA2:NM_000059:c.6938-120T>C                     | rs206080           | 100                 |              | Out of pre-NGS method covered region               |               |
|     | BRCA2:NM_000059:c.7397T>C                         | rs169547           | 99                  |              | Region not analyzed by pre-NGS method              |               |
|     | BRCA2:NM_000059:c.7617+190G>A                     | rs206096           | 100                 |              | Out of pre-NGS method covered region               |               |
|     | BRCA2:NM_000059:c.10257+105A>C                    | rs15869            | 100                 |              | Out of pre-NGS method covered region               |               |
|     | <b>BRCA2:NM_000059:c.1307_1308delAG</b>           | .                  | <b>40.95</b>        | <b>PAT</b>   |                                                    |               |
| V13 |                                                   |                    |                     |              |                                                    |               |
|     | <b>PMS2:NM_000535:c.2606G&gt;C (c.*17G&gt;C)</b>  | .                  | <b>Not detected</b> | <b>Known</b> | <b>Complex region</b>                              | <b>SANGER</b> |
|     | <b>PMS2:NM_000535:c.2681_2682insA (c.*92dupA)</b> | <b>rs3214300</b>   | <b>Not detected</b> | <b>Known</b> | <b>Complex region</b>                              | <b>SANGER</b> |
|     | PMS2:NM_000535:c.2570G>C                          | rs1802683          | 36.5                |              |                                                    |               |
|     | PMS2:NM_000535:c.2466T>C                          | rs10000            | 41.48               | Known        |                                                    |               |
|     | PMS2:NM_000535:c.2446-118G>A                      | .                  | 33.33               |              | Region not analyzed by pre-NGS method              |               |
|     | <b>PMS2:NM_000535:c.2340C&gt;T</b>                | <b>rs17420802</b>  | <b>Not detected</b> | <b>Known</b> | <b>Complex region</b>                              | <b>SANGER</b> |
|     | <b>PMS2:NM_000535:c.2334A&gt;G</b>                | <b>rs63750220</b>  | <b>Not detected</b> | <b>Known</b> | <b>Complex region</b>                              | <b>SANGER</b> |
|     | PMS2:NM_000535:c.2276-135T>C                      | rs9655490          | 62.5                |              | Region not analyzed by pre-NGS method              |               |
|     | <b>PMS2:NM_000535:c.2253T&gt;C</b>                | <b>rs1805325</b>   | <b>Not detected</b> | <b>Known</b> | <b>Variant only detected by RNA-based analysis</b> | <b>SANGER</b> |
|     | PMS2:NM_000535:c.2174+103C>T                      | rs2692553          | 29.09               |              | Region not analyzed by pre-NGS method              |               |
|     | PMS2:NM_000535:c.2007-7C>T                        | rs55954143         | 40.17               | Known        |                                                    |               |
|     | PMS2:NM_000535:c.1621A>G                          | rs2228006          | 100                 | Known        |                                                    |               |
|     | PMS2:NM_000535:c.1145-57G>A                       | rs199550985        | 20.42               |              | Region not analyzed by pre-NGS method              |               |
|     | PMS2:NM_000535:c.780C>G                           | rs1805319          | 99.26               | Known        |                                                    |               |
|     | PMS2:NM_000535:c.353+209G>A                       | rs6463526          | 61.9                |              | Region not analyzed by pre-NGS method              |               |
|     | PMS2:NM_000535:c.251-72A>G                        | rs117831773        | 48.33               |              | Region not analyzed by pre-NGS method              |               |
|     | <b>PMS2:NM_000535:c.59G&gt;A</b>                  | <b>rs10254120</b>  | <b>52.23</b>        | <b>PAT</b>   |                                                    |               |



Supplementary Table S4

|     |                                                          |                   |              |            |                                       |  |
|-----|----------------------------------------------------------|-------------------|--------------|------------|---------------------------------------|--|
|     | PMS2:NM_000535:c.23+72C>T                                | rs3735295         | 34,21        | Known      |                                       |  |
|     | PMS2:NM_000535:c.705+118_705+118delT                     | rs11289444        | 53.7         |            | Region not analyzed by pre-NGS method |  |
| V14 |                                                          |                   |              |            |                                       |  |
|     | BRCA2:NM_000059:c.793+98G>A                              | rs206073          | 98,49        |            | Out of pre-NGS method covered region  |  |
|     | BRCA2:NM_000059:c.1114A>C                                | rs144848          | 99,69        |            | Region not analyzed by pre-NGS method |  |
|     | BRCA2:NM_000059:c.4563A>G                                | rs206075          | 100          |            | Region not analyzed by pre-NGS method |  |
|     | BRCA2:NM_000059:c.6513G>C                                | rs206076          | 99,43        |            | Region not analyzed by pre-NGS method |  |
|     | BRCA2:NM_000059:c.6938-120T>C                            | rs206080          | 97,83        |            | Out of pre-NGS method covered region  |  |
|     | BRCA2:NM_000059:c.7397T>C                                | rs169547          | 99,52        |            | Region not analyzed by pre-NGS method |  |
|     | BRCA2:NM_000059:c.7617+190G>A                            | rs206096          | 100          |            | Out of pre-NGS method covered region  |  |
|     | BRCA2:NM_000059:c.7806-14T>C                             | rs9534262         | 47,44        |            | Region not analyzed by pre-NGS method |  |
|     | BRCA2:NM_000059:c.8755-66T>C                             | rs4942486         | 49,81        |            | Out of pre-NGS method covered region  |  |
|     | <b>BRCA2:NM_000059:c.3934_3952delAATTACAAGAGAAATACTG</b> | .                 | <b>35.53</b> | <b>PAT</b> |                                       |  |
| V15 |                                                          |                   |              |            |                                       |  |
|     | APC:NM_001127510:c.423-256G>A                            | rs392179          | 100          |            | Out of pre-NGS method covered region  |  |
|     | APC:NM_001127510:c.645+173A>G                            | rs2289484         | 100          | Known      |                                       |  |
|     | APC:NM_001127510:c.730-22G>C                             | rs115634618       | 47,09        | Known      |                                       |  |
|     | APC:NM_001127510:c.934-132G>T                            | rs12521276        | 100          |            | Out of pre-NGS method covered region  |  |
|     | APC:NM_001127510:c.1458T>C                               | rs2229992         | 100          | Known      |                                       |  |
|     | APC:NM_001127510:c.1635G>A                               | rs351771          | 99,73        | Known      |                                       |  |
|     | APC:NM_001127510:c.1743+193G>A                           | rs351772          | 100          | Known      |                                       |  |
|     | <b>APC:NM_001127510:c.2344A&gt;T</b>                     | .                 | <b>50,63</b> | <b>PAT</b> |                                       |  |
|     | APC:NM_001127510:c.4479G>A                               | rs41115           | 99,4         | Known      |                                       |  |
|     | APC:NM_001127510:c.5034G>A                               | rs42427           | 99,47        | Known      |                                       |  |
|     | APC:NM_001127510:c.5268T>G                               | rs866006          | 100          | Known      |                                       |  |
|     | APC:NM_001127510:c.5465T>A                               | rs459552          | 99,42        | Known      |                                       |  |
|     | APC:NM_001127510:c.5880G>A                               | rs465899          | 100          | Known      |                                       |  |
|     | APC:NM_001127510:c.934-133_934-132delTG                  | rs369189394       | 20           |            | Out of pre-NGS method covered region  |  |
|     | APC:NM_001127510:c.934-132_934-132delG                   | rs141013063       | 65,31        |            | Out of pre-NGS method covered region  |  |
|     | APC:NM_001127510:c.934-120_934-119insG                   | rs138003874       | 77,42        |            | Out of pre-NGS method covered region  |  |
|     | APC:NM_001127510:c.1959-145_1959-144insAGAA              | rs3839284         | 93,58        |            | Out of pre-NGS method covered region  |  |
| V16 |                                                          |                   |              |            |                                       |  |
|     | MUTYH:NM_012222:c.1477-40C>G                             | rs3219493         | 99,54        |            | Region not analyzed by pre-NGS method |  |
|     | <b>MUTYH:NM_012222:c.1187G&gt;A</b>                      | <b>rs36053993</b> | <b>100</b>   | <b>PAT</b> |                                       |  |
|     | MUTYH:NM_012222:c.504+35A>G                              | rs3219487         | 100          |            | Region not analyzed by pre-NGS method |  |
| V17 |                                                          |                   |              |            |                                       |  |
|     | BRCA2:NM_000059:c.793+98G>A                              | rs206073          | 99,35        |            | Out of pre-NGS method covered region  |  |
|     | BRCA2:NM_000059:c.1114A>C                                | rs144848          | 48,33        | Known      |                                       |  |
|     | BRCA2:NM_000059:c.3807T>C                                | rs543304          | 47,13        | Known      |                                       |  |
|     | BRCA2:NM_000059:c.4563A>G                                | rs206075          | 100          |            | Could not be detected by CSCE         |  |
|     | BRCA2:NM_000059:c.6513G>C                                | rs206076          | 100          |            | Could not be detected by CSCE         |  |
|     | BRCA2:NM_000059:c.6938-120T>C                            | rs206080          | 99,12        |            | Out of pre-NGS method covered region  |  |
|     | BRCA2:NM_000059:c.7397T>C                                | rs169547          | 99,5         |            | Could not be detected by CSCE         |  |
|     | BRCA2:NM_000059:c.7617+190G>A                            | rs206096          | 100          |            | Out of pre-NGS method covered region  |  |
|     | BRCA2:NM_000059:c.9501+178A>G                            | rs206343          | 34,62        |            | Out of pre-NGS method covered region  |  |
|     | BRCA2:NM_000059:c.10257+105A>C                           | rs15869           | 63,75        |            | Out of pre-NGS method covered region  |  |
|     | <b>BRCA2:NM_000059:c.5718_5719delCT</b>                  | <b>rs80359530</b> | <b>49.73</b> | <b>PAT</b> |                                       |  |
|     | BRCA1:NM_007294:c.4987-142_4987-142delA                  | .                 | 23.68        |            | Out of pre-NGS method covered region  |  |
| V18 |                                                          |                   |              |            |                                       |  |
|     | BRCA2:NM_000059:c.1-26G>A                                | rs1799943         | 49,85        | Known      |                                       |  |
|     | BRCA2:NM_000059:c.631+183T>A                             | rs3752451         | 47,06        |            | Out of pre-NGS method covered region  |  |
|     | BRCA2:NM_000059:c.793+98G>A                              | rs206073          | 99,27        |            | Out of pre-NGS method covered region  |  |
|     | BRCA2:NM_000059:c.1114A>C                                | rs144848          | 47,34        | Known      |                                       |  |
|     | BRCA2:NM_000059:c.3396A>G                                | rs1801406         | 43,85        | Known      |                                       |  |
|     | BRCA2:NM_000059:c.4563A>G                                | rs206075          | 100          | Known      |                                       |  |
|     | BRCA2:NM_000059:c.6513G>C                                | rs206076          | 99,81        | Known      |                                       |  |
|     | BRCA2:NM_000059:c.6841+191C>A                            | rs11571662        | 54,65        |            | Out of pre-NGS method covered region  |  |
|     | BRCA2:NM_000059:c.6938-120T>C                            | rs206080          | 100          |            | Out of pre-NGS method covered region  |  |

Supplementary Table S4

|     |                                          |                   |              |            |                                       |  |
|-----|------------------------------------------|-------------------|--------------|------------|---------------------------------------|--|
|     | BRCA2:NM_000059:c.7242A>G                | rs1799955         | 48,96        | Known      |                                       |  |
|     | BRCA2:NM_000059:c.7397T>C                | rs169547          | 99,61        | Known      |                                       |  |
|     | BRCA2:NM_000059:c.7617+190G>A            | rs206096          | 100          |            | Out of pre-NGS method covered region  |  |
|     | BRCA2:NM_000059:c.7806-14T>C             | rs9534262         | 48,26        | Known      |                                       |  |
|     | BRCA2:NM_000059:c.8754+183A>C            | rs3764791         | 38,64        |            | Out of pre-NGS method covered region  |  |
|     | BRCA2:NM_000059:c.8754+187C>T            | rs3764792         | 37,84        |            | Out of pre-NGS method covered region  |  |
|     | BRCA2:NM_000059:c.8755-66T>C             | rs4942486         | 47,33        |            | Out of pre-NGS method covered region  |  |
|     | BRCA2:NM_000059:c.9501+178A>G            | rs206343          | 48,28        |            | Out of pre-NGS method covered region  |  |
|     | BRCA2:NM_000059:c.10257+105A>C           | rs15869           | 64,29        |            | Out of pre-NGS method covered region  |  |
|     | BRCA2:NM_000059:c.6841+78_6841+81delAATT | rs138193280       | 45,78        |            | Out of pre-NGS method covered region  |  |
|     | BRCA1:NM_007294:c.2584A>G                | rs80356927        | 47,47        | Known      |                                       |  |
|     | BRCA1:NM_007294:c.442-34C>T              | rs799923          | 50,78        | Known      |                                       |  |
|     | BRCA1:NM_007294:c.4987-142_4987-142delA  | .                 | 26,58        |            | Out of pre-NGS method covered region  |  |
|     | <b>BRCA1:NM_007294:c.3869_3870delAA</b>  | <b>rs80357918</b> | <b>51,32</b> | <b>PAT</b> |                                       |  |
| V19 |                                          |                   |              |            |                                       |  |
|     | MSH2:NM_000251:c.211+9C>G                | rs2303426         | 48,72        |            | Region not analyzed by pre-NGS method |  |
|     | MSH2:NM_000251:c.367-86A>C               | rs17217765        | 46,15        |            | Out of pre-NGS method covered region  |  |
|     | <b>MSH2:NM_000251:c.691G&gt;T</b>        | .                 | <b>46,99</b> | <b>PAT</b> | Region not analyzed by pre-NGS method |  |
|     | MSH2:NM_000251:c.1277-118G>A             | rs1981929         | 46,95        |            | Out of pre-NGS method covered region  |  |
|     | MSH2:NM_000251:c.1661+90T>C              | rs10183143        | 68,57        |            | Out of pre-NGS method covered region  |  |
|     | MSH2:NM_000251:c.2006-127C>T             | rs2059521         | 100          |            | Out of pre-NGS method covered region  |  |
|     | <b>MSH2:NM_000251:c.689_689delC</b>      | .                 | <b>45,2</b>  | <b>PAT</b> |                                       |  |
|     | MSH2:NM_000251:c.2005+43_2005+43delT     | rs201305711       | 22,78        |            | Region not analyzed by pre-NGS method |  |
|     | MLH1:NM_000249:c.453+79A>G               | rs4234259         | 51,39        |            | Out of pre-NGS method covered region  |  |
|     | MLH1:NM_000249:c.655A>G                  | rs1799977         | 55,83        | Known      |                                       |  |
|     | MLH1:NM_000249:c.1038+86T>C              | rs2286939         | 65,62        |            | Out of pre-NGS method covered region  |  |
|     | MLH1:NM_000249:c.1039-78A>G              | rs11129748        | 60           |            | Out of pre-NGS method covered region  |  |
|     | MLH1:NM_000249:c.1668-19A>G              | rs9876116         | 42,14        |            | Region not analyzed by pre-NGS method |  |
|     | MLH1:NM_000249:c.1990-121C>T             | rs2241031         | 55,36        |            | Out of pre-NGS method covered region  |  |
|     | MLH1:NM_000249:c.1897-167_1897-167delT   | rs11290150        | 85,81        |            | Out of pre-NGS method covered region  |  |
| V20 |                                          |                   |              |            |                                       |  |
|     | PMS2:NM_000535:c.2446-118G>A             | .                 | 27,59        |            | Out of pre-NGS method covered region  |  |
|     | PMS2:NM_000535:c.2276-135T>C             | rs9655490         | 39,23        |            | Out of pre-NGS method covered region  |  |
|     | PMS2:NM_000535:c.1621A>G                 | rs2228006         | 99,79        | Known      |                                       |  |
|     | PMS2:NM_000535:c.1408C>T                 | rs1805321         | 56,54        | Known      |                                       |  |
|     | PMS2:NM_000535:c.804-164T>G              | rs2286681         | 61,54        |            | Out of pre-NGS method covered region  |  |
|     | PMS2:NM_000535:c.780C>G                  | rs1805319         | 99,11        | Known      |                                       |  |
|     | PMS2:NM_000535:c.705+17A>G               | rs62456182        | 50           | Known      |                                       |  |
|     | PMS2:NM_000535:c.538-223A>G              | rs2345060         | 75           |            | Out of pre-NGS method covered region  |  |
|     | PMS2:NM_000535:c.163+138A>G              | rs62456183        | 70           |            | Out of pre-NGS method covered region  |  |
|     | PMS2:NM_000535:c.989-105_989-104insA     | rs149249785       | 36           |            | Out of pre-NGS method covered region  |  |
|     | <b>PMS2:NM_000535:c.780_780delC</b>      | .                 | <b>49,53</b> | <b>PAT</b> |                                       |  |
|     | PMS2:NM_000535:c.705+118_705+118delT     | rs11289444        | 48,84        |            | Out of pre-NGS method covered region  |  |
| V21 |                                          |                   |              |            |                                       |  |
|     | MLH1:NM_000249:c.1-93G>A                 | rs1800734         | 100          | Known      |                                       |  |
|     | MLH1:NM_000249:c.116+199C>T              | .                 | 40,91        |            | Out of pre-NGS method covered region  |  |
|     | MLH1:NM_000249:c.1039-31A>T              | rs59684491        | 43,75        |            | Region not analyzed by pre-NGS method |  |
|     | MLH1:NM_000249:c.1039-29A>T              | rs6771325         | 73,68        |            | Region not analyzed by pre-NGS method |  |
|     | MLH1:NM_000249:c.1039-31_1039-29delATA   | .                 | 26,92        |            | Region not analyzed by pre-NGS method |  |
| V22 |                                          |                   |              |            |                                       |  |
|     | BRCA2:NM_000059:c.793+98G>A              | rs206073          | 99,61        |            | Out of pre-NGS method covered region  |  |
|     | BRCA2:NM_000059:c.1114A>C                | rs144848          | 99,42        | Known      |                                       |  |
|     | BRCA2:NM_000059:c.4563A>G                | rs206075          | 100          | Known      |                                       |  |
|     | BRCA2:NM_000059:c.6513G>C                | rs206076          | 99,66        | Known      |                                       |  |
|     | BRCA2:NM_000059:c.6938-120T>C            | rs206080          | 98,37        |            | Out of pre-NGS method covered region  |  |
|     | BRCA2:NM_000059:c.7397T>C                | rs169547          | 100          | Known      |                                       |  |
|     | BRCA2:NM_000059:c.7617+190G>A            | rs206096          | 100          |            | Out of pre-NGS method covered region  |  |
|     | BRCA2:NM_000059:c.9648+84G>A             | rs81002832        | 40,86        |            | Out of pre-NGS method covered region  |  |

Supplementary Table S4

|     |                                               |                   |              |            |                                       |  |  |
|-----|-----------------------------------------------|-------------------|--------------|------------|---------------------------------------|--|--|
|     | BRCA1:NM_007294:c.5407-193A>G                 | rs8176310         | 38,71        |            | Out of pre-NGS method covered region  |  |  |
|     | BRCA1:NM_007294:c.5278-191A>T                 | rs8176297         | 59,57        |            | Out of pre-NGS method covered region  |  |  |
|     | BRCA1:NM_007294:c.5152+66G>A                  | rs3092994         | 42,2         |            | Out of pre-NGS method covered region  |  |  |
|     | BRCA1:NM_007294:c.5075-237C>A                 | rs8176257         | 53,85        |            | Out of pre-NGS method covered region  |  |  |
|     | BRCA1:NM_007294:c.5074+65G>A                  | rs8176235         | 50,44        |            | Out of pre-NGS method covered region  |  |  |
|     | BRCA1:NM_007294:c.4987-68A>G                  | rs8176234         | 52,94        |            | Out of pre-NGS method covered region  |  |  |
|     | BRCA1:NM_007294:c.4987-92A>G                  | rs8176233         | 50           |            | Out of pre-NGS method covered region  |  |  |
|     | BRCA1:NM_007294:c.4986+222A>G                 | rs3092987         | 77,78        |            | Out of pre-NGS method covered region  |  |  |
|     | BRCA1:NM_007294:c.4837A>G                     | rs1799966         | 51,23        | Known      |                                       |  |  |
|     | BRCA1:NM_007294:c.4485-63C>G                  | rs8176212         | 50,72        |            | Out of pre-NGS method covered region  |  |  |
|     | BRCA1:NM_007294:c.4485-137T>A                 | rs2236762         | 53,25        |            | Out of pre-NGS method covered region  |  |  |
|     | BRCA1:NM_007294:c.4358-2590T>G                | rs8176194         | 47,86        |            | Out of pre-NGS method covered region  |  |  |
|     | BRCA1:NM_007294:c.4358-2885G>A                | rs8176193         | 48,88        |            | Out of pre-NGS method covered region  |  |  |
|     | BRCA1:NM_007294:c.4357+117G>A                 | rs3737559         | 41,79        |            | Out of pre-NGS method covered region  |  |  |
|     | BRCA1:NM_007294:c.4308T>C                     | rs1060915         | 46,19        | Known      |                                       |  |  |
|     | BRCA1:NM_007294:c.4097-141A>C                 | rs799916          | 45,81        |            | Out of pre-NGS method covered region  |  |  |
|     | BRCA1:NM_007294:c.3548A>G                     | rs16942           | 47,99        | Known      |                                       |  |  |
|     | BRCA1:NM_007294:c.3113A>G                     | rs16941           | 47,08        | Known      |                                       |  |  |
|     | BRCA1:NM_007294:c.2612C>T                     | rs799917          | 47,71        | Known      |                                       |  |  |
|     | BRCA1:NM_007294:c.2311T>C                     | rs16940           | 49,37        | Known      |                                       |  |  |
|     | BRCA1:NM_007294:c.2082C>T                     | rs1799949         | 47,7         | Known      |                                       |  |  |
|     | BRCA1:NM_007294:c.594-225G>A                  | rs8176147         | 69,23        |            | Out of pre-NGS method covered region  |  |  |
|     | BRCA1:NM_007294:c.593+167T>C                  | rs8176145         | 46,81        |            | Out of pre-NGS method covered region  |  |  |
|     | BRCA1:NM_007294:c.547+146A>T                  | rs8176140         | 56,52        |            | Out of pre-NGS method covered region  |  |  |
|     | BRCA1:NM_007294:c.213-161A>G                  | rs799912          | 43,24        |            | Out of pre-NGS method covered region  |  |  |
|     | BRCA1:NM_007294:c.1-134T>C                    | rs3765640         | 60           |            | Out of pre-NGS method covered region  |  |  |
|     | BRCA1:NM_007294:c.4485-203_4485-199delAACCC   | rs34250703        | 53,85        |            | Out of pre-NGS method covered region  |  |  |
|     | <b>BRCA1:NM_007294:c.3770_3771delAG</b>       | <b>rs80357993</b> | <b>50,44</b> | <b>PAT</b> |                                       |  |  |
|     | BRCA1:NM_007294:c.548-58_548-58delIT          | rs8176144         | 46,24        |            | Out of pre-NGS method covered region  |  |  |
|     | BRCA1:NM_007294:c.441+52_441+63delCTTTTTTTTTT | .                 | 37,04        |            | Out of pre-NGS method covered region  |  |  |
|     | BRCA1:NM_007294:c.441+36_441+38delCTT         | rs147856441       | 46,15        |            | Out of pre-NGS method covered region  |  |  |
|     | BRCA1:NM_007294:c.134+224_134+224delIT        | rs35149296        | 46,15        |            | Out of pre-NGS method covered region  |  |  |
| V23 |                                               |                   |              |            |                                       |  |  |
|     | BRCA2:NM_000059:c.793+98G>A                   | rs206073          | 100          |            | Out of pre-NGS method covered region  |  |  |
|     | BRCA2:NM_000059:c.1114A>C                     | rs144848          | 54,95        |            | Region not analyzed by pre-NGS method |  |  |
|     | BRCA2:NM_000059:c.3807T>C                     | rs543304          | 42,21        |            | Region not analyzed by pre-NGS method |  |  |
|     | BRCA2:NM_000059:c.4563A>G                     | rs206075          | 100          |            | Region not analyzed by pre-NGS method |  |  |
|     | BRCA2:NM_000059:c.6513G>C                     | rs206076          | 100          |            | Region not analyzed by pre-NGS method |  |  |
|     | BRCA2:NM_000059:c.6938-120T>C                 | rs206080          | 100          |            | Out of pre-NGS method covered region  |  |  |
|     | BRCA2:NM_000059:c.7397T>C                     | rs169547          | 99,43        |            | Region not analyzed by pre-NGS method |  |  |
|     | BRCA2:NM_000059:c.7617+190G>A                 | rs206096          | 100          |            | Out of pre-NGS method covered region  |  |  |
|     | BRCA2:NM_000059:c.7806-14T>C                  | rs9534262         | 49,52        |            | Region not analyzed by pre-NGS method |  |  |
|     | BRCA2:NM_000059:c.8755-66T>C                  | rs4942486         | 50           |            | Out of pre-NGS method covered region  |  |  |
|     | BRCA2:NM_000059:c.10257+105A>C                | rs15869           | 59,09        |            | Out of pre-NGS method covered region  |  |  |
|     | <b>BRCA2:NM_000059:c.1126_1126delIT</b>       | .                 | <b>43,55</b> | <b>PAT</b> |                                       |  |  |
| V24 |                                               |                   |              |            |                                       |  |  |
|     | APC:NM_001127510:c.423-256G>A                 | rs392179          | 100          |            | Out of pre-NGS method covered region  |  |  |
|     | APC:NM_001127510:c.645+173A>G                 | rs2289484         | 100          |            | Out of pre-NGS method covered region  |  |  |
|     | APC:NM_001127510:c.933+261G>T                 | rs12656359        | 100          |            | Out of pre-NGS method covered region  |  |  |
|     | APC:NM_001127510:c.934-132G>T                 | rs12521276        | 100          |            | Out of pre-NGS method covered region  |  |  |
|     | APC:NM_001127510:c.1458T>C                    | rs2229992         | 100          |            | Region not analyzed by pre-NGS method |  |  |
|     | APC:NM_001127510:c.1635G>A                    | rs351771          | 99,68        |            | Region not analyzed by pre-NGS method |  |  |
|     | APC:NM_001127510:c.1743+193G>A                | rs351772          | 100          |            | Out of pre-NGS method covered region  |  |  |
|     | APC:NM_001127510:c.3249T>G                    | rs201629780       | 45,35        |            | Region not analyzed by pre-NGS method |  |  |
|     | APC:NM_001127510:c.4479G>A                    | rs41115           | 100          |            | Region not analyzed by pre-NGS method |  |  |
|     | APC:NM_001127510:c.5034G>A                    | rs42427           | 100          |            | Region not analyzed by pre-NGS method |  |  |
|     | APC:NM_001127510:c.5268T>G                    | rs866006          | 99,65        |            | Region not analyzed by pre-NGS method |  |  |
|     | APC:NM_001127510:c.5465T>A                    | rs459552          | 100          |            | Region not analyzed by pre-NGS method |  |  |

Supplementary Table S4

|     |                                               |                   |              |            |                                       |  |  |
|-----|-----------------------------------------------|-------------------|--------------|------------|---------------------------------------|--|--|
|     | APC:NM_001127510:c.5880G>A                    | rs465899          | 100          |            | Region not analyzed by pre-NGS method |  |  |
|     | APC:NM_001127510:c.934-133_934-132delTG       | rs369189394       | 28.05        |            | Out of pre-NGS method covered region  |  |  |
|     | APC:NM_001127510:c.934-132_934-132delG        | rs141013063       | 67.8         |            | Out of pre-NGS method covered region  |  |  |
|     | APC:NM_001127510:c.934-120_934-119insG        | rs138003874       | 89.52        |            | Out of pre-NGS method covered region  |  |  |
|     | APC:NM_001127510:c.1959-145_1959-144insAGAA   | rs3839284         | 97.56        |            | Out of pre-NGS method covered region  |  |  |
|     | <b>APC:NM_001127510:c.3180_3184delAAAAC</b>   | .                 | <b>53.1</b>  | <b>PAT</b> |                                       |  |  |
| V25 |                                               |                   |              |            |                                       |  |  |
|     | MSH2:NM_000251:c.1661+90T>C                   | rs10183143        | 37.93        |            | Out of pre-NGS method covered region  |  |  |
|     | MSH2:NM_000251:c.2006-127C>T                  | rs2059521         | 100          |            | Out of pre-NGS method covered region  |  |  |
|     | <b>MSH2:NM_000251:c.388_389delCA</b>          | <b>rs63750704</b> | <b>45.72</b> | <b>PAT</b> |                                       |  |  |
|     | MSH2:NM_000251:c.2005+43_2005+43delT          | rs201305711       | 21.5         |            | Out of pre-NGS method covered region  |  |  |
| V26 |                                               |                   |              |            |                                       |  |  |
|     | BRCA2:NM_000059:c.793+98G>A                   | rs206073          | 100          |            | Out of pre-NGS method covered region  |  |  |
|     | BRCA2:NM_000059:c.1114A>C                     | rs144848          | 50.84        |            | Region not analyzed by pre-NGS method |  |  |
|     | BRCA2:NM_000059:c.3807T>C                     | rs543304          | 47.4         |            | Region not analyzed by pre-NGS method |  |  |
|     | BRCA2:NM_000059:c.4563A>G                     | rs206075          | 100          |            | Region not analyzed by pre-NGS method |  |  |
|     | BRCA2:NM_000059:c.6513G>C                     | rs206076          | 100          |            | Region not analyzed by pre-NGS method |  |  |
|     | BRCA2:NM_000059:c.6938-120T>C                 | rs206080          | 99.6         |            | Out of pre-NGS method covered region  |  |  |
|     | BRCA2:NM_000059:c.7397T>C                     | rs169547          | 100          |            | Region not analyzed by pre-NGS method |  |  |
|     | BRCA2:NM_000059:c.7617+190G>A                 | rs206096          | 100          |            | Out of pre-NGS method covered region  |  |  |
|     | BRCA2:NM_000059:c.7806-14T>C                  | rs9534262         | 49.51        |            | Region not analyzed by pre-NGS method |  |  |
|     | BRCA2:NM_000059:c.8755-66T>C                  | rs4942486         | 51.45        |            | Out of pre-NGS method covered region  |  |  |
|     | BRCA2:NM_000059:c.9257-235G>A                 | rs7327867         | 63.64        |            | Out of pre-NGS method covered region  |  |  |
|     | BRCA2:NM_000059:c.9257-219A>G                 | rs7330025         | 50           |            | Out of pre-NGS method covered region  |  |  |
|     | BRCA2:NM_000059:c.9501+178A>G                 | rs206343          | 50           |            | Out of pre-NGS method covered region  |  |  |
|     | BRCA2:NM_000059:c.9648+244T>C                 | rs206344          | 100          |            | Out of pre-NGS method covered region  |  |  |
|     | BRCA2:NM_000059:c.10257+105A>C                | rs15869           | 47.93        |            | Out of pre-NGS method covered region  |  |  |
|     | <b>BRCA2:NM_000059:c.7227_7227delT</b>        | .                 | <b>42.31</b> | <b>PAT</b> |                                       |  |  |
|     | BRCA1:NM_007294:c.5407-193A>G                 | rs8176310         | 75.93        |            | Out of pre-NGS method covered region  |  |  |
|     | BRCA1:NM_007294:c.5333-153A>G                 | rs8176305         | 45.71        |            | Out of pre-NGS method covered region  |  |  |
|     | BRCA1:NM_007294:c.5278-191A>T                 | rs8176297         | 53.27        |            | Out of pre-NGS method covered region  |  |  |
|     | BRCA1:NM_007294:c.5152+66G>A                  | rs3092994         | 48.16        |            | Out of pre-NGS method covered region  |  |  |
|     | BRCA1:NM_007294:c.5075-238A>G                 | rs8176256         | 66.67        |            | Out of pre-NGS method covered region  |  |  |
|     | BRCA1:NM_007294:c.4987-68A>G                  | rs8176234         | 46.86        |            | Out of pre-NGS method covered region  |  |  |
|     | BRCA1:NM_007294:c.4987-92A>G                  | rs8176233         | 46.34        |            | Out of pre-NGS method covered region  |  |  |
|     | BRCA1:NM_007294:c.4986+222A>G                 | rs3092987         | 54.17        |            | Out of pre-NGS method covered region  |  |  |
|     | BRCA1:NM_007294:c.4837A>G                     | rs1799966         | 47.99        |            | Region not analyzed by pre-NGS method |  |  |
|     | BRCA1:NM_007294:c.4485-63C>G                  | rs8176212         | 51.8         |            | Out of pre-NGS method covered region  |  |  |
|     | BRCA1:NM_007294:c.4485-137T>A                 | rs2236762         | 51.2         |            | Out of pre-NGS method covered region  |  |  |
|     | BRCA1:NM_007294:c.4358-2590T>G                | rs8176194         | 50.92        |            | Out of pre-NGS method covered region  |  |  |
|     | BRCA1:NM_007294:c.4358-2885G>A                | rs8176193         | 50           |            | Out of pre-NGS method covered region  |  |  |
|     | BRCA1:NM_007294:c.4308T>C                     | rs1060915         | 48.09        |            | Region not analyzed by pre-NGS method |  |  |
|     | BRCA1:NM_007294:c.4097-141A>C                 | rs799916          | 42.68        |            | Out of pre-NGS method covered region  |  |  |
|     | BRCA1:NM_007294:c.3548A>G                     | rs16942           | 50.19        |            | Region not analyzed by pre-NGS method |  |  |
|     | BRCA1:NM_007294:c.3113A>G                     | rs16941           | 47.86        |            | Region not analyzed by pre-NGS method |  |  |
|     | BRCA1:NM_007294:c.2612C>T                     | rs799917          | 45.07        |            | Region not analyzed by pre-NGS method |  |  |
|     | BRCA1:NM_007294:c.2311T>C                     | rs16940           | 48.22        |            | Region not analyzed by pre-NGS method |  |  |
|     | BRCA1:NM_007294:c.2082C>T                     | rs1799949         | 52.39        |            | Region not analyzed by pre-NGS method |  |  |
|     | BRCA1:NM_007294:c.2077G>A                     | rs4986850         | 52.9         |            | Region not analyzed by pre-NGS method |  |  |
|     | BRCA1:NM_007294:c.594-225G>A                  | rs8176147         | 62.07        |            | Out of pre-NGS method covered region  |  |  |
|     | BRCA1:NM_007294:c.593+167T>C                  | rs8176145         | 48.18        |            | Out of pre-NGS method covered region  |  |  |
|     | BRCA1:NM_007294:c.547+146A>T                  | rs8176140         | 66.67        |            | Out of pre-NGS method covered region  |  |  |
|     | BRCA1:NM_007294:c.442-34C>T                   | rs799923          | 43.84        |            | Region not analyzed by pre-NGS method |  |  |
|     | BRCA1:NM_007294:c.213-161A>G                  | rs799912          | 37.08        |            | Out of pre-NGS method covered region  |  |  |
|     | BRCA1:NM_007294:c.1-134T>C                    | rs3765640         | 57.78        |            | Out of pre-NGS method covered region  |  |  |
|     | BRCA1:NM_007294:c.4485-203_4485-199delAACCC   | rs34250703        | 27.27        |            | Out of pre-NGS method covered region  |  |  |
|     | BRCA1:NM_007294:c.548-58_548-58delT           | rs8176144         | 45.99        |            | Out of pre-NGS method covered region  |  |  |
|     | BRCA1:NM_007294:c.441+52_441+63delCTTTTTTTTTT | .                 | 44.23        |            | Out of pre-NGS method covered region  |  |  |

Supplementary Table S4

|     |                                          |             |             |              |                                       |                    |        |
|-----|------------------------------------------|-------------|-------------|--------------|---------------------------------------|--------------------|--------|
|     | BRCA1:NM_007294:c.441+36_441+38delCTT    | rs147856441 | 44.89       |              | Region not analyzed by pre-NGS method |                    |        |
|     | BRCA1:NM_007294:c.134+224_134+224delT    | rs35149296  | 59.09       |              | Out of pre-NGS method covered region  |                    |        |
| V27 |                                          |             |             |              |                                       |                    |        |
|     | MSH6:NM_000179:c.186C>A                  | rs1042820   | 58,18       | Known        |                                       |                    |        |
|     | MSH6:NM_000179:c.260-22C>G               |             |             | Not detected | Known                                 | Low covered region | SANGER |
|     | MSH6:NM_000179:c.276A>G                  | rs1800932   | 51,93       | Known        |                                       |                    |        |
|     | MSH6:NM_000179:c.457+52T>A               | rs3136282   | 55,36       | Known        |                                       |                    |        |
|     | MSH6:NM_000179:c.458-133A>G              | rs3136316   | 58,65       | Known        |                                       |                    |        |
|     | MSH6:NM_000179:c.540T>C                  | rs1800935   | 51,34       | Known        |                                       |                    |        |
|     | MSH6:NM_000179:c.628-56C>T               | rs1800936   | 45,11       | Known        |                                       |                    |        |
|     | MSH6:NM_000179:c.3173-101G>C             | rs2072447   | 49,04       |              | Out of pre-NGS method covered region  |                    |        |
|     | MSH6:NM_000179:c.3438+14A>T              | rs2020911   | 49,63       | Known        |                                       |                    |        |
|     | MSH6:NM_000179:c.3556+146G>A             | rs7562048   | 42,55       | Known        |                                       |                    |        |
|     | MSH6:NM_000179:c.3557-144G>A             | rs7562367   | 66,67       |              | Out of pre-NGS method covered region  |                    |        |
|     | MSH6:NM_000179:c.3646+91T>C              | rs3136359   | 48,98       |              | Out of pre-NGS method covered region  |                    |        |
|     | MSH6:NM_000179:c.3802-40C>G              | rs3136367   | 49,02       | Known        |                                       |                    |        |
|     | <b>MSH6:NM_000179:c.2905_2906delTA</b>   | .           | <b>49.4</b> | <b>PAT</b>   |                                       |                    |        |
|     | MSH6:NM_000179:c.3646+29_3646+32delCTAT  | rs2234731   | 41.11       | Known        |                                       |                    |        |
|     | MSH6:NM_000179:c.4002-27_4002-27delT     | .           | 33.27       |              |                                       |                    |        |
| V28 |                                          |             |             |              |                                       |                    |        |
|     | BRCA2:NM_000059:c.425+246G>C             | rs11571613  | 57,89       |              | Out of pre-NGS method covered region  |                    |        |
|     | BRCA2:NM_000059:c.631+183T>A             | rs3752451   | 63,64       |              | Out of pre-NGS method covered region  |                    |        |
|     | BRCA2:NM_000059:c.793+98G>A              | rs206073    | 99,55       |              | Out of pre-NGS method covered region  |                    |        |
|     | BRCA2:NM_000059:c.3396A>G                | rs1801406   | 46,92       | Known        |                                       |                    |        |
|     | BRCA2:NM_000059:c.3807T>C                | rs543304    | 49,13       | Known        |                                       |                    |        |
|     | BRCA2:NM_000059:c.4563A>G                | rs206075    | 100         |              | Could not be detected by CSCE         |                    |        |
|     | BRCA2:NM_000059:c.6513G>C                | rs206076    | 100         |              | Could not be detected by CSCE         |                    |        |
|     | BRCA2:NM_000059:c.6841+191C>A            | rs11571662  | 51,47       |              | Out of pre-NGS method covered region  |                    |        |
|     | BRCA2:NM_000059:c.6938-120T>C            | rs206080    | 100         |              | Out of pre-NGS method covered region  |                    |        |
|     | BRCA2:NM_000059:c.7242A>G                | rs1799955   | 48,74       | Known        |                                       |                    |        |
|     | BRCA2:NM_000059:c.7397T>C                | rs169547    | 100         |              | Could not be detected by CSCE         |                    |        |
|     | BRCA2:NM_000059:c.7617+190G>A            | rs206096    | 100         |              | Out of pre-NGS method covered region  |                    |        |
|     | BRCA2:NM_000059:c.7806-14T>C             | rs9534262   | 52,33       | Known        |                                       |                    |        |
|     | BRCA2:NM_000059:c.8754+183A>C            | rs3764791   | 36,36       |              | Out of pre-NGS method covered region  |                    |        |
|     | BRCA2:NM_000059:c.8754+187C>T            | rs3764792   | 36,67       |              | Out of pre-NGS method covered region  |                    |        |
|     | BRCA2:NM_000059:c.8755-66T>C             | rs4942486   | 47,32       |              | Out of pre-NGS method covered region  |                    |        |
|     | BRCA2:NM_000059:c.9257-219A>G            | rs7330025   | 45          |              | Out of pre-NGS method covered region  |                    |        |
|     | BRCA2:NM_000059:c.9501+178A>G            | rs206343    | 61,9        |              | Out of pre-NGS method covered region  |                    |        |
|     | BRCA2:NM_000059:c.9648+244T>C            | rs206344    | 100         |              | Out of pre-NGS method covered region  |                    |        |
|     | BRCA2:NM_000059:c.10257+105A>C           | rs15869     | 55,81       |              | Out of pre-NGS method covered region  |                    |        |
|     | <b>BRCA2:NM_000059:c.260_261delCT</b>    | .           | <b>44.9</b> | <b>PAT</b>   |                                       |                    |        |
|     | BRCA2:NM_000059:c.6841+78_6841+81delAATT | rs138193280 | 46,06       |              | Out of pre-NGS method covered region  |                    |        |
|     | BRCA2:NM_000059:c.8633-150_8633-149insA  | rs200156944 | 36,11       |              | Out of pre-NGS method covered region  |                    |        |
|     | BRCA1:NM_007294:c.5407-193A>G            | rs8176310   | 49,38       |              | Out of pre-NGS method covered region  |                    |        |
|     | BRCA1:NM_007294:c.5333-153A>G            | rs8176305   | 54,98       |              | Out of pre-NGS method covered region  |                    |        |
|     | BRCA1:NM_007294:c.5278-191A>T            | rs8176297   | 48,85       |              | Out of pre-NGS method covered region  |                    |        |
|     | BRCA1:NM_007294:c.5152+66G>A             | rs3092994   | 52,53       |              | Out of pre-NGS method covered region  |                    |        |
|     | BRCA1:NM_007294:c.5075-238A>G            | rs8176256   | 51,43       |              | Out of pre-NGS method covered region  |                    |        |
|     | BRCA1:NM_007294:c.4987-68A>G             | rs8176234   | 43,29       |              | Out of pre-NGS method covered region  |                    |        |
|     | BRCA1:NM_007294:c.4987-92A>G             | rs8176233   | 42,49       |              | Out of pre-NGS method covered region  |                    |        |
|     | BRCA1:NM_007294:c.4986+222A>G            | rs3092987   | 60          |              | Out of pre-NGS method covered region  |                    |        |
|     | BRCA1:NM_007294:c.4837A>G                | rs1799966   | 55,39       | Known        |                                       |                    |        |
|     | BRCA1:NM_007294:c.4485-63C>G             | rs8176212   | 46,72       |              | Out of pre-NGS method covered region  |                    |        |
|     | BRCA1:NM_007294:c.4485-137T>A            | rs2236762   | 50          |              | Out of pre-NGS method covered region  |                    |        |
|     | BRCA1:NM_007294:c.4358-2590T>G           | rs8176194   | 50          |              | Out of pre-NGS method covered region  |                    |        |
|     | BRCA1:NM_007294:c.4358-2885G>A           | rs8176193   | 49,27       |              | Out of pre-NGS method covered region  |                    |        |
|     | BRCA1:NM_007294:c.4308T>C                | rs1060915   | 45,37       | Known        |                                       |                    |        |
|     | BRCA1:NM_007294:c.4097-141A>C            | rs799916    | 53,38       |              | Out of pre-NGS method covered region  |                    |        |

Supplementary Table S4

|     |                                               |             |              |            |                                      |  |
|-----|-----------------------------------------------|-------------|--------------|------------|--------------------------------------|--|
|     | BRCA1:NM_007294:c.3548A>G                     | rs16942     | 44,53        | Known      |                                      |  |
|     | BRCA1:NM_007294:c.3113A>G                     | rs16941     | 51,03        | Known      |                                      |  |
|     | BRCA1:NM_007294:c.2612C>T                     | rs799917    | 47,68        | Known      |                                      |  |
|     | BRCA1:NM_007294:c.2311T>C                     | rs16940     | 50,74        | Known      |                                      |  |
|     | BRCA1:NM_007294:c.2082C>T                     | rs1799949   | 50,65        | Known      |                                      |  |
|     | BRCA1:NM_007294:c.2077G>A                     | rs4986850   | 50,59        | Known      |                                      |  |
|     | BRCA1:NM_007294:c.671-178G>A                  | rs8176151   | 48,84        |            | Out of pre-NGS method covered region |  |
|     | BRCA1:NM_007294:c.670+259T>G                  | rs7503154   | 50           |            | Out of pre-NGS method covered region |  |
|     | BRCA1:NM_007294:c.594-225G>A                  | rs8176147   | 56,25        |            | Out of pre-NGS method covered region |  |
|     | BRCA1:NM_007294:c.593+167T>C                  | rs8176145   | 53,01        | Known      |                                      |  |
|     | BRCA1:NM_007294:c.547+146A>T                  | rs8176140   | 51,06        |            | Out of pre-NGS method covered region |  |
|     | BRCA1:NM_007294:c.213-161A>G                  | rs799912    | 41,76        |            | Out of pre-NGS method covered region |  |
|     | BRCA1:NM_007294:c.1-134T>C                    | rs3765640   | 44,12        | Known      |                                      |  |
|     | BRCA1:NM_007294:c.4485-203_4485-199delAACCC   | rs34250703  | 32,65        |            | Out of pre-NGS method covered region |  |
|     | BRCA1:NM_007294:c.548-58_548-58delT           | rs8176144   | 44,24        |            | Out of pre-NGS method covered region |  |
|     | BRCA1:NM_007294:c.441+52_441+63delCTTTTTTTTTT | 0           | 48,33        |            | Out of pre-NGS method covered region |  |
|     | BRCA1:NM_007294:c.441+36_441+38delCTT         | rs147856441 | 42,96        |            | Out of pre-NGS method covered region |  |
|     | BRCA1:NM_007294:c.134+224_134+224delT         | rs35149296  | 46,15        |            | Out of pre-NGS method covered region |  |
| V29 |                                               |             |              |            |                                      |  |
|     | BRCA2:NM_000059:c.1-26G>A                     | rs1799943   | 100          |            | Could not be detected by CSCE        |  |
|     | BRCA2:NM_000059:c.67+82C>G                    | rs189026060 | 50,34        |            | Out of pre-NGS method covered region |  |
|     | BRCA2:NM_000059:c.631+183T>A                  | rs3752451   | 100          |            | Out of pre-NGS method covered region |  |
|     | BRCA2:NM_000059:c.793+98G>A                   | rs206073    | 100          |            | Out of pre-NGS method covered region |  |
|     | BRCA2:NM_000059:c.3396A>G                     | rs1801406   | 100          |            | Could not be detected by CSCE        |  |
|     | BRCA2:NM_000059:c.4563A>G                     | rs206075    | 100          |            | Could not be detected by CSCE        |  |
|     | BRCA2:NM_000059:c.6513G>C                     | rs206076    | 99,17        |            | Could not be detected by CSCE        |  |
|     | BRCA2:NM_000059:c.6841+191C>A                 | rs11571662  | 100          |            | Out of pre-NGS method covered region |  |
|     | BRCA2:NM_000059:c.6938-120T>C                 | rs206080    | 100          |            | Out of pre-NGS method covered region |  |
|     | BRCA2:NM_000059:c.7242A>G                     | rs1799955   | 100          |            | Could not be detected by CSCE        |  |
|     | BRCA2:NM_000059:c.7397T>C                     | rs169547    | 100          |            | Could not be detected by CSCE        |  |
|     | BRCA2:NM_000059:c.7617+190G>A                 | rs206096    | 100          |            | Out of pre-NGS method covered region |  |
|     | BRCA2:NM_000059:c.7806-14T>C                  | rs9534262   | 100          |            | Could not be detected by CSCE        |  |
|     | BRCA2:NM_000059:c.8754+183A>C                 | rs3764791   | 100          |            | Out of pre-NGS method covered region |  |
|     | BRCA2:NM_000059:c.8754+187C>T                 | rs3764792   | 100          |            | Out of pre-NGS method covered region |  |
|     | BRCA2:NM_000059:c.8755-66T>C                  | rs4942486   | 96,3         |            | Out of pre-NGS method covered region |  |
|     | BRCA2:NM_000059:c.9257-235G>A                 | rs7327867   | 100          |            | Out of pre-NGS method covered region |  |
|     | BRCA2:NM_000059:c.9257-219A>G                 | rs7330025   | 100          |            | Out of pre-NGS method covered region |  |
|     | BRCA2:NM_000059:c.6841+78_6841+81delAATT      | rs138193280 | 87,25        |            | Out of pre-NGS method covered region |  |
|     | BRCA2:NM_000059:c.8633-150_8633-149insA       | rs200156944 | 84,62        |            | Out of pre-NGS method covered region |  |
|     | BRCA1:NM_007294:c.5468-121_5468-121delA       | rs375078966 | 24,62        |            | Out of pre-NGS method covered region |  |
|     | <b>BRCA1:NM_007294:c.4110_4111insATCT</b>     | .           | <b>47,21</b> | <b>PAT</b> |                                      |  |
| V30 |                                               |             |              |            |                                      |  |
|     | BRCA2:NM_000059:c.1-26G>A                     | rs1799943   | 52,65        | Known      |                                      |  |
|     | BRCA2:NM_000059:c.425+246G>C                  | rs11571613  | 70           |            | Out of pre-NGS method covered region |  |
|     | BRCA2:NM_000059:c.631+183T>A                  | rs3752451   | 53,19        |            | Out of pre-NGS method covered region |  |
|     | BRCA2:NM_000059:c.793+98G>A                   | rs206073    | 100          |            | Out of pre-NGS method covered region |  |
|     | BRCA2:NM_000059:c.1114A>C                     | rs144848    | 47,2         | Known      |                                      |  |
|     | BRCA2:NM_000059:c.3396A>G                     | rs1801406   | 45,99        | Known      |                                      |  |
|     | BRCA2:NM_000059:c.4563A>G                     | rs206075    | 100          | Known      |                                      |  |
|     | BRCA2:NM_000059:c.6513G>C                     | rs206076    | 99,8         | Known      |                                      |  |
|     | BRCA2:NM_000059:c.6841+191C>A                 | rs11571662  | 53,79        |            | Out of pre-NGS method covered region |  |
|     | BRCA2:NM_000059:c.6938-120T>C                 | rs206080    | 99,55        |            | Out of pre-NGS method covered region |  |
|     | BRCA2:NM_000059:c.7242A>G                     | rs1799955   | 46,14        | Known      |                                      |  |
|     | BRCA2:NM_000059:c.7397T>C                     | rs169547    | 100          | Known      |                                      |  |
|     | BRCA2:NM_000059:c.7617+190G>A                 | rs206096    | 100          |            | Out of pre-NGS method covered region |  |
|     | BRCA2:NM_000059:c.7806-14T>C                  | rs9534262   | 51,41        | Known      |                                      |  |
|     | BRCA2:NM_000059:c.8754+183A>C                 | rs3764791   | 44,83        |            | Out of pre-NGS method covered region |  |
|     | BRCA2:NM_000059:c.8754+187C>T                 | rs3764792   | 42,86        |            | Out of pre-NGS method covered region |  |

Supplementary Table S4

|     |                                                 |                    |              |            |                                      |  |  |
|-----|-------------------------------------------------|--------------------|--------------|------------|--------------------------------------|--|--|
|     | BRCA2:NM_000059:c.8755-66T>C                    | rs4942486          | 46,47        |            | Out of pre-NGS method covered region |  |  |
|     | BRCA2:NM_000059:c.9257-219A>G                   | rs7330025          | 60           |            | Out of pre-NGS method covered region |  |  |
|     | BRCA2:NM_000059:c.9648+244T>C                   | rs206344           | 100          |            | Out of pre-NGS method covered region |  |  |
|     | BRCA2:NM_000059:c.6841+78_6841+81delAATT        | rs138193280        | 41,61        |            | Out of pre-NGS method covered region |  |  |
|     | BRCA1:NM_007294:c.5407-193A>G                   | rs8176310          | 48,57        |            | Out of pre-NGS method covered region |  |  |
|     | BRCA1:NM_007294:c.5333-153A>G                   | rs8176305          | 44,14        |            | Out of pre-NGS method covered region |  |  |
|     | BRCA1:NM_007294:c.5278-191A>T                   | rs8176297          | 57,14        |            | Out of pre-NGS method covered region |  |  |
|     | BRCA1:NM_007294:c.5152+66G>A                    | rs3092994          | 57           |            | Out of pre-NGS method covered region |  |  |
|     | BRCA1:NM_007294:c.5075-238A>G                   | rs8176256          | 64,29        |            | Out of pre-NGS method covered region |  |  |
|     | BRCA1:NM_007294:c.4987-68A>G                    | rs8176234          | 60           |            | Out of pre-NGS method covered region |  |  |
|     | BRCA1:NM_007294:c.4987-92A>G                    | rs8176233          | 63,64        |            | Out of pre-NGS method covered region |  |  |
|     | BRCA1:NM_007294:c.4986+222A>G                   | rs3092987          | 66,67        |            | Out of pre-NGS method covered region |  |  |
|     | BRCA1:NM_007294:c.4837A>G                       | rs1799966          | 46,25        | Known      |                                      |  |  |
|     | BRCA1:NM_007294:c.4485-63C>G                    | rs8176212          | 57,06        |            | Out of pre-NGS method covered region |  |  |
|     | BRCA1:NM_007294:c.4485-137T>A                   | rs2236762          | 57,35        |            | Out of pre-NGS method covered region |  |  |
|     | BRCA1:NM_007294:c.4358-2590T>G                  | rs8176194          | 48,96        |            | Out of pre-NGS method covered region |  |  |
|     | BRCA1:NM_007294:c.4358-2885G>A                  | rs8176193          | 46,13        |            | Out of pre-NGS method covered region |  |  |
|     | BRCA1:NM_007294:c.4308T>C                       | rs1060915          | 45,86        | Known      |                                      |  |  |
|     | BRCA1:NM_007294:c.4097-141A>C                   | rs799916           | 44,07        |            | Out of pre-NGS method covered region |  |  |
|     | BRCA1:NM_007294:c.3548A>G                       | rs16942            | 51,05        | Known      |                                      |  |  |
|     | BRCA1:NM_007294:c.3113A>G                       | rs16941            | 46,46        | Known      |                                      |  |  |
|     | BRCA1:NM_007294:c.2612C>T                       | rs799917           | 45,34        | Known      |                                      |  |  |
|     | BRCA1:NM_007294:c.2311T>C                       | rs16940            | 46,85        | Known      |                                      |  |  |
|     | BRCA1:NM_007294:c.2082C>T                       | rs1799949          | 47,46        | Known      |                                      |  |  |
|     | BRCA1:NM_007294:c.2077G>A                       | rs4986850          | 48,35        | Known      |                                      |  |  |
|     | BRCA1:NM_007294:c.671-178G>A                    | rs8176151          | 60,71        |            | Out of pre-NGS method covered region |  |  |
|     | BRCA1:NM_007294:c.593+167T>C                    | rs8176145          | 52,88        |            | Out of pre-NGS method covered region |  |  |
|     | BRCA1:NM_007294:c.547+146A>T                    | rs8176140          | 41,03        |            | Out of pre-NGS method covered region |  |  |
|     | BRCA1:NM_007294:c.213-161A>G                    | rs799912           | 50           |            | Out of pre-NGS method covered region |  |  |
|     | BRCA1:NM_007294:c.1-134T>C                      | rs3765640          | 55,88        | Known      |                                      |  |  |
|     | BRCA1:NM_007294:c.4485-203_4485-199delAACCC     | rs34250703         | 46,34        |            | Out of pre-NGS method covered region |  |  |
|     | BRCA1:NM_007294:c.548-58_548-58delT             | rs8176144          | 41,23        |            | Out of pre-NGS method covered region |  |  |
|     | BRCA1:NM_007294:c.441+52_441+63delCTTTTTTTTTTTT | .                  | 54,23        |            | Out of pre-NGS method covered region |  |  |
|     | BRCA1:NM_007294:c.441+36_441+38delCTT           | rs147856441        | 49,57        | Known      |                                      |  |  |
| V31 |                                                 |                    |              |            |                                      |  |  |
|     | APC:NM_001127510:c.1-176G>A                     | .                  | 65           |            | Out of pre-NGS method covered region |  |  |
|     | APC:NM_001127510:c.136-53T>C                    | rs2304793          | 50,67        | Known      |                                      |  |  |
|     | APC:NM_001127510:c.423-256G>A                   | rs392179           | 100          |            | Out of pre-NGS method covered region |  |  |
|     | APC:NM_001127510:c.645+129A>C                   | rs2289485          | 42,86        | Known      |                                      |  |  |
|     | APC:NM_001127510:c.645+173A>G                   | rs2289484          | 57,14        | Known      |                                      |  |  |
|     | APC:NM_001127510:c.934-132G>T                   | rs12521276         | 100          |            | Out of pre-NGS method covered region |  |  |
|     | APC:NM_001127510:c.934-92G>C                    | rs80307314         | 64,56        | Known      |                                      |  |  |
|     | APC:NM_001127510:c.1458T>C                      | rs2229992          | 47,67        | Known      |                                      |  |  |
|     | APC:NM_001127510:c.1635G>A                      | rs351771           | 50,22        | Known      |                                      |  |  |
|     | <b>APC:NM_001127510:c.1660C&gt;T</b>            | <b>rs137854573</b> | <b>48,4</b>  | <b>PAT</b> |                                      |  |  |
|     | APC:NM_001127510:c.1743+193G>A                  | rs351772           | 47,37        | Known      |                                      |  |  |
|     | <b>APC:NM_001127510:c.3264G&gt;A</b>            | <b>rs114774495</b> | <b>50,59</b> | <b>VUS</b> |                                      |  |  |
|     | APC:NM_001127510:c.4479G>A                      | rs41115            | 47,86        | Known      |                                      |  |  |
|     | APC:NM_001127510:c.5034G>A                      | rs42427            | 49,41        | Known      |                                      |  |  |
|     | APC:NM_001127510:c.5268T>G                      | rs866006           | 50,4         | Known      |                                      |  |  |
|     | APC:NM_001127510:c.5465T>A                      | rs459552           | 100          |            | Could not be detected by CSCE        |  |  |
|     | APC:NM_001127510:c.5880G>A                      | rs465899           | 47,14        | Known      |                                      |  |  |
|     | APC:NM_001127510:c.8532+86C>A                   | rs1804197          | 41,3         | Known      |                                      |  |  |
|     | APC:NM_001127511:c.1-134_1-133insG              | .                  | 46,67        |            | Out of pre-NGS method covered region |  |  |
|     | APC:NM_001127510:c.934-133_934-132delTG         | rs369189394        | 29,17        |            | Out of pre-NGS method covered region |  |  |
|     | APC:NM_001127510:c.934-132_934-132delG          | rs141013063        | 64,71        |            | Out of pre-NGS method covered region |  |  |
|     | APC:NM_001127510:c.934-120_934-119insG          | rs138003874        | 25           |            | Out of pre-NGS method covered region |  |  |
|     | APC:NM_001127510:c.1959-145_1959-144insAGAA     | rs3839284          | 47,73        |            | Out of pre-NGS method covered region |  |  |

Supplementary Table S4

|     |                                                  |            |              |            |                                             |  |
|-----|--------------------------------------------------|------------|--------------|------------|---------------------------------------------|--|
| V32 |                                                  |            |              |            |                                             |  |
|     | MLH1:NM_000249:c.1-93G>A                         | rs1800734  | 60,64        |            | Out of pre-NGS method covered region        |  |
|     | MLH1:NM_000249:c.453+79A>G                       | rs4234259  | 43,08        |            | Out of pre-NGS method covered region        |  |
|     | MLH1:NM_000249:c.655A>G                          | rs1799977  | 66,67        | Known      |                                             |  |
|     | MLH1:NM_000249:c.678-211T>A                      | .          | 75           |            | Out of pre-NGS method covered region        |  |
|     | MLH1:NM_000249:c.1038+86T>C                      | rs2286939  | 50           |            | Out of pre-NGS method covered region        |  |
|     | MLH1:NM_000249:c.1039-78A>G                      | rs11129748 | 47,06        |            | Out of pre-NGS method covered region        |  |
|     | MLH1:NM_000249:c.1039-29A>T                      | rs6771325  | 46,15        |            | Out of pre-NGS method covered region        |  |
|     | MLH1:NM_000249:c.1410-169C>T                     | rs2286940  | 70           |            | Out of pre-NGS method covered region        |  |
|     | MLH1:NM_000249:c.1668-19A>G                      | rs9876116  | 41,51        |            | Out of pre-NGS method covered region        |  |
|     | MLH1:NM_000249:c.1990-121C>T                     | rs2241031  | 53,09        |            | Out of pre-NGS method covered region        |  |
|     | <b>MLH1:NM_000249:c.541_541delG</b>              | .          | <b>46,22</b> | <b>PAT</b> |                                             |  |
|     | MLH1:NM_000249:c.1897-167_1897-167delT           | rs11290150 | 88,24        |            | Out of pre-NGS method covered region        |  |
| V33 |                                                  |            |              |            |                                             |  |
|     | NF1:NM_000267:c.889-192G>T                       | .          | 100          |            | Could not be detected by RNA-based analysis |  |
|     | NF1:NM_000267:c.2034G>A                          | rs2285892  | 100          | Known      |                                             |  |
|     | NF1:NM_000267:c.3197+139T>C                      | rs2071009  | 98,33        |            | Could not be detected by RNA-based analysis |  |
|     | NF1:NM_000267:c.3315-130G>C                      | rs2072131  | 99,45        |            | Could not be detected by RNA-based analysis |  |
|     | NF1:NM_000267:c.3496+33C>A                       | rs2066736  | 100          |            | Could not be detected by RNA-based analysis |  |
|     | NF1:NM_000267:c.3974+46T>G                       | rs72813695 | 83,97        |            | Could not be detected by RNA-based analysis |  |
|     | NF1:NM_000267:c.7126+37C>G                       | rs7405740  | 99,48        |            | Could not be detected by RNA-based analysis |  |
|     | NF1:NM_000267:c.8097+71A>T                       | .          | 23,53        |            | Could not be detected by RNA-based analysis |  |
|     | NF1:NM_000267:c.2002-118_2002-117insACACACACAC   | .          | 28,57        |            | Could not be detected by RNA-based analysis |  |
|     | <b>NF1:NM_000267:c.2956_2957insT</b>             | .          | <b>48,22</b> | <b>PAT</b> |                                             |  |
|     | NF1:NM_000267:c.3974+33_3974+34insTG             | .          | 72,76        |            | Could not be detected by RNA-based analysis |  |
|     | NF1:NM_000267:c.6085-29_6085-28insA              | rs33925668 | 78,53        |            | Could not be detected by RNA-based analysis |  |
| V34 |                                                  |            |              |            |                                             |  |
|     | NF1:NM_000267:c.61-300C>T                        | rs2269856  | 66,67        |            | Could not be detected by RNA-based analysis |  |
|     | NF1:NM_000267:c.61-123G>A                        | rs2269855  | 50,61        |            | Could not be detected by RNA-based analysis |  |
|     | NF1:NM_000267:c.288+41G>A                        | rs2952976  | 47,83        |            | Could not be detected by RNA-based analysis |  |
|     | NF1:NM_000267:c.480-90C>T                        | rs2905807  | 46,91        |            | Could not be detected by RNA-based analysis |  |
|     | NF1:NM_000267:c.702G>A                           | rs1801052  | 49,55        | Known      |                                             |  |
|     | <b>NF1:NM_000267:c.731-1G&gt;C</b>               | .          | <b>52,86</b> | <b>PAT</b> |                                             |  |
|     | NF1:NM_000267:c.888+108C>T                       | rs2953000  | 53,49        |            | Could not be detected by RNA-based analysis |  |
|     | NF1:NM_000267:c.888+118G>T                       | rs2952999  | 54,67        |            | Could not be detected by RNA-based analysis |  |
|     | NF1:NM_000267:c.1393-130A>T                      | rs2905875  | 48,99        |            | Could not be detected by RNA-based analysis |  |
|     | NF1:NM_000267:c.1393-32T>C                       | rs2905876  | 43,77        |            | Could not be detected by RNA-based analysis |  |
|     | NF1:NM_000267:c.1641+39T>C                       | rs2905880  | 54,49        |            | Could not be detected by RNA-based analysis |  |
|     | NF1:NM_000267:c.2034G>A                          | rs2285892  | 46,09        | Known      |                                             |  |
|     | NF1:NM_000267:c.3197+139T>C                      | rs2071009  | 45,65        |            | Could not be detected by RNA-based analysis |  |
|     | NF1:NM_000267:c.3315-130G>C                      | rs2072131  | 44,98        |            | Could not be detected by RNA-based analysis |  |
|     | NF1:NM_000267:c.3496+33C>A                       | rs2066736  | 49,69        |            | Could not be detected by RNA-based analysis |  |
|     | NF1:NM_000267:c.3974+46T>G                       | rs72813695 | 40,44        |            | Could not be detected by RNA-based analysis |  |
|     | NF1:NM_000267:c.5205+23T>C                       | rs9894648  | 47,1         |            | Could not be detected by RNA-based analysis |  |
|     | NF1:NM_000267:c.5546+19T>A                       | rs2285894  | 47,2         |            | Could not be detected by RNA-based analysis |  |
|     | NF1:NM_000267:c.5546+117G>A                      | rs3815154  | 51,36        |            | Could not be detected by RNA-based analysis |  |
|     | NF1:NM_000267:c.6085-29T>A                       | rs7406038  | 49,11        |            | Could not be detected by RNA-based analysis |  |
|     | NF1:NM_000267:c.6085-28T>A                       | rs7406039  | 58,56        |            | Could not be detected by RNA-based analysis |  |
|     | NF1:NM_000267:c.7126+37C>G                       | rs7405740  | 100          |            | Could not be detected by RNA-based analysis |  |
|     | NF1:NM_000267:c.7395-29G>A                       | rs964288   | 44,59        |            | Could not be detected by RNA-based analysis |  |
|     | NF1:NM_000267:c.7907+166C>T                      | rs7350943  | 53,33        |            | Could not be detected by RNA-based analysis |  |
|     | NF1:NM_000267:c.8097+30G>T                       | .          | 20,69        |            | Could not be detected by RNA-based analysis |  |
|     | NF1:NM_000267:c.889-191_889-190insT              | rs35966725 | 35,29        |            | Could not be detected by RNA-based analysis |  |
|     | NF1:NM_000267:c.1528-37_1528-36insT              | rs67472948 | 44,86        |            | Could not be detected by RNA-based analysis |  |
|     | NF1:NM_000267:c.2002-118_2002-117insACACACACACAC | .          | 20,45        |            | Could not be detected by RNA-based analysis |  |
|     | NF1:NM_000267:c.3974+33_3974+34insTG             | .          | 34,7         |            | Could not be detected by RNA-based analysis |  |
| V35 |                                                  |            |              |            |                                             |  |
|     | NF1:NM_000267:c.61-300C>T                        | rs2269856  | 100          |            | Could not be detected by RNA-based analysis |  |



Supplementary Table S4

|     |                                                         |                               |              |            |                                             |  |
|-----|---------------------------------------------------------|-------------------------------|--------------|------------|---------------------------------------------|--|
|     | NF1:NM_000267:c.61-123G>A                               | rs2269855                     | 100          |            | Could not be detected by RNA-based analysis |  |
|     | NF1:NM_000267:c.288+41G>A                               | rs2952976                     | 100          |            | Could not be detected by RNA-based analysis |  |
|     | NF1:NM_000267:c.480-90C>T                               | rs2905807                     | 100          |            | Could not be detected by RNA-based analysis |  |
|     | NF1:NM_000267:c.702G>A                                  | rs1801052                     | 97,9         | Known      |                                             |  |
|     | NF1:NM_000267:c.730+85A>T                               | .                             | 20,48        |            | Could not be detected by RNA-based analysis |  |
|     | NF1:NM_000267:c.888+108C>T                              | rs2953000                     | 100          |            | Could not be detected by RNA-based analysis |  |
|     | NF1:NM_000267:c.888+118G>T                              | rs2952999                     | 100          |            | Could not be detected by RNA-based analysis |  |
|     | NF1:NM_000267:c.1393-130A>T                             | rs2905875                     | 100          |            | Could not be detected by RNA-based analysis |  |
|     | NF1:NM_000267:c.1393-32T>C                              | rs2905876                     | 100          |            | Could not be detected by RNA-based analysis |  |
|     | NF1:NM_000267:c.1641+39T>C                              | rs2905880                     | 100          |            | Could not be detected by RNA-based analysis |  |
|     | NF1:NM_000267:c.1642-158A>G                             | rs17883230                    | 81,03        |            | Could not be detected by RNA-based analysis |  |
|     | NF1:NM_000267:c.5205+23T>C                              | rs9894648                     | 100          |            | Could not be detected by RNA-based analysis |  |
|     | NF1:NM_000267:c.5546+19T>A                              | rs2285894                     | 99,25        |            | Could not be detected by RNA-based analysis |  |
|     | NF1:NM_000267:c.5546+117G>A                             | rs3815154                     | 100          |            | Could not be detected by RNA-based analysis |  |
|     | NF1:NM_000267:c.6085-29T>A                              | rs7406038                     | 94,88        |            | Could not be detected by RNA-based analysis |  |
|     | NF1:NM_000267:c.6085-28T>A                              | rs7406039                     | 100          |            | Could not be detected by RNA-based analysis |  |
|     | NF1:NM_000267:c.7126+37C>G                              | rs7405740                     | 100          |            | Could not be detected by RNA-based analysis |  |
|     | NF1:NM_000267:c.7395-29G>A                              | rs964288                      | 100          |            | Could not be detected by RNA-based analysis |  |
|     | NF1:NM_000267:c.7907+166C>T                             | rs7350943                     | 100          |            | Could not be detected by RNA-based analysis |  |
|     | NF1:NM_000267:c.8050+20G>A                              | rs55747230                    | 22,4         |            | Could not be detected by RNA-based analysis |  |
|     | NF1:NM_000267:c.730+15_730+16insT                       | .                             | 33,89        |            | Could not be detected by RNA-based analysis |  |
|     | NF1:NM_000267:c.889-191_889-190insT                     | rs35966725                    | 87,5         |            | Could not be detected by RNA-based analysis |  |
|     | NF1:NM_000267:c.1528-37_1528-36insT                     | rs67472948                    | 92,45        |            | Could not be detected by RNA-based analysis |  |
|     | NF1:NM_000267:c.2002-118_2002-117insAC                  | rs141114572                   | 43,4         |            | Could not be detected by RNA-based analysis |  |
|     | NF1:NM_000267:c.3314+154_3314+154delT                   | rs17881842                    | 84,21        |            | Could not be detected by RNA-based analysis |  |
|     | <b>NF1:NM_000267: whole gene deletion</b>               | Detected by I2HCP copy number |              | <b>PAT</b> |                                             |  |
| V36 |                                                         |                               |              |            |                                             |  |
|     | NF1:NM_000267:c.61-300C>T                               | rs2269856                     | 100          |            | Could not be detected by RNA-based analysis |  |
|     | NF1:NM_000267:c.61-123G>A                               | rs2269855                     | 99,38        |            | Could not be detected by RNA-based analysis |  |
|     | NF1:NM_000267:c.288+41G>A                               | rs2952976                     | 100          |            | Could not be detected by RNA-based analysis |  |
|     | NF1:NM_000267:c.480-90C>T                               | rs2905807                     | 98,53        |            | Could not be detected by RNA-based analysis |  |
|     | NF1:NM_000267:c.655-37A>C                               | rs375655707                   | 46,49        |            | Could not be detected by RNA-based analysis |  |
|     | NF1:NM_000267:c.702G>A                                  | rs1801052                     | 97,55        | Known      |                                             |  |
|     | NF1:NM_000267:c.888+108C>T                              | rs2953000                     | 100          |            | Could not be detected by RNA-based analysis |  |
|     | NF1:NM_000267:c.888+118G>T                              | rs2952999                     | 100          |            | Could not be detected by RNA-based analysis |  |
|     | <b>NF1:NM_000267:c.1381C&gt;T</b>                       | .                             | <b>49,23</b> | <b>PAT</b> |                                             |  |
|     | NF1:NM_000267:c.1393-130A>T                             | rs2905875                     | 100          |            | Could not be detected by RNA-based analysis |  |
|     | NF1:NM_000267:c.1393-32T>C                              | rs2905876                     | 99,6         |            | Could not be detected by RNA-based analysis |  |
|     | NF1:NM_000267:c.1641+39T>C                              | rs2905880                     | 99,55        |            | Could not be detected by RNA-based analysis |  |
|     | NF1:NM_000267:c.5205+23T>C                              | rs9894648                     | 49,25        |            | Could not be detected by RNA-based analysis |  |
|     | NF1:NM_000267:c.5546+19T>A                              | rs2285894                     | 46,97        |            | Could not be detected by RNA-based analysis |  |
|     | NF1:NM_000267:c.5546+117G>A                             | rs3815154                     | 52,46        |            | Could not be detected by RNA-based analysis |  |
|     | NF1:NM_000267:c.6085-29T>A                              | rs7406038                     | 46,63        |            | Could not be detected by RNA-based analysis |  |
|     | NF1:NM_000267:c.6085-28T>A                              | rs7406039                     | 54,27        |            | Could not be detected by RNA-based analysis |  |
|     | NF1:NM_000267:c.7126+37C>G                              | rs7405740                     | 54,17        |            | Could not be detected by RNA-based analysis |  |
|     | NF1:NM_000267:c.7395-29G>A                              | rs964288                      | 37,62        |            | Could not be detected by RNA-based analysis |  |
|     | NF1:NM_000267:c.7970+166C>T;NF1:NM_000267:c.7907+166C>T | rs7350943                     | 59,09        |            | Could not be detected by RNA-based analysis |  |
|     | NF1:NM_000267:c.730+15_730+16insT                       | .                             | 33,75        |            | Could not be detected by RNA-based analysis |  |
|     | NF1:NM_000267:c.889-191_889-190insT                     | rs35966725                    | 100          |            | Could not be detected by RNA-based analysis |  |
|     | NF1:NM_000267:c.1528-37_1528-36insT                     | rs67472948                    | 93,47        |            | Could not be detected by RNA-based analysis |  |
|     | NF1:NM_000267:c.2002-118_2002-117insAC                  | rs141114572                   | 46,94        |            | Could not be detected by RNA-based analysis |  |
|     | NF1:NM_000267:c.3198-29_3198-29delT                     | .                             | 20,49        |            | Could not be detected by RNA-based analysis |  |
| V37 |                                                         |                               |              |            |                                             |  |
|     | NF1:NM_00267:c.61-123G>A                                | rs2269855                     | 52,49        |            | Could not be detected by RNA-based analysis |  |
|     | <b>NF1:NM_00267:c.278G&gt;A</b>                         | <b>rs199474728</b>            | <b>59,06</b> | <b>PAT</b> |                                             |  |
|     | NF1:NM_00267:c.288+41G>A                                | rs2952976                     | 63,44        |            | Could not be detected by RNA-based analysis |  |
|     | NF1:NM_00267:c.480-90C>T                                | rs2905807                     | 45,05        |            | Could not be detected by RNA-based analysis |  |
|     | NF1:NM_00267:c.587-140A>G                               | .                             | 55,17        |            | Could not be detected by RNA-based analysis |  |

Supplementary Table S4

|     |                                                        |                               |       |            |                                             |  |
|-----|--------------------------------------------------------|-------------------------------|-------|------------|---------------------------------------------|--|
|     | NF1:NM_00267:c.702G>A                                  | rs1801052                     | 58,9  | Known      |                                             |  |
|     | NF1:NM_00267:c.1393-130A>T                             | rs2905875                     | 47,92 |            | Could not be detected by RNA-based analysis |  |
|     | NF1:NM_00267:c.1393-32T>C                              | rs2905876                     | 50,36 |            | Could not be detected by RNA-based analysis |  |
|     | NF1:NM_00267:c.1641+39T>C                              | rs2905880                     | 34,88 |            | Could not be detected by RNA-based analysis |  |
|     | NF1:NM_00267:c.2034G>A                                 | rs2285892                     | 41,1  | Known      |                                             |  |
|     | NF1:NM_00267:c.3315-130G>C                             | rs2072131                     | 48,21 |            | Could not be detected by RNA-based analysis |  |
|     | NF1:NM_00267:c.3496+33C>A                              | rs2066736                     | 53,33 |            | Could not be detected by RNA-based analysis |  |
|     | NF1:NM_00267:c.3974+46T>G                              | rs72813695                    | 38,46 |            | Could not be detected by RNA-based analysis |  |
|     | NF1:NM_00267:c.5268+23T>C;NF1:NM_000267:c.5205+23T>C   | rs9894648                     | 36,73 |            | Could not be detected by RNA-based analysis |  |
|     | NF1:NM_00267:c.5609+19T>A;NF1:NM_000267:c.5546+19T>A   | rs2285894                     | 44,9  |            | Could not be detected by RNA-based analysis |  |
|     | NF1:NM_00267:c.5609+117G>A;NF1:NM_000267:c.5546+117G>A | rs3815154                     | 43,22 |            | Could not be detected by RNA-based analysis |  |
|     | NF1:NM_00267:c.6148-29T>A;NF1:NM_000267:c.6085-29T>A   | rs7406038                     | 35,86 |            | Could not be detected by RNA-based analysis |  |
|     | NF1:NM_00267:c.7189+37C>G;NF1:NM_000267:c.7126+37C>G   | rs7405740                     | 100   |            | Could not be detected by RNA-based analysis |  |
|     | NF1:NM_00267:c.7458-29G>A;NF1:NM_000267:c.7395-29G>A   | rs964288                      | 54,29 |            | Could not be detected by RNA-based analysis |  |
|     | NF1:NM_00267:c.8160+30G>T;NF1:NM_000267:c.8097+30G>T   | .                             | 33,33 |            | Could not be detected by RNA-based analysis |  |
|     | NF1:NM_00267:c.730+15_730+16insT                       | .                             | 25,41 |            | Could not be detected by RNA-based analysis |  |
|     | NF1:NM_00267:c.1528-37_1528-36insT                     | rs67472948                    | 47,26 |            | Could not be detected by RNA-based analysis |  |
|     | NF1:NM_000267:c.2002-118_2002-117insACACACACACAC       | .                             | 35    |            | Could not be detected by RNA-based analysis |  |
|     | NF1:NM_000267:c.3974+33_3974+34insTG                   | .                             | 32,61 |            | Could not be detected by RNA-based analysis |  |
|     | NF1:NM_000267:c.6085-29_6085-28insA                    | rs33925668                    | 54,05 |            | Could not be detected by RNA-based analysis |  |
| V38 |                                                        |                               |       |            |                                             |  |
|     | NF2:NM_000268:c.241-85G>T                              | rs5763378                     | 51,43 |            | Could not be detected by RNA-based analysis |  |
|     | NF2:NM_000268:c.364-39A>C                              | rs2530664                     | 46,58 |            | Could not be detected by RNA-based analysis |  |
|     | NF2:NM_000268:c.600-154G>A                             | rs2071622                     | 59,04 |            | Could not be detected by RNA-based analysis |  |
|     | NF2:NM_000268:c.886-205C>T                             | rs2252472                     | 72,73 |            | Could not be detected by RNA-based analysis |  |
|     | NF2:NM_000268:c.1122+129A>T                            | rs2527336                     | 52,73 |            | Could not be detected by RNA-based analysis |  |
|     | NF2:NM_000268:c.1123-51C>T                             | rs13055076                    | 43,08 |            | Could not be detected by RNA-based analysis |  |
|     | NF2:NM_000268:c.1575-67G>A                             | rs140086                      | 99,18 |            | Could not be detected by RNA-based analysis |  |
|     | NF2:NM_000268:c.1737+1623T>C                           | rs7291645                     | 100   |            | Could not be detected by RNA-based analysis |  |
|     | <b>NF2:NM_000268: exon 15 deletion</b>                 | Detected by I2HCP copy number |       | <b>PAT</b> |                                             |  |
| V39 |                                                        |                               |       |            |                                             |  |
|     | SMARCB1:NM_003073:c.1-117C>T                           | rs11090285                    | 69,23 |            | Could not be detected by RNA-based analysis |  |
|     | SMARCB1:NM_003073:c.363-154G>C                         | rs9608185                     | 100   |            | Could not be detected by RNA-based analysis |  |
|     | SMARCB1:NM_003073:c.363-153C>T                         | rs9608186                     | 98,33 |            | Could not be detected by RNA-based analysis |  |
|     | SMARCB1:NM_003073:c.500+234C>G                         | rs738797                      | 100   |            | Could not be detected by RNA-based analysis |  |
|     | SMARCB1:NM_003073:c.501-164C>T                         | rs11090286                    | 62,96 |            | Could not be detected by RNA-based analysis |  |
|     | SMARCB1:NM_003073:c.501-87A>G                          | rs5760030                     | 100   |            | Could not be detected by RNA-based analysis |  |
|     | SMARCB1:NM_003073:c.628+66G>C                          | rs5751738                     | 99,45 |            | Could not be detected by RNA-based analysis |  |
|     | SMARCB1:NM_003073:c.628+118C>T                         | rs5760032                     | 50,79 |            | Could not be detected by RNA-based analysis |  |
|     | SMARCB1:NM_003073:c.628+200T>C                         | rs17003912                    | 54,55 |            | Could not be detected by RNA-based analysis |  |
|     | SMARCB1:NM_003073:c.629-248A>G                         | rs2073392                     | 100   |            | Could not be detected by RNA-based analysis |  |
|     | SMARCB1:NM_003073:c.629-62A>G                          | rs9608192                     | 48,29 |            | Could not be detected by RNA-based analysis |  |
|     | SMARCB1:NM_003073:c.795+121G>A                         | rs9612452                     | 44,14 |            | Could not be detected by RNA-based analysis |  |
|     | SMARCB1:NM_003073:c.795+153A>G                         | rs2073393                     | 43,4  |            | Could not be detected by RNA-based analysis |  |
|     | SMARCB1:NM_003073:c.795+184A>T                         | rs2070458                     | 65    |            | Could not be detected by RNA-based analysis |  |
|     | SMARCB1:NM_003073:c.795+198T>C                         | rs2070459                     | 38,89 |            | Could not be detected by RNA-based analysis |  |
|     | SMARCB1:NM_003073:c.897G>A                             | rs2229354                     | 49,89 | Known      |                                             |  |
|     | SMARCB1:NM_003073:c.987-176A>C                         | rs2267045                     | 62,16 |            | Could not be detected by RNA-based analysis |  |
|     | SMARCB1:NM_003073:c.987-139G>A                         | rs2267046                     | 53,57 |            | Could not be detected by RNA-based analysis |  |
|     | SMARCB1:NM_003073:c.1118+163G>T                        | rs17003998                    | 53,06 |            | Could not be detected by RNA-based analysis |  |
|     | SMARCB1:NM_003073:c.1119-164G>A                        | rs9612483                     | 60    |            | Could not be detected by RNA-based analysis |  |
|     | SMARCB1:NM_003073:c.1119-41G>A                         | rs5030613                     | 55    |            | Could not be detected by RNA-based analysis |  |
|     | SMARCB1:NM_003073:c.629-130_629-130delC                | rs34737764                    | 51,32 |            | Could not be detected by RNA-based analysis |  |
|     | SMARCB1:NM_003073:c.986+54_986+55insAA                 | rs5844569                     | 44,27 |            | Could not be detected by RNA-based analysis |  |
|     | SMARCB1:NM_003073:c.986+143_986+145delTCC              | rs34624937                    | 75    |            | Could not be detected by RNA-based analysis |  |
|     | SMARCB1:NM_003073:c.1158+112_1158+113insG              | rs34399789                    | 41,67 |            | Could not be detected by RNA-based analysis |  |
| V40 |                                                        |                               |       |            |                                             |  |
|     | NF2:NM_000268:c.1-110G>C                               | rs1800540                     | 100   |            | Could not be detected by RNA-based analysis |  |

Supplementary Table S4

|                                             |            |           |            |                                             |  |  |
|---------------------------------------------|------------|-----------|------------|---------------------------------------------|--|--|
| NF2:NM_000268:c.240+171T>A                  | rs2530662  | 42,11     |            | Could not be detected by RNA-based analysis |  |  |
| NF2:NM_000268:c.241-85G>T                   | rs5763378  | 50,28     |            | Could not be detected by RNA-based analysis |  |  |
| <b>NF2:NM_000268:c.241-13T&gt;A</b>         | .          | <b>50</b> | <b>PAT</b> |                                             |  |  |
| NF2:NM_000268:c.600-154G>A                  | rs2071622  | 49,44     |            | Could not be detected by RNA-based analysis |  |  |
| NF2:NM_000268:c.886-205C>T                  | rs2252472  | 62,5      |            | Could not be detected by RNA-based analysis |  |  |
| NF2:NM_000268:c.1123-51C>T                  | rs13055076 | 50,76     |            | Could not be detected by RNA-based analysis |  |  |
| NF2:NM_000268:c.1575-67G>A                  | rs140086   | 99,6      |            | Could not be detected by RNA-based analysis |  |  |
| NF2:NM_000268:c.1737+1623T>C                | rs7291645  | 29,27     |            | Could not be detected by RNA-based analysis |  |  |
| NF2:NM_000268:c.599+41_599+41delT           | .          | 21,8      |            | Could not be detected by RNA-based analysis |  |  |
| NF2:NM_000268:c.1447-227_1447-226insTGAGGGA | rs3842713  | 27,03     |            | Could not be detected by RNA-based analysis |  |  |

Table S5: Results from Validation set (n=40)

| Sample | HC syndrome | Genes        | Pathogenic Variant                        | Detected |
|--------|-------------|--------------|-------------------------------------------|----------|
| V1     | FAP         | <i>MUTYH</i> | NM_012222.2:c.1187G>A; <u>c.481G&gt;C</u> | YES      |
| V2     | FAP         | <i>APC</i>   | NM_001127510.2:c.1548+1G>C                | YES      |
| V3     | HNPPC       | <i>MSH2</i>  | NM_000251.2:c.518T>G                      | YES      |
| V4     | HBOC        | <i>BRCA2</i> | NM_000059.3:c.5350_5351delAAinsT          | YES      |
| V5     | HNPPC       | <i>MLH1</i>  | NM_000249.3:c.2150_2153dup                | YES      |
| V6     | HNPPC       | <i>PMS2</i>  | NM_000535.5:c.943C>T                      | YES      |
| V7     | FAP         | <i>APC</i>   | NM_001127510.2:c.1312+3A>G                | YES      |
| V8     | LI-FRAUMENI | <i>TP53</i>  | NM_001126112.2:c.743G>A                   | YES      |
| V9     | HNPPC       | <i>MSH6</i>  | NM_000179.2:c.1618_1620delCTT             | YES      |
| V10    | HBOC        | <i>BRCA1</i> | NM_007294.2:c.3770_3771delAG              | YES      |
| V11    | HBOC        | <i>BRCA1</i> | Unknown disease-causing mutation          | ---      |
| V12    | HBOC        | <i>BRCA2</i> | NM_000059.3:c.1308_1309delGA              | YES      |
| V13    | HNPPC       | <i>PMS2</i>  | NM_000535.5:c.59G>A                       | YES      |
| V14    | HBOC        | <i>BRCA2</i> | NM_000059.3:c.3936_3954del(19bp)          | YES      |
| V15    | FAP         | <i>APC</i>   | NM_001127510.2:c.2344A>T                  | YES      |
| V16    | FAP         | <i>MUTYH</i> | NM_012222.2:c.1187G>A                     | YES      |
| V17    | HBOC        | <i>BRCA2</i> | NM_000059.3:c.262_263delCT                | YES      |
| V18    | HBOC        | <i>BRCA1</i> | NM_007294.2:c.3869_3870delAA              | YES      |
| V19    | HNPPC       | <i>MSH2</i>  | NM_000251.2:c.689_691delCTGinsTT          | YES      |
| V20    | HNPPC       | <i>PMS2</i>  | NM_000535.5:c.780delC                     | YES      |
| V21    | HNPPC       | <i>MLH1</i>  | Unknown disease-causing mutation          | ---      |
| V22    | HBOC        | <i>BRCA1</i> | NM_007294.2:c.68_69delAG                  | YES      |
| V23    | HBOC        | <i>BRCA2</i> | NM_000059.3:c.1128delT                    | YES      |
| V24    | FAP         | <i>APC</i>   | NM_001127510.2:c.3183_3187delACAAA        | YES      |
| V25    | HNPPC       | <i>MSH2</i>  | NM_000251.2:c.388_389delCA                | YES      |
| V26    | HBOC        | <i>BRCA2</i> | NM_000059.3:c.7230delT                    | YES      |

|     |                 |                |                                     |     |
|-----|-----------------|----------------|-------------------------------------|-----|
| V27 | HNPPC           | <i>MSH6</i>    | NM_000179.2:c.2906_2907del          | YES |
| V28 | HBOC            | <i>BRCA2</i>   | NM_000059.3:c.5722_5723delCT        | YES |
| V29 | HBOC            | <i>BRCA1</i>   | NM_007294.2:c.4107_4110dupATCT      | YES |
| V30 | HBOC            | <i>BRCA1</i>   | Unknown disease-causing mutation    | --- |
| V31 | FAP             | <i>APC</i>     | NM_001127510.2:c.1660C>T; c.3264C>A | YES |
| V32 | HNPPC           | <i>MLH1</i>    | NM_000249.3:c.542delG               | YES |
| V33 | NF1             | <i>NF1</i>     | NM_000267.3: c.2957_2958insT        | YES |
| V34 | NF1             | <i>NF1</i>     | NM_000267.3:c.731-1G>C              | YES |
| V35 | NF1             | <i>NF1</i>     | NM_000267.3: whole gene deletion    | YES |
| V36 | NF1             | <i>NF1</i>     | NM_000267.3: c.1381C>T              | YES |
| V37 | NF1             | <i>NF1</i>     | NM_000267.3: c.278G>A               | YES |
| V38 | NF2             | <i>NF2</i>     | NM_000268.3: exon 15 deletion       | YES |
| V39 | SCHWANNOMATOSIS | <i>SMARCB1</i> | Unknown disease-causing mutation    | --- |
| V40 | NF2             | <i>NF2</i>     | NM_000268.3: c.241-13T>A            | YES |

| Sample | HBOC | FAP | HNPCC | NF1 | NF2 |   |
|--------|------|-----|-------|-----|-----|---|
| T1     |      | 3   | 0     | 2   | 2   | 2 |
| T2     |      | 2   | 0     | 1   | 1   | 3 |
| T3     |      | 2   | 0     | 1   | 1   | 3 |
| T4     |      | 2   | 0     | 1   | 1   | 2 |
| T5     |      | 2   | 0     | 1   | 1   | 2 |
| T6     |      | 7   | 0     | 4   | 2   | 4 |
| T7     |      | 2   | 0     | 1   | 1   | 1 |
| T8     |      | 7   | 0     | 4   | 2   | 4 |
| T9     |      | 1   | 0     | 0   | 1   | 1 |
| T10    |      | 4   | 0     | 2   | 1   | 3 |
| T11    |      | 10  | 1     | 6   | 4   | 4 |
| T12    |      | 5   | 0     | 3   | 2   | 4 |
| T13    |      | 1   | 0     | 0   | 1   | 1 |
| T14    |      | 6   | 0     | 3   | 1   | 4 |
| T15    |      | 3   | 0     | 2   | 1   | 2 |
| T16    |      | 3   | 0     | 2   | 1   | 3 |
| T17    |      | 18  | 5     | 8   | 6   | 9 |
| T18    |      | 7   | 0     | 3   | 1   | 3 |
| T19    |      | 3   | 0     | 2   | 1   | 3 |
| T20    |      | 2   | 0     | 1   | 1   | 2 |
| T21    |      | 10  | 0     | 4   | 2   | 4 |
| T22    |      | 9   | 0     | 4   | 3   | 4 |
| T23    |      | 5   | 0     | 3   | 1   | 3 |
| V1     |      | 4   | 0     | 3   | 1   | 3 |
| V2     |      | 8   | 1     | 5   | 3   | 4 |
| V3     |      | 1   | 0     | 0   | 1   | 1 |
| V4     |      | 4   | 0     | 2   | 1   | 3 |
| V5     |      | 47  | 7     | 27  | 10  | 4 |
| V6     |      | 2   | 0     | 1   | 1   | 2 |
| V7     |      | 7   | 1     | 4   | 2   | 4 |
| V8     |      | 17  | 5     | 11  | 2   | 5 |
| V9     |      | 1   | 0     | 0   | 1   | 1 |
| V10    |      | 2   | 0     | 1   | 1   | 1 |
| V11    |      | 2   | 0     | 1   | 1   | 3 |
| V12    |      | 2   | 0     | 1   | 1   | 3 |
| V13    |      | 3   | 0     | 2   | 1   | 3 |
| V14    |      | 2   | 0     | 1   | 1   | 2 |
| V15    |      | 7   | 2     | 5   | 1   | 4 |
| V16    |      | 7   | 1     | 4   | 1   | 4 |
| V17    |      | 3   | 0     | 2   | 1   | 2 |
| V18    |      | 3   | 0     | 2   | 1   | 2 |
| V19    |      | 2   | 0     | 1   | 1   | 2 |

Sheet1

|            |    |   |    |   |    |
|------------|----|---|----|---|----|
| <b>V20</b> | 3  | 0 | 2  | 1 | 3  |
| <b>V21</b> | 2  | 0 | 1  | 1 | 3  |
| <b>V22</b> | 2  | 0 | 1  | 2 | 3  |
| <b>V23</b> | 3  | 0 | 2  | 1 | 2  |
| <b>V24</b> | 3  | 0 | 2  | 1 | 2  |
| <b>V25</b> | 11 | 1 | 5  | 3 | 4  |
| <b>V26</b> | 6  | 1 | 4  | 1 | 4  |
| <b>V27</b> | 5  | 0 | 3  | 1 | 3  |
| <b>V28</b> | 2  | 0 | 1  | 1 | 3  |
| <b>V29</b> | 5  | 0 | 3  | 1 | 2  |
| <b>V30</b> | 4  | 0 | 3  | 2 | 3  |
| <b>V31</b> | 5  | 0 | 2  | 2 | 3  |
| <b>V32</b> | 15 | 1 | 7  | 5 | 7  |
| <b>V33</b> | 31 | 7 | 17 | 6 | 10 |
| <b>V34</b> | 2  | 0 | 1  | 1 | 2  |
| <b>V35</b> | 2  | 0 | 1  | 1 | 3  |
| <b>V36</b> | 2  | 0 | 1  | 1 | 2  |
| <b>V37</b> | 2  | 0 | 1  | 1 | 2  |
| <b>V38</b> | 1  | 0 | 0  | 1 | 2  |
| <b>V39</b> | 8  | 1 | 4  | 1 | 3  |
| <b>V40</b> | 14 | 2 | 8  | 5 | 5  |

Resum\_CNA\_Panell\_Abril2016

| Gene         | Samples    | MLPA analysis (-) | I2HCP CNA analysis (-) | MLPA analysis (+)     | I2HCP CNA analysis (+) |                    |
|--------------|------------|-------------------|------------------------|-----------------------|------------------------|--------------------|
| NF1          | 46         | 43                | 43                     | 3                     | 3                      | (whole gene dele   |
| CDKN2A       | 6          | 1                 | 1                      | 5                     | 5                      |                    |
| BRCA1        | 16         | 16                | 15 (1 undetermined)    | 0                     | 0                      |                    |
| BRCA2        | 16         | 16                | 15 (1 undetermined)    | 0                     | 0                      |                    |
| TP53         | 16         | 16                | 15 (1 undetermined)    | 0                     | 0                      |                    |
| MUTYH        | 1          | 1                 | 1                      | 0                     | 0                      |                    |
| MSH2         | 25         | 25                | 25                     | 0                     | 0                      |                    |
| MSH6         | 12         | 12                | 12                     | 0                     | 0                      |                    |
| MLH1         | 25         | 25                | 25                     | 0                     | 0                      |                    |
| PMS2         | 1          | 1                 | 1                      | 0                     | 0                      |                    |
| CDH1         | 4          | 3                 | 3                      | 1 (exons 1-2 deleted) | 1                      | (exon 2 deleted, € |
| TSC1         | 1          | 1                 | 1                      | 0                     | 0                      |                    |
| TSC2         | 1          | 1                 | 1                      | 0                     | 0                      |                    |
| APC          | 1          | 1                 | 1                      | 0                     | 0                      |                    |
| <b>TOTAL</b> | <b>171</b> | <b>162</b>        | <b>159</b>             | <b>9</b>              | <b>9</b>               |                    |



## SUPPLEMENTARY TABLES AND FIGURES

**Table S1: List of tested genes.** The table includes the genes tested for the five conditions with pre-defined groups. Red dots indicate genes tested in the pre-NGS workflows and black dots indicate genes included in the new gene sets. The list below the table includes the remaining genes present in the I2HCP panel.

**Table S2: Training set results.** Training set contains 23 samples previously genetically characterized. For each sample, gene analyzed and pathogenic mutation detected in each approach is indicated. In addition, for non-identified information on variant context is provided. Pathogenic mutations are colored depending on mutation type: blue: substitution, light green: small deletion or insertion; dark green: medium-sized deletion or insertion; red: big deletions. HomoP indicates variants are within a homopolymer region. Low coverage indicates coverage <30x.

**Table S3: Sequencing and coverage statistics.** Sequencing and coverage statistics of samples in the training (T) and validation (V) sets. Coverage statistics were calculated over the ROIs. Cx indicates the percentage of ROI covered by more than x reads. Ux indicates the uniformity, that is, the percentage of reads within +/- x% of the mean coverage.

**Table S4: Concordance with previously detected variants.** Variants detected in the training (T) and validation (V) sets by I2HCP second approach (V2) in genes previously analyzed by pre-NGS tests. For each variant, dbSNP identifier (rs), frequency, classification (previously known (Known), pathogenic (PAT) or variant of unknown significance (VUS)) are indicated. A short explanation for variants detected by only one method (pre-NGS analysis or I2HCP) is included. In addition, variants also detected by I2HCP first approach (V1) are indicated.

**Table S5: Validation set results.** Validation set contains 40 samples previously genetically characterized. For each sample, gene analyzed and pathogenic mutation detected are indicated. Variants are colored depending on mutation type: blue: substitution, light green: small deletion or insertion; dark green: medium-sized deletion or insertion; red: big deletions. VUS are underlined.

**Table S6: Complementary Sanger sequencing tests required.** The table shows the number of ROIs to be Sanger sequenced due to low coverage for each sample of the training (T) and validation (V) sets if tested for one of the five pre-defined groups of genes.

**Table S7: Comparison of CNA analyses.** One hundred seventy-one copy number alteration (CNA) analyses in 100 patients comprising 14 different genes were performed by MLPA and I2HCP exon-level copy-number calling algorithm. One sample, comprising 3 MLPAs, was non-assessable by I2HCP due to quality criteria.

**Figure S1: Bait redesign.** Example of one exon of *TP53* where bait redesign and rebalancing were applied. Y-axis indicates the depth of coverage of a region of the *TP53* gene (X-axis, reference genome) for different samples. Grey lines: samples using the first approach with V1 baits. Colored lines: samples from the second approach after bait redesign (V2 baits). Yellow and blue lines represent bait density in V1 and V2 (respectively) over the X-axis. A green dotted line denotes the recurrent low coverage region of the *TP53* (grey lines going under the 30x depth coverage, denoted by a pale yellow line) that was clearly improved after bait redesign.

**Figure S2: Examples of coverage per sample.** Global coverage as in Figure 3c for 12 representative samples of the

validation set.

**Figure S3: Regions with recurrent low coverage.** A) Plot showing coverage and %GC content as in Figure 3b. Exons with coverage below 30x in at least 1bp in  $\geq 75\%$  of samples are highlighted in red. Detailed coverage of the two highlighted exons with highest mean coverage are shown. B) List of all highlighted exons in A.

**Figure S4: Analysis pipeline.** Diagram of the I2HCP data analysis pipeline.

**Figure S5: New genetic testing workflow solved uncertain clinical diagnosis.** A patient with clinical suspicion of Neurofibromatosis Type 1 (3 neurofibromas, 1 glioblastoma multiforme, 1 malignant fibrous histiocytoma) (a) was analyzed with the I2HCP. A deletion in *CDKN2A* gene was detected by the exon-level copy-number calling algorithm. (b). Grey dots represent the normalized mean depth of coverage of 27 ROIs close to *CDKN2A* in chromosome 9; black dots represent normalized patient's sample coverage of the same ROIs and red dots indicate *CDKN2A* deleted exons. (c). MLPA analysis validated the loss of *CDKN2A*. Deletion of the whole *CDKN2B* gene was also detected, a locus that was not included in I2HCP. Red dots indicate the deleted region evidenced by MLPA analysis).

**Figure S6: Frequency of pathogenic variants.** The graph depicts the frequency of all pathogenic variants present in the training and validation sets. SNV: single nucleotide variant.
